# Supplementary material
Source: PubMed Central journal article supplement (PMC3276691)

# Supporting Information

## **TLR7- and TLR8-Modulatory Activities of Dimeric Imidazoquinolines**

Nikunj M. Shukla, Cole A. Mutz, Subbalakshmi S. Malladi,  
Hemamali Warshakoon, Rajalakshmi Balakrishna, and  
Sunil A. David\*

Department of Medicinal Chemistry,  
University of Kansas.

# <sup>1</sup>H Spectrum

S2

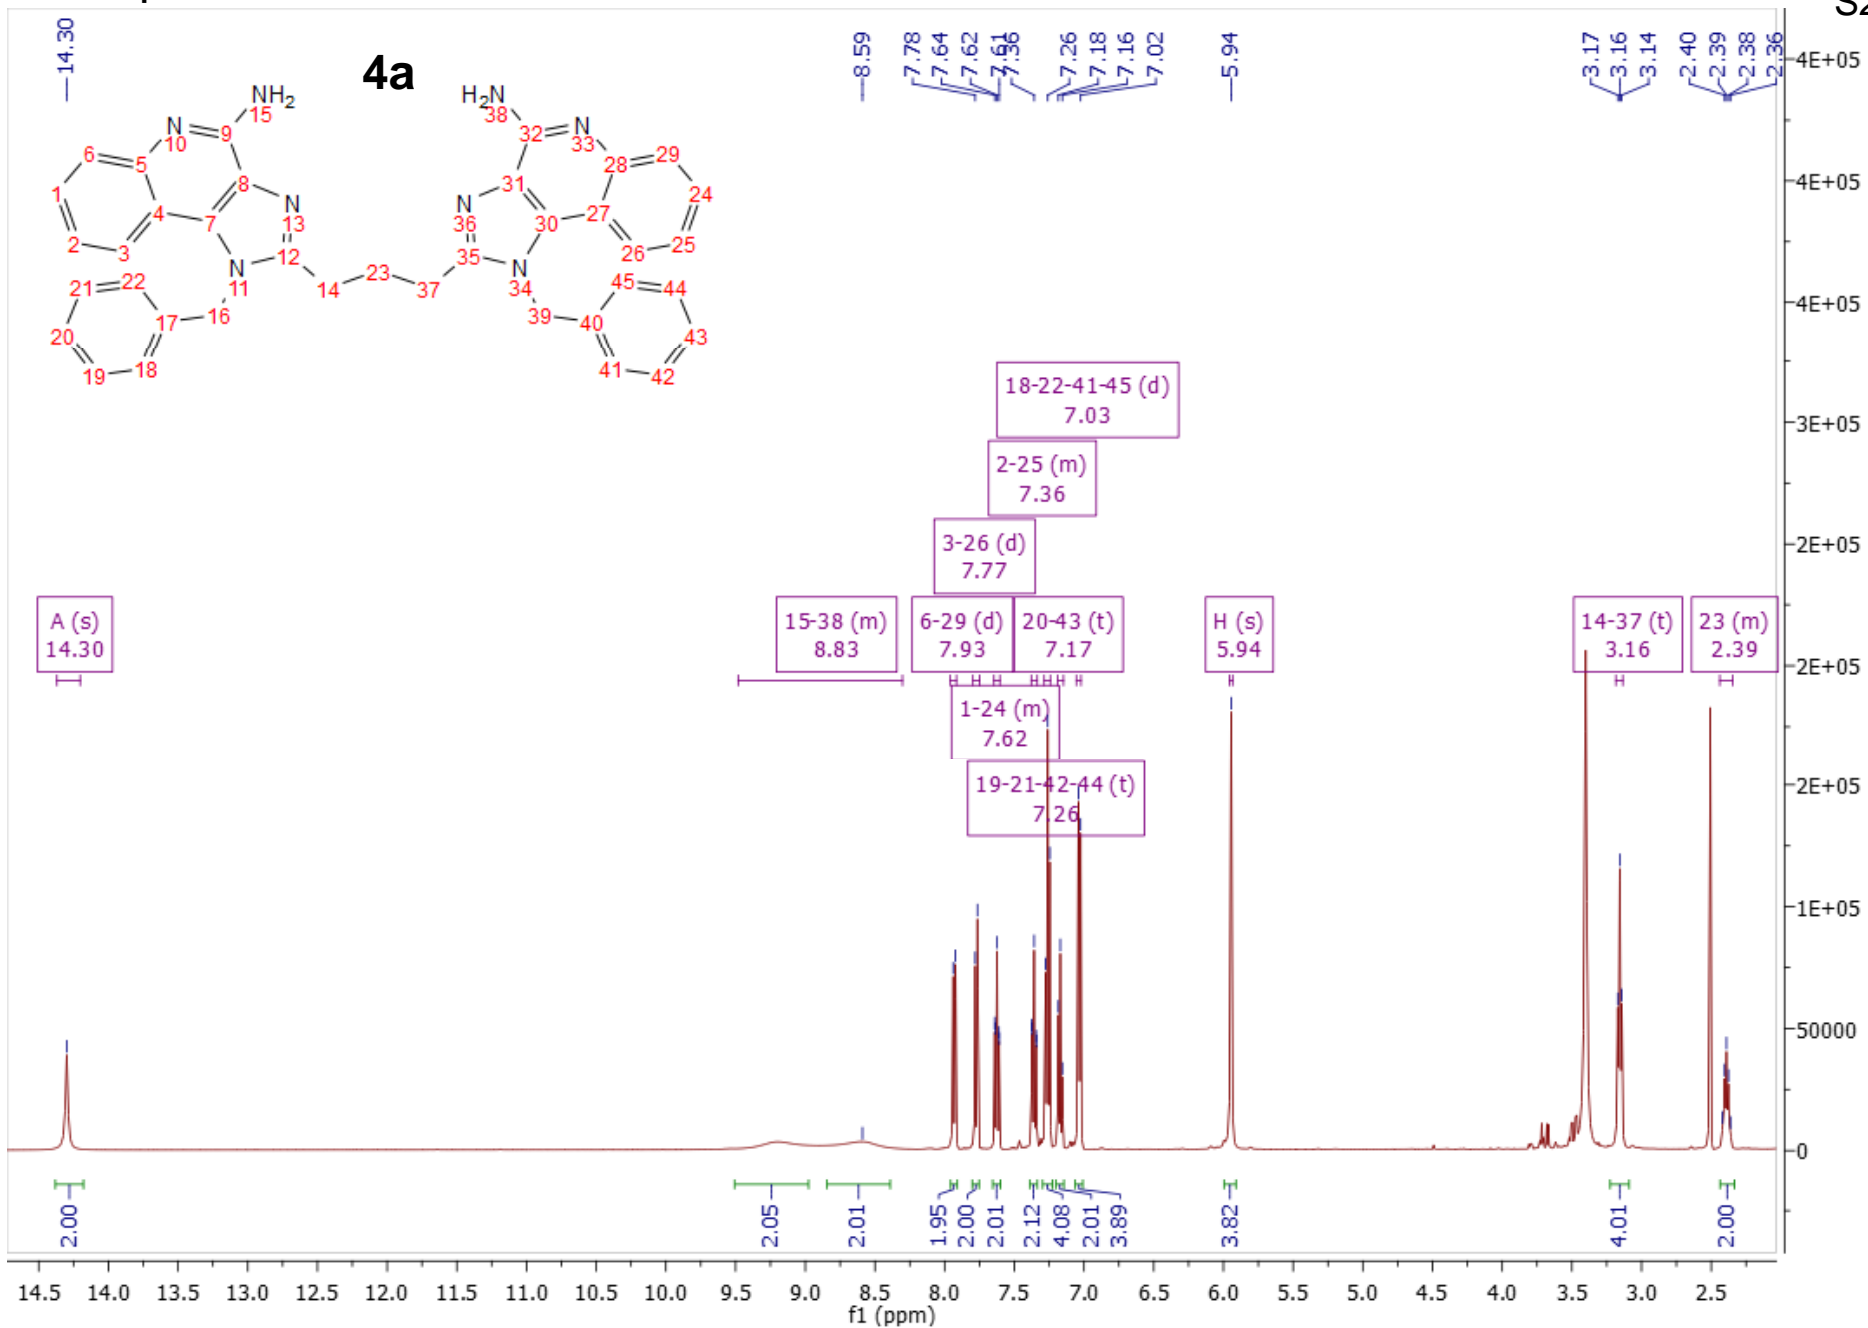

# <sup>13</sup>C Spectrum

S3

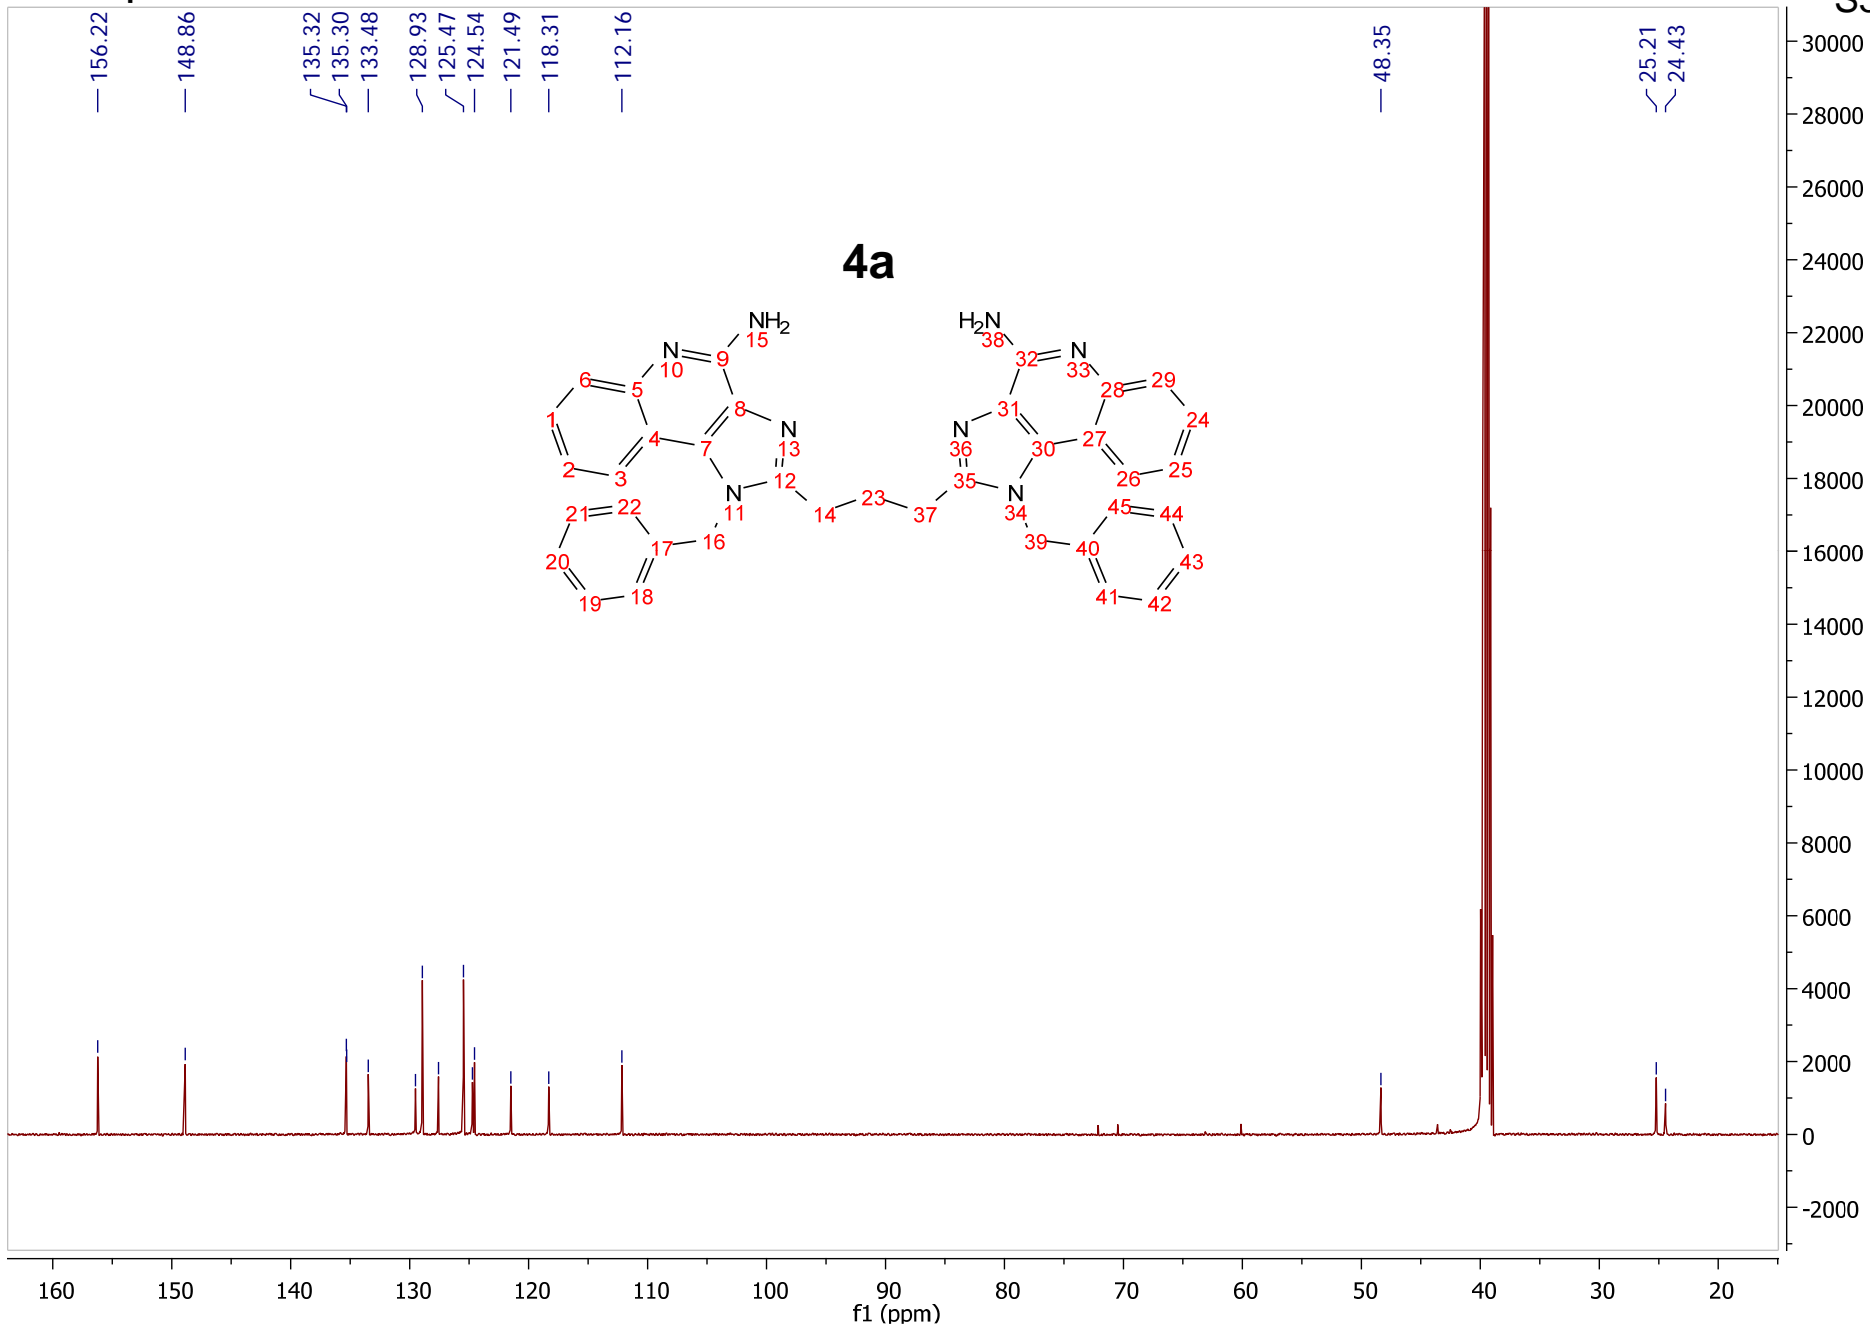

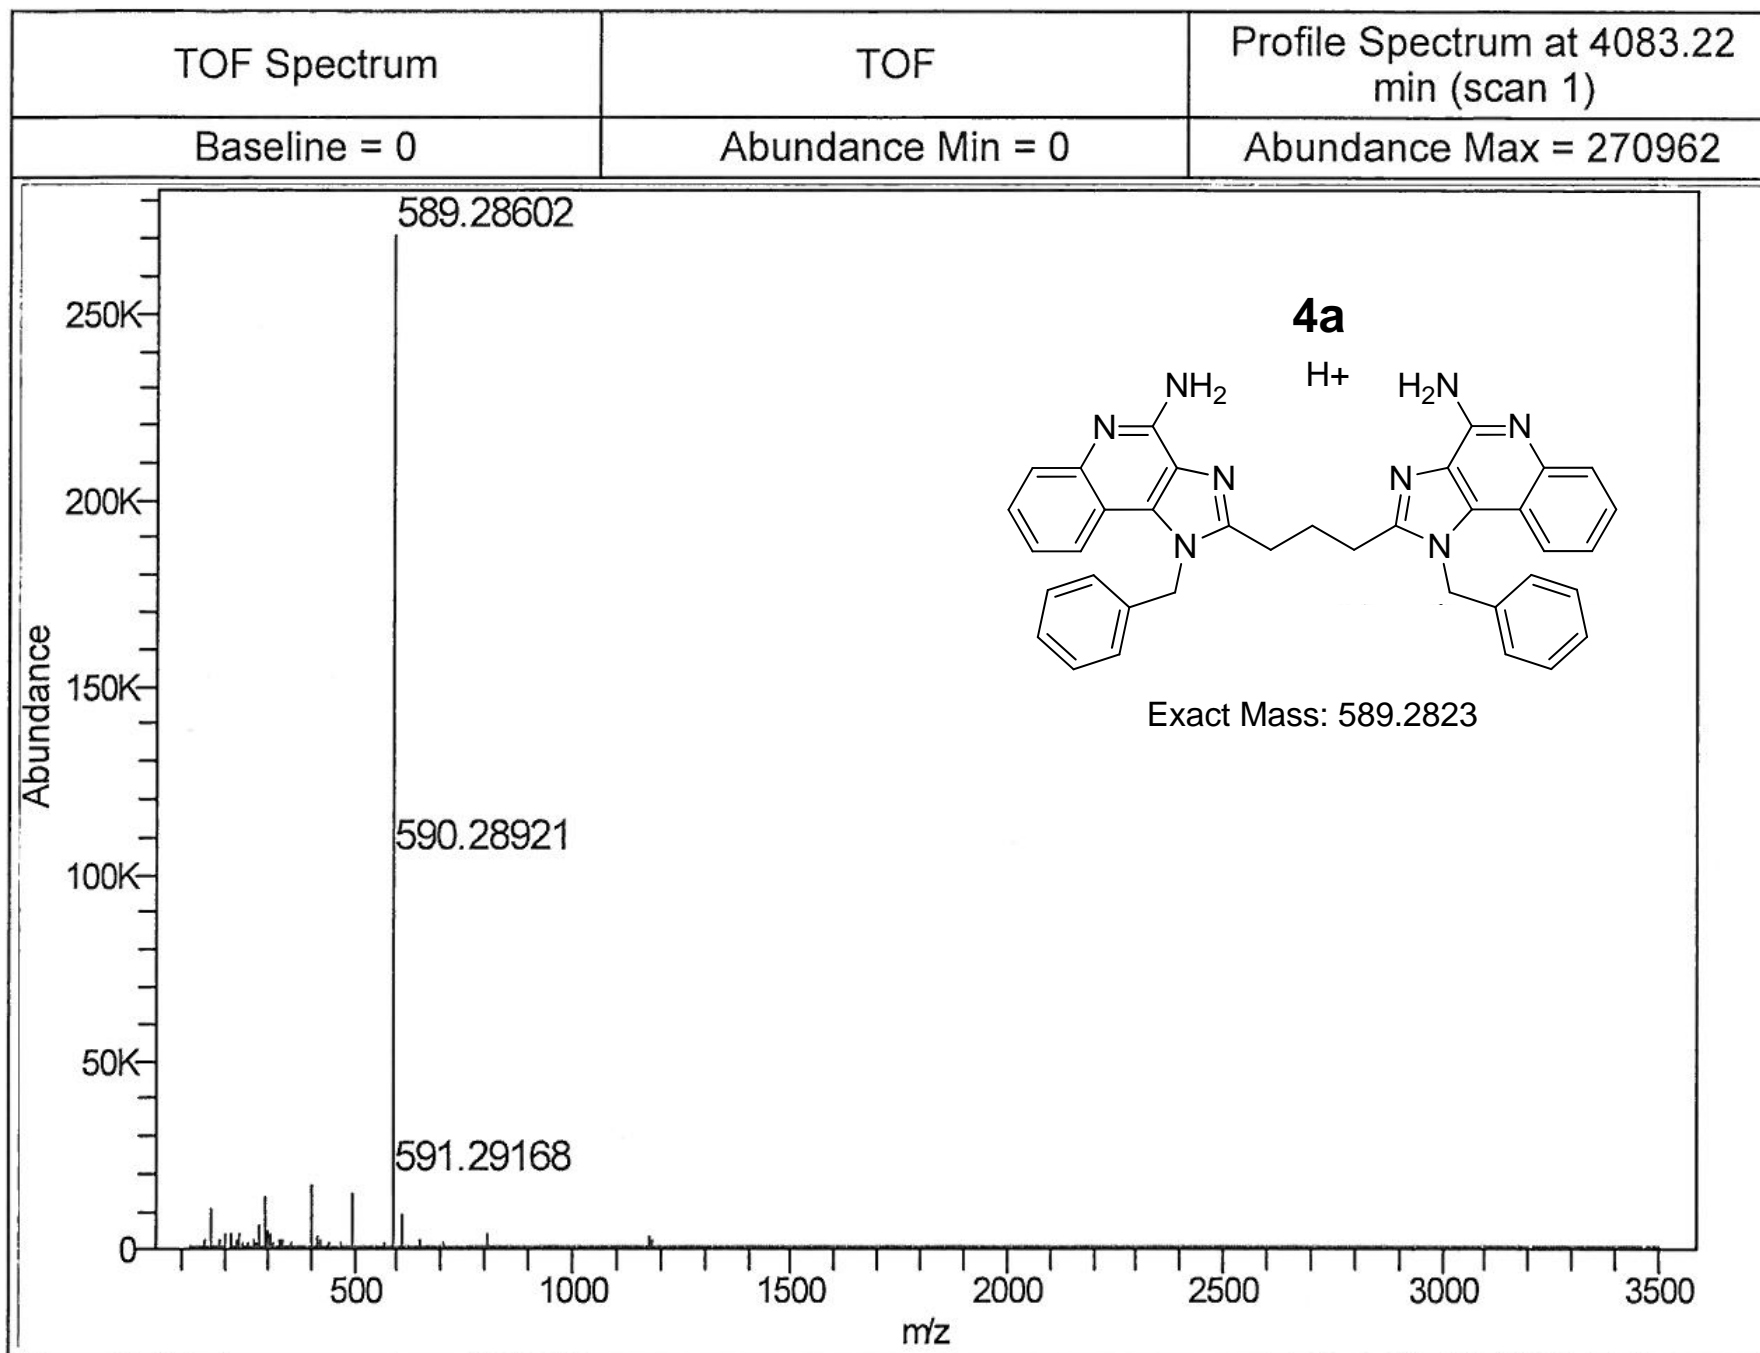

# <sup>1</sup>H Spectrum

S5

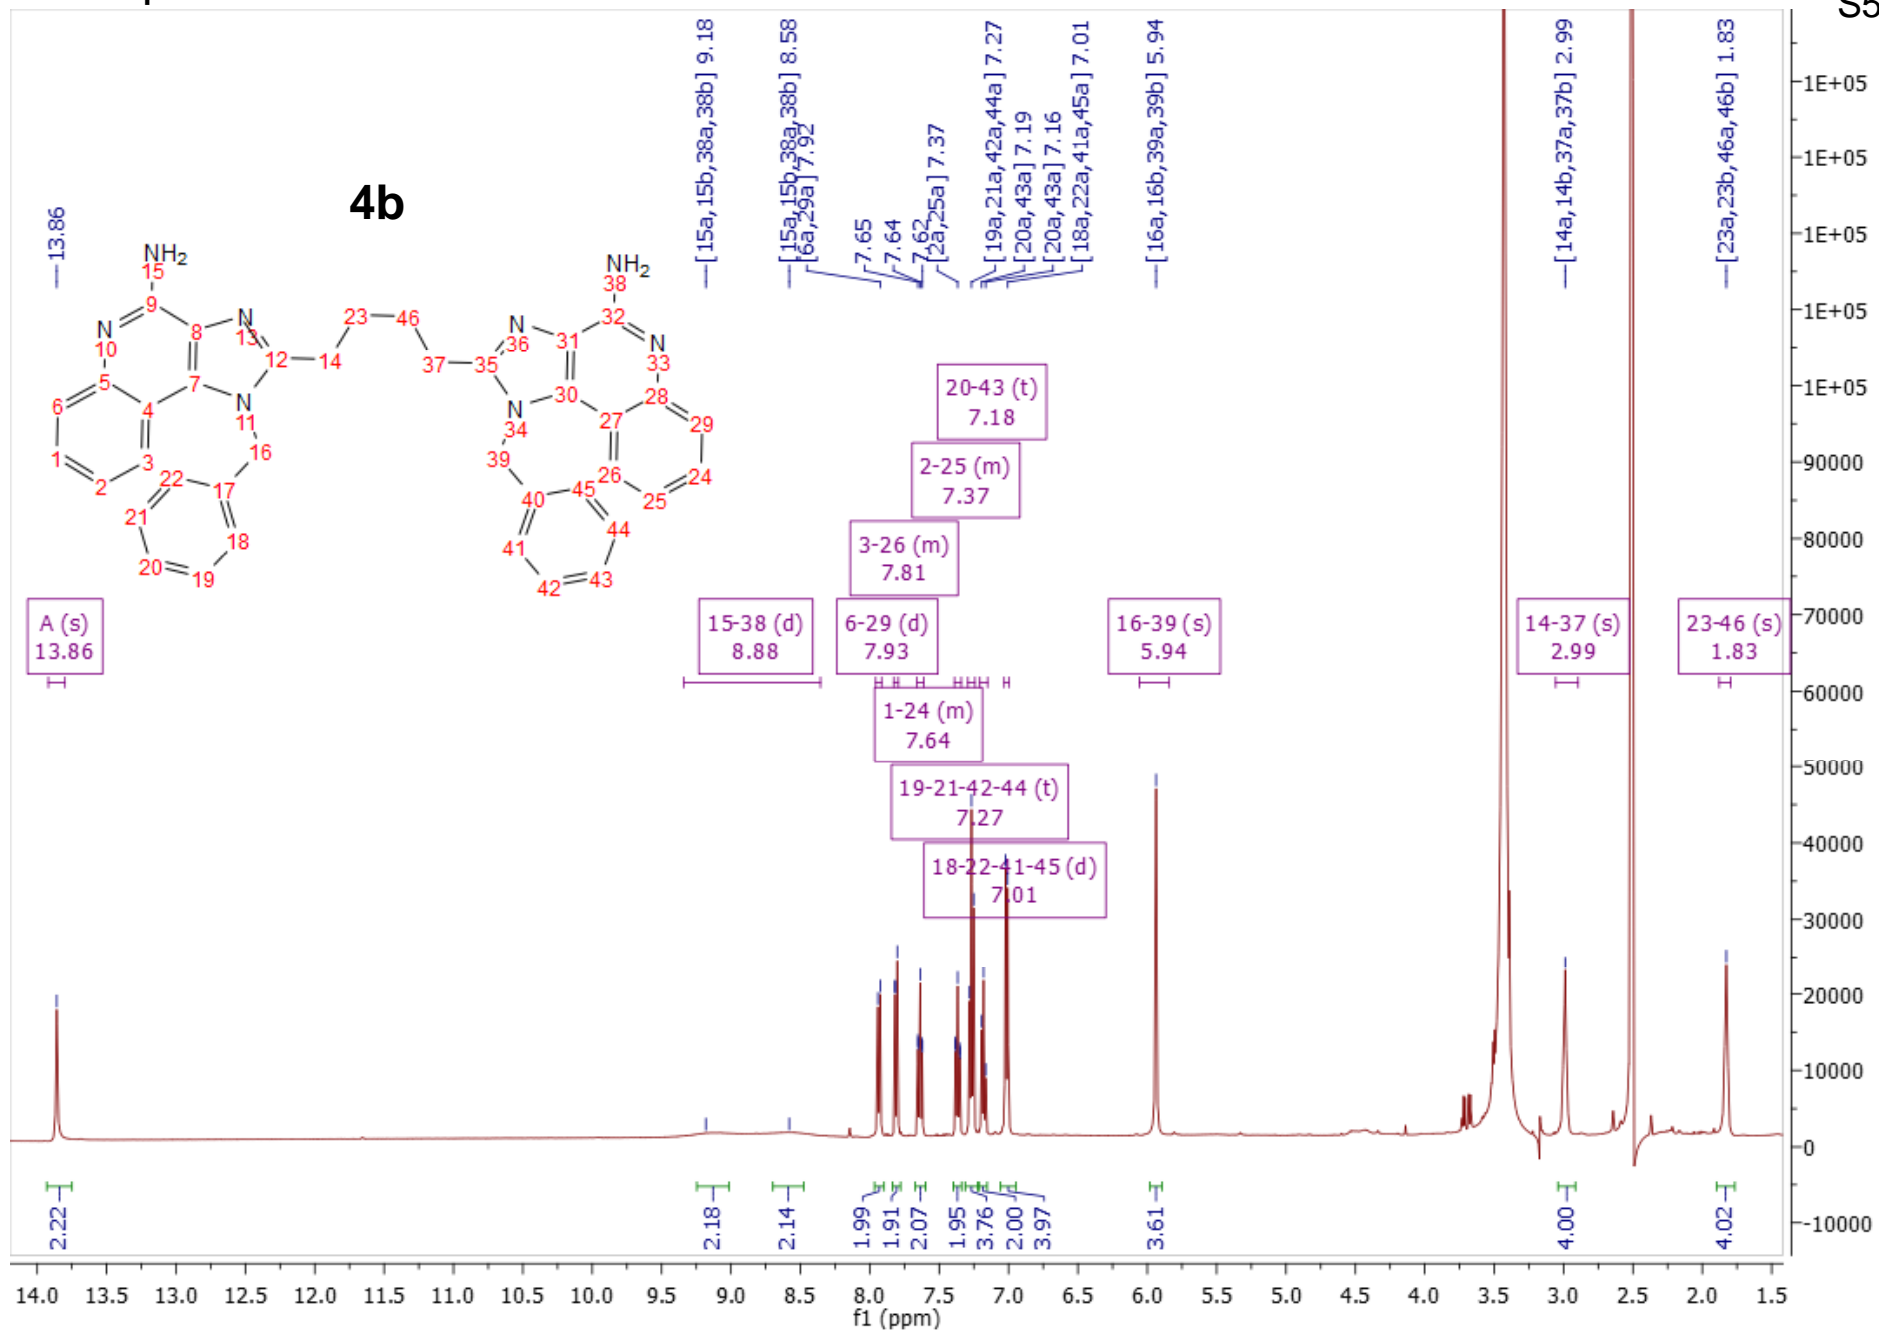

# <sup>13</sup>C Spectrum

S6

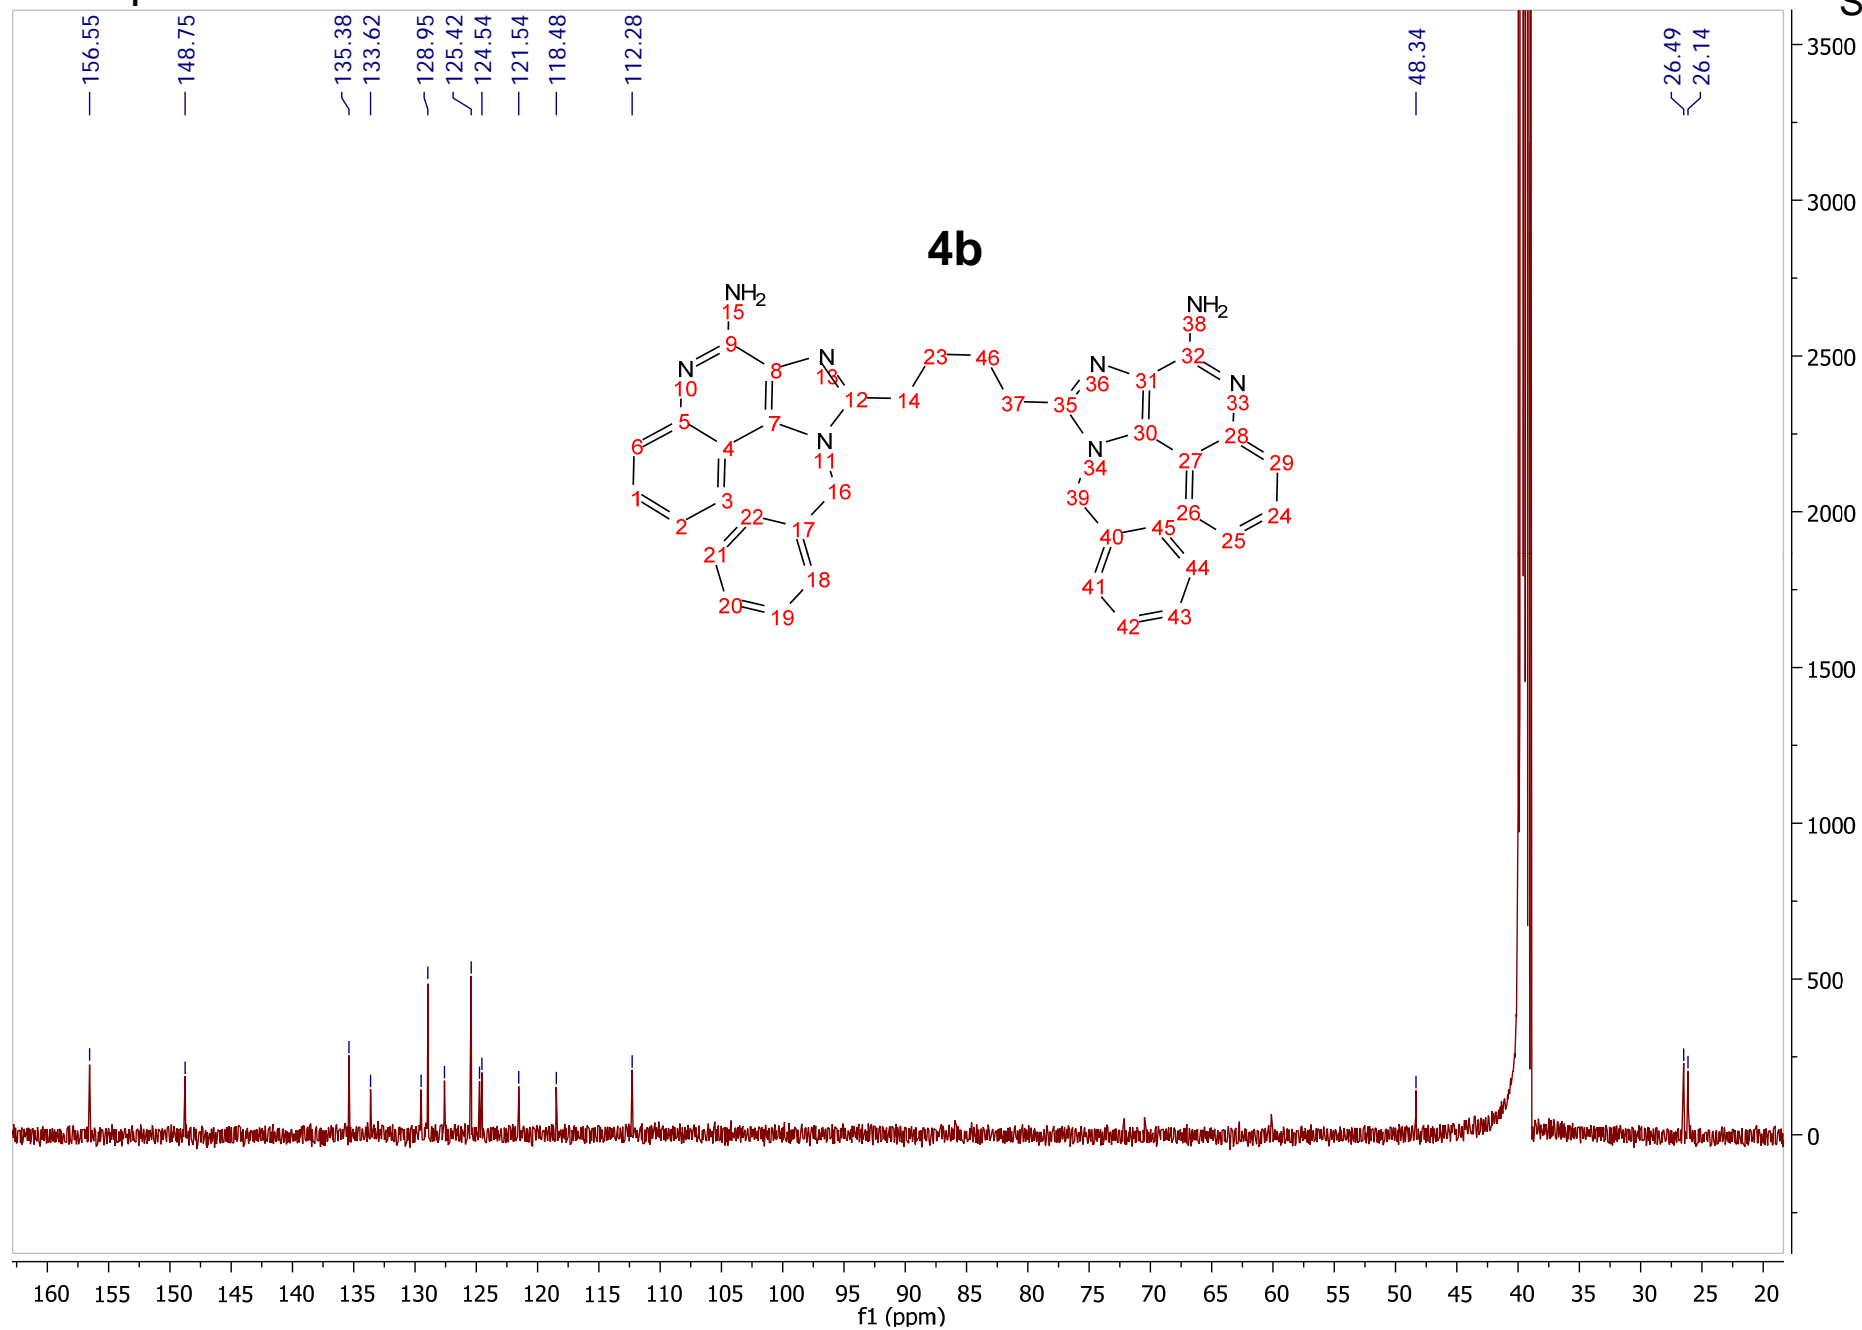

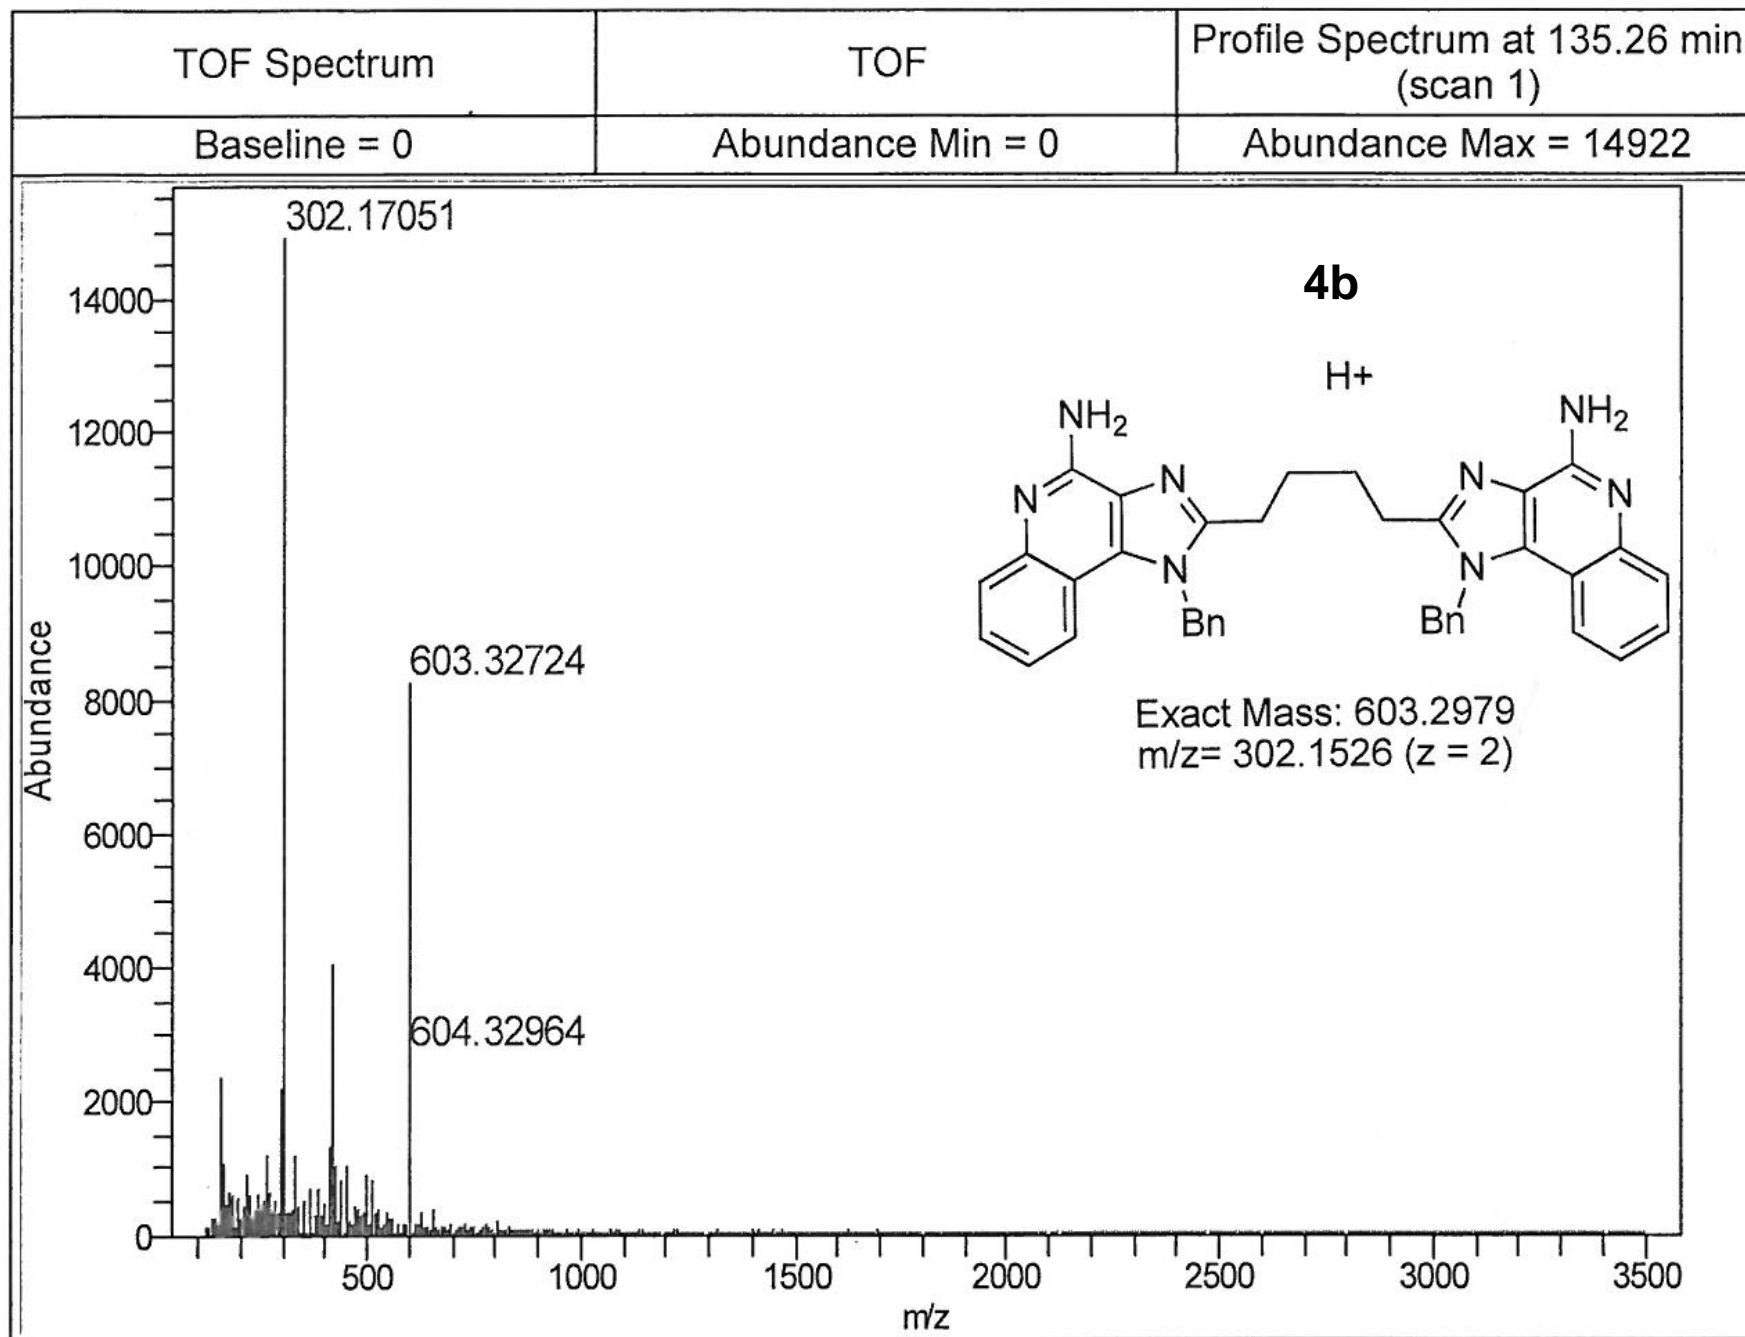

# <sup>1</sup>H Spectrum

S8

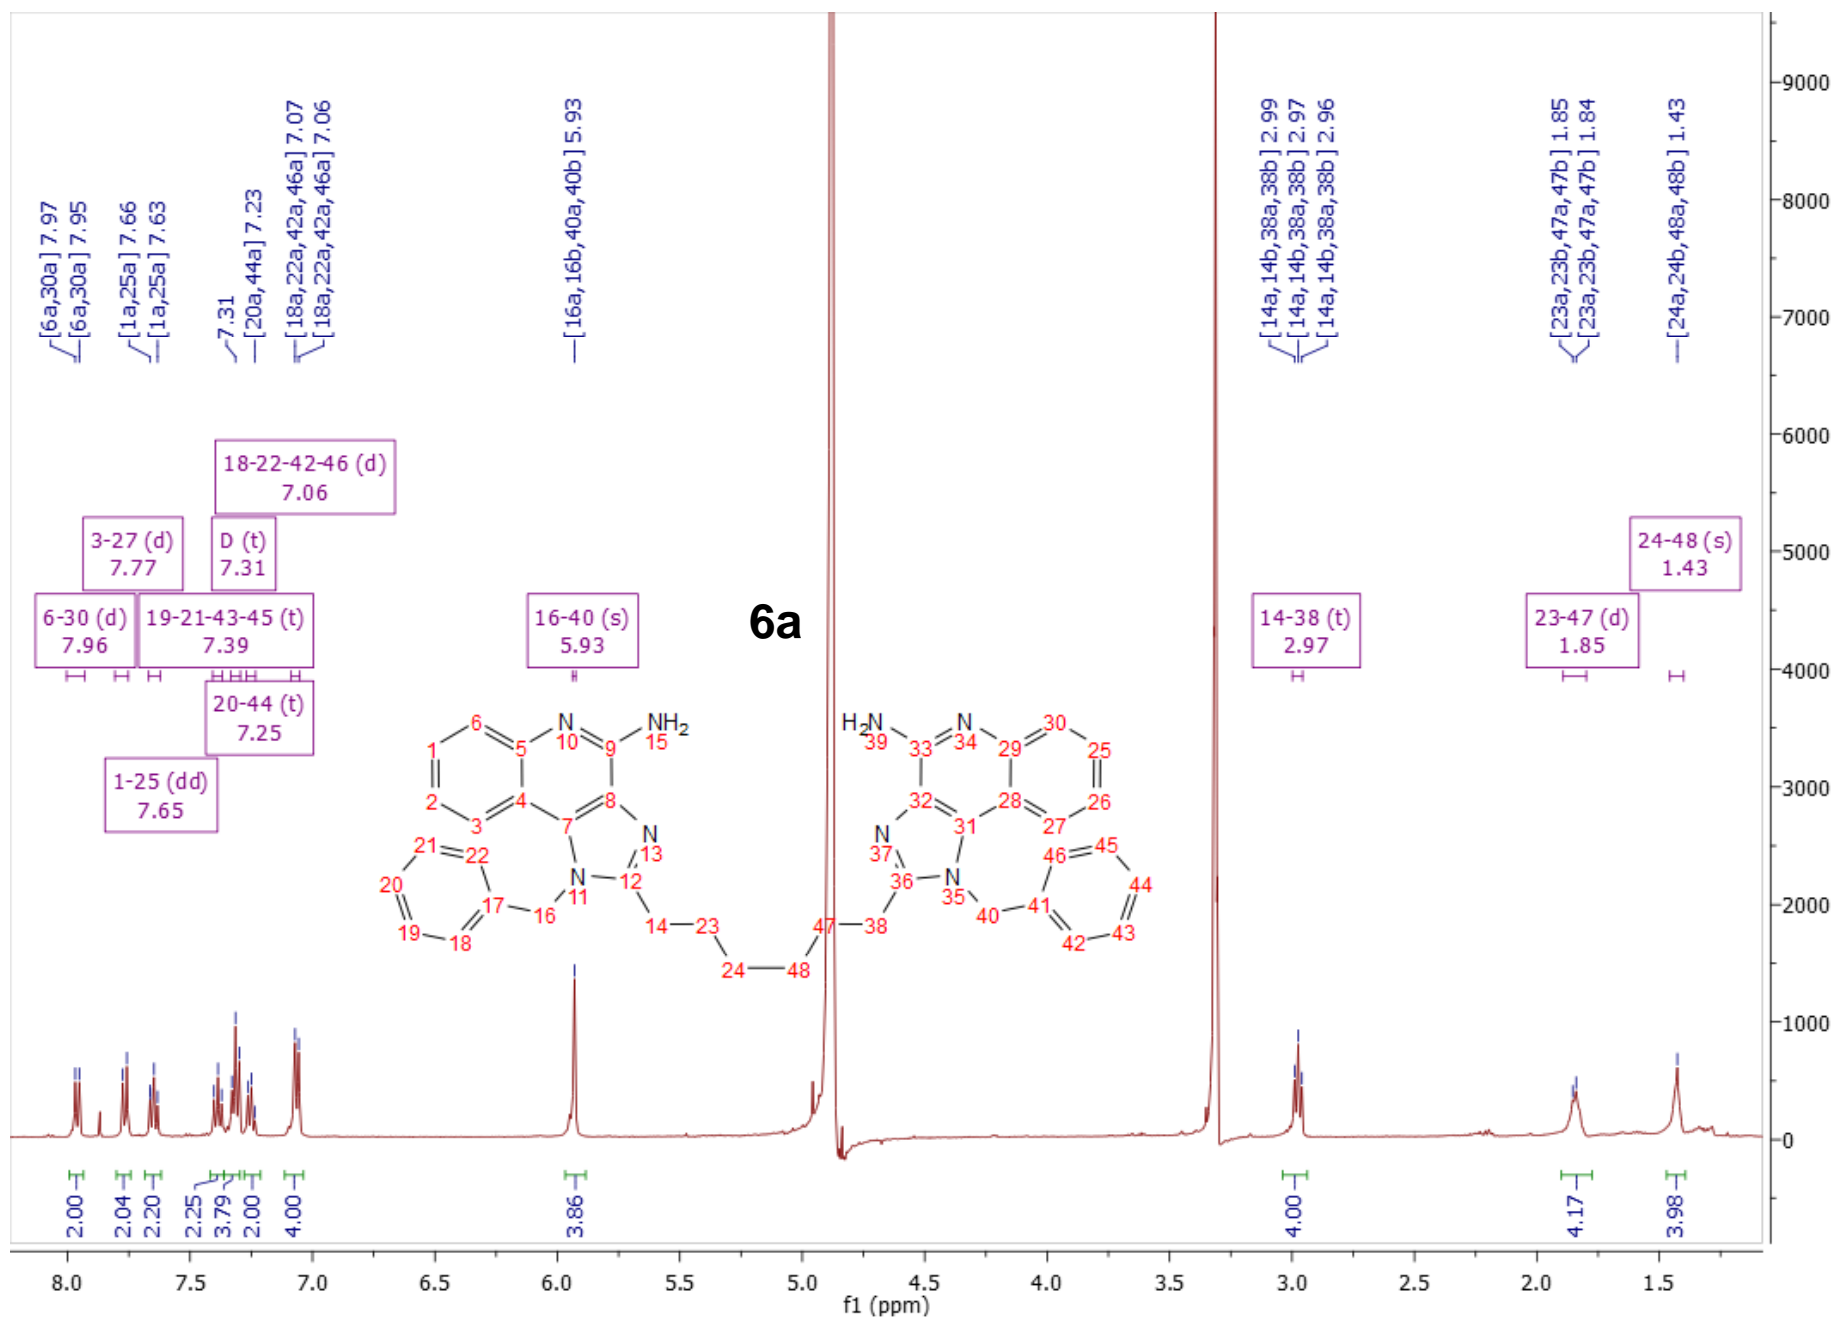



# <sup>13</sup>C Spectrum

S9

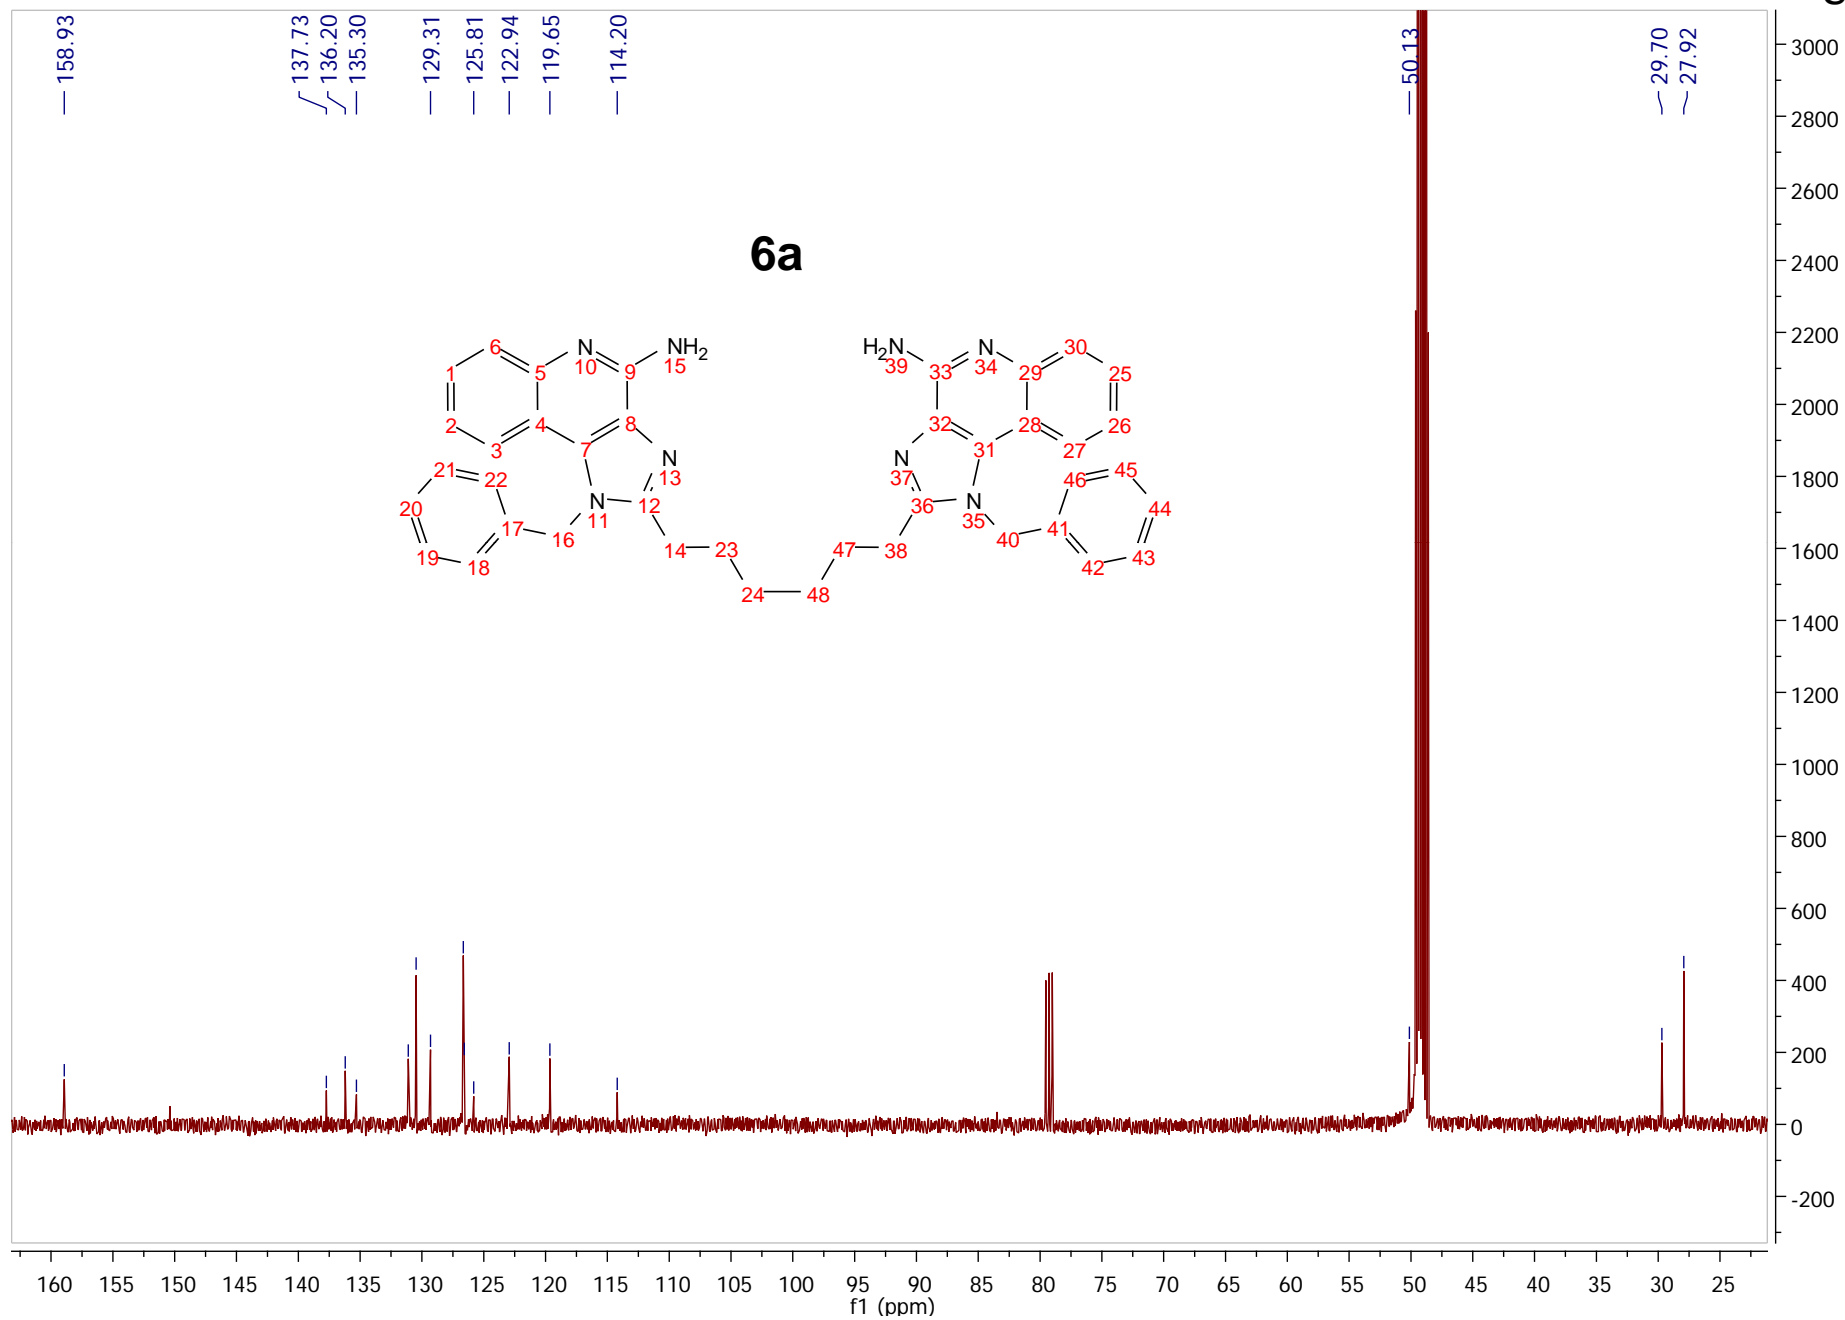

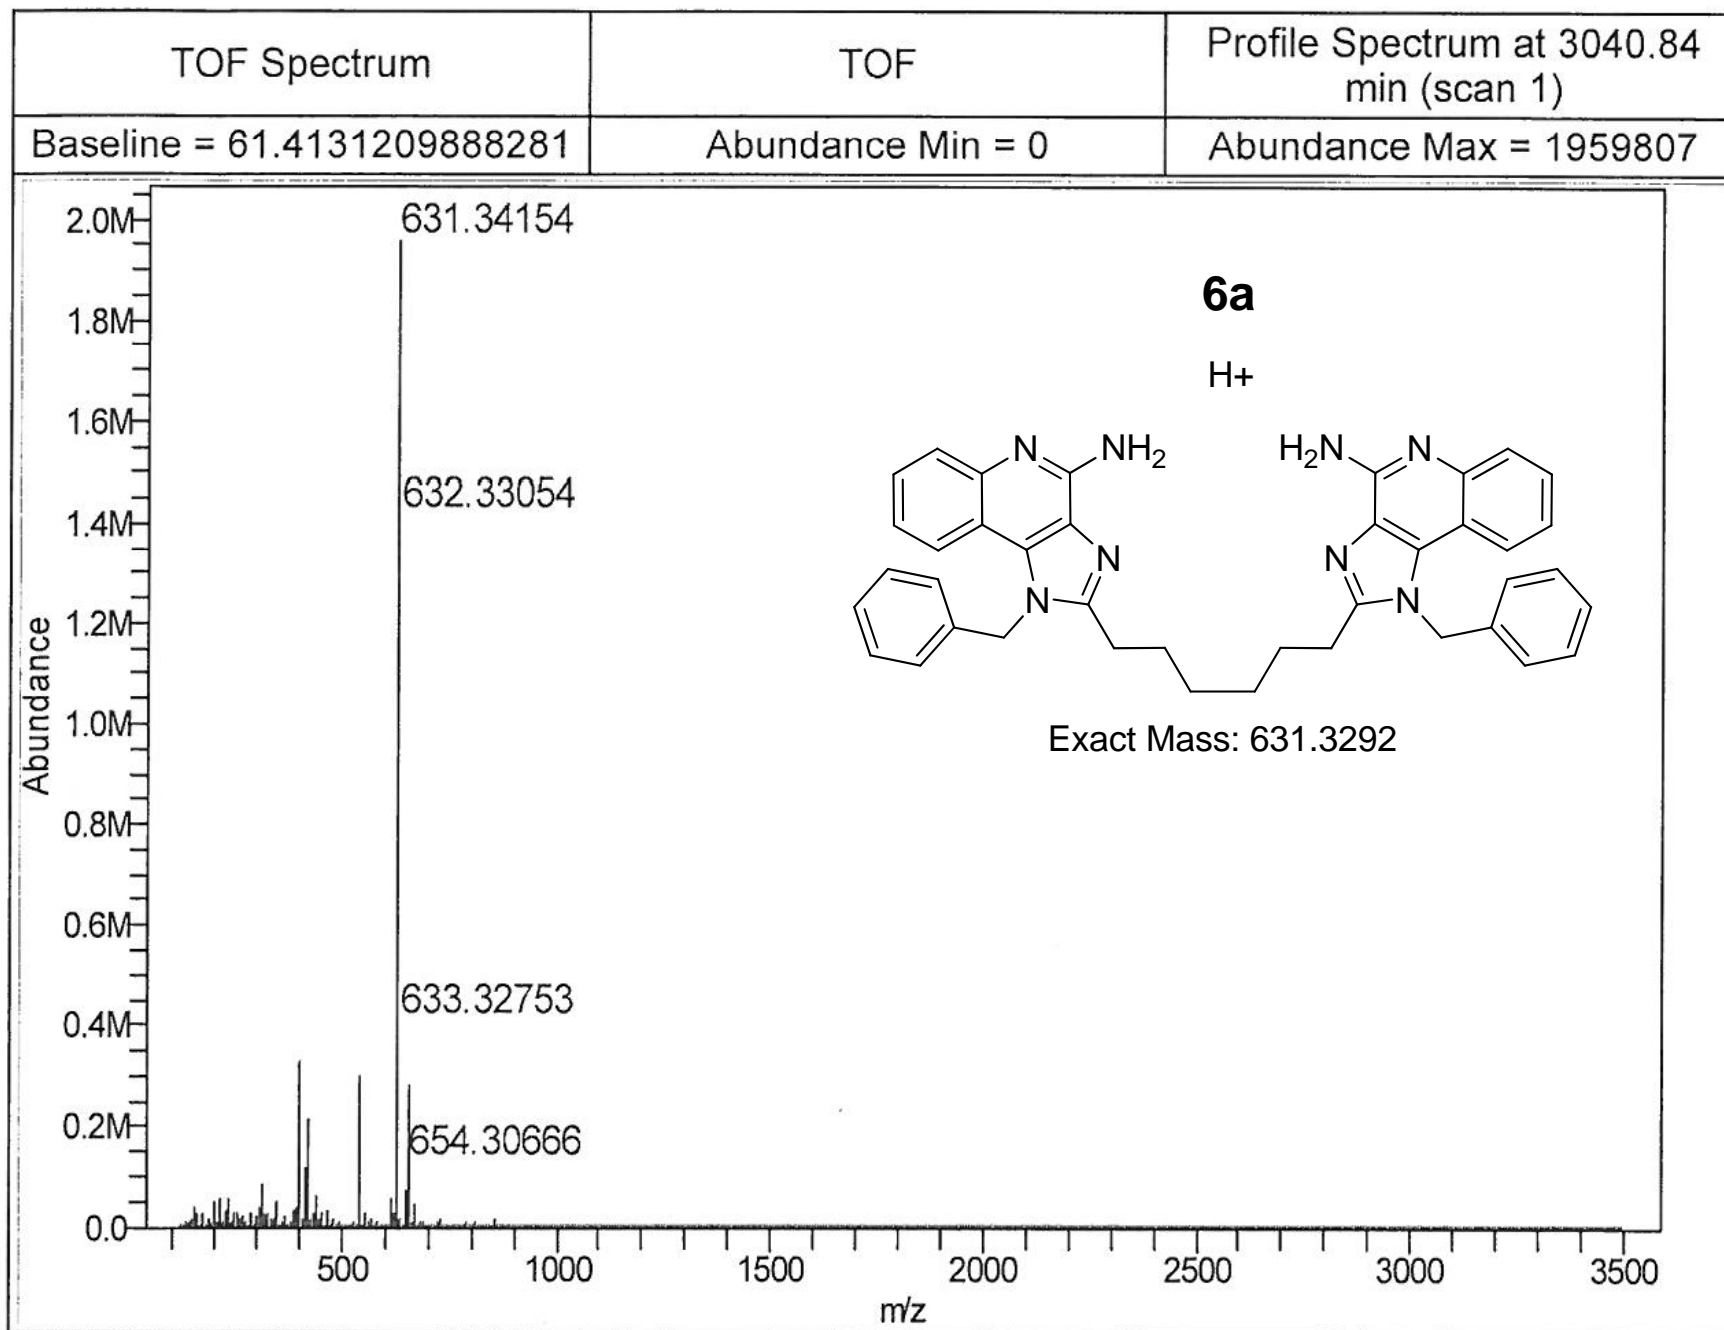

# <sup>1</sup>H Spectrum

S11

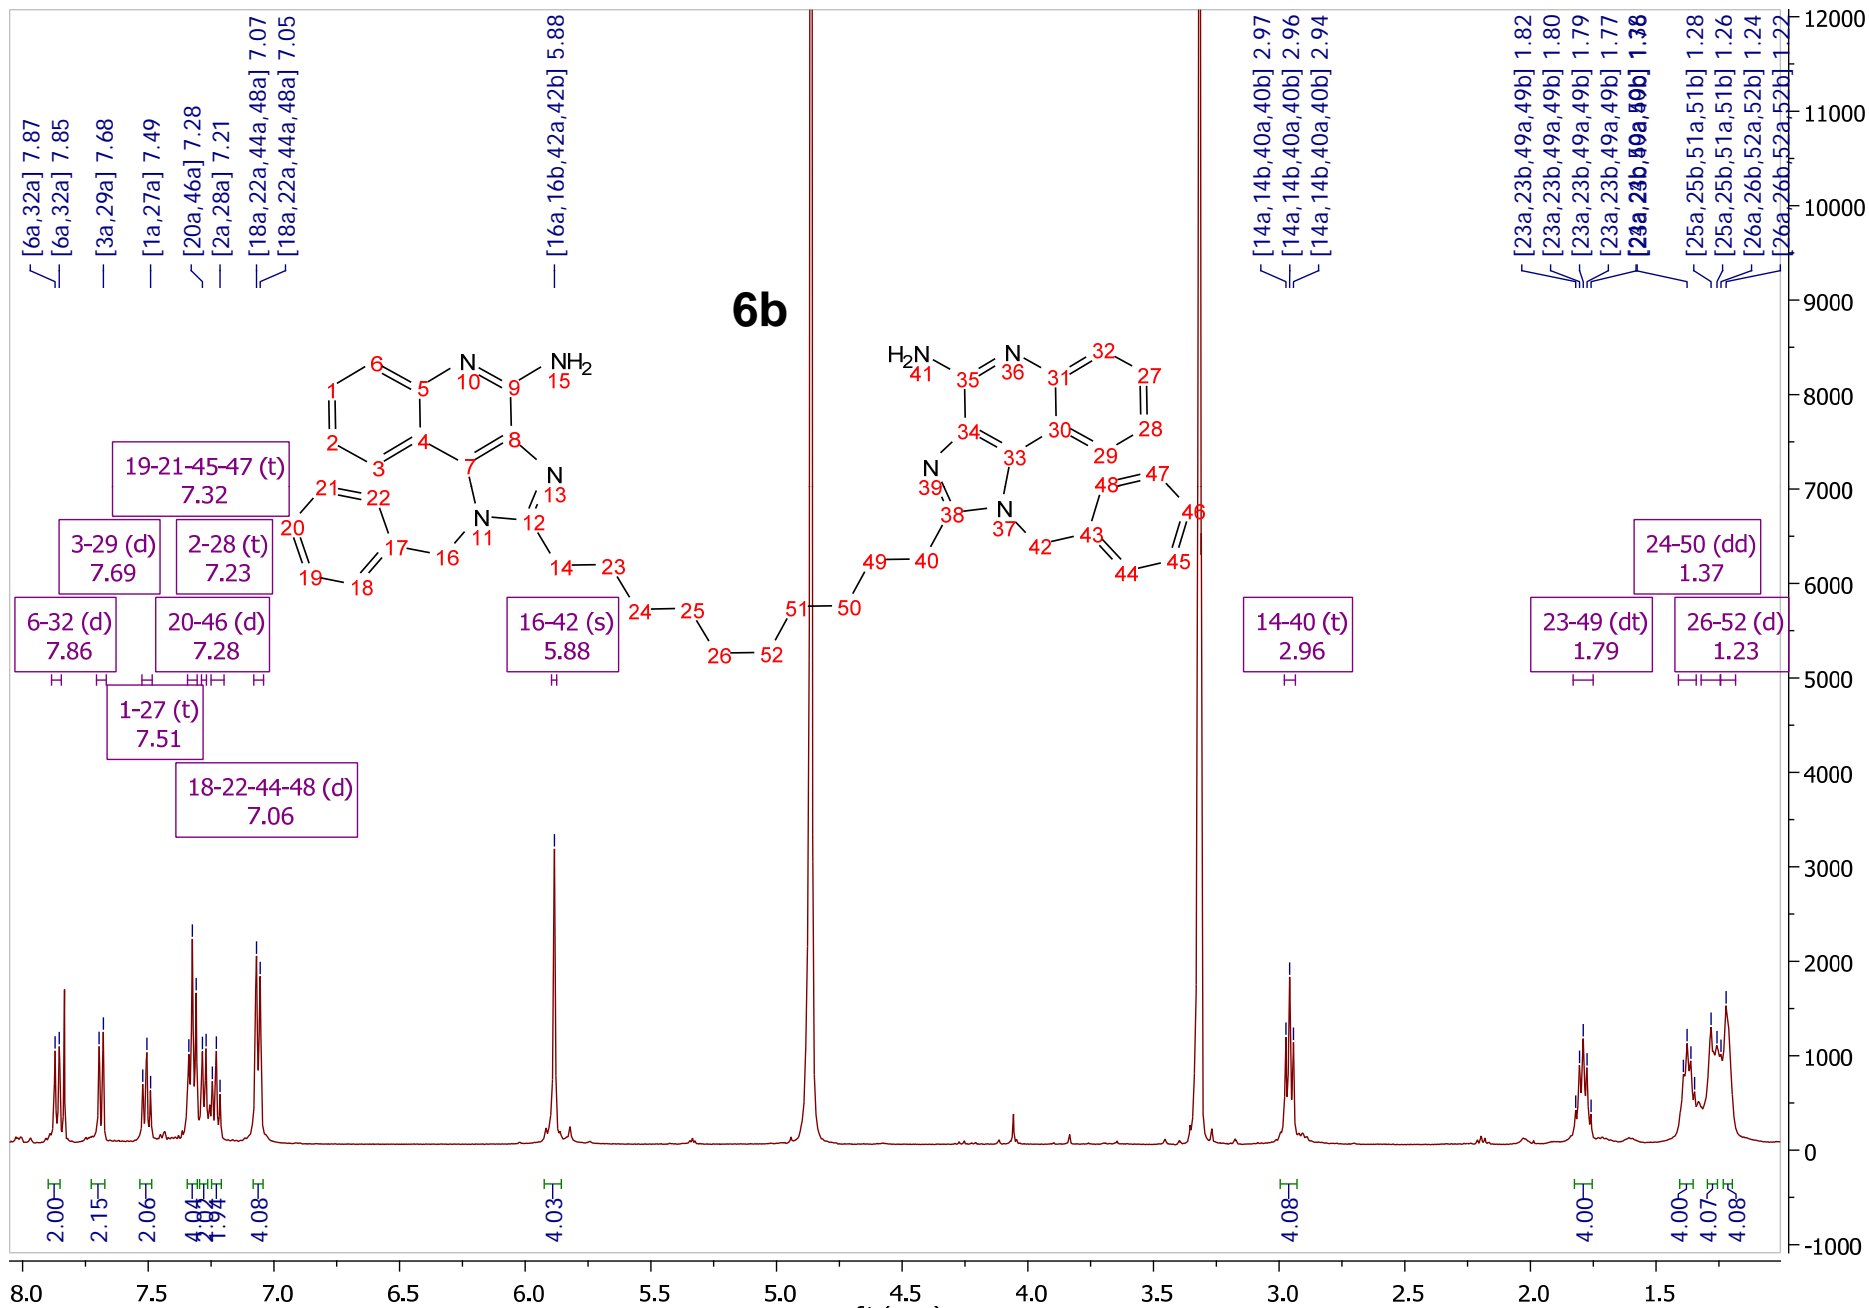

# <sup>13</sup>C Spectrum

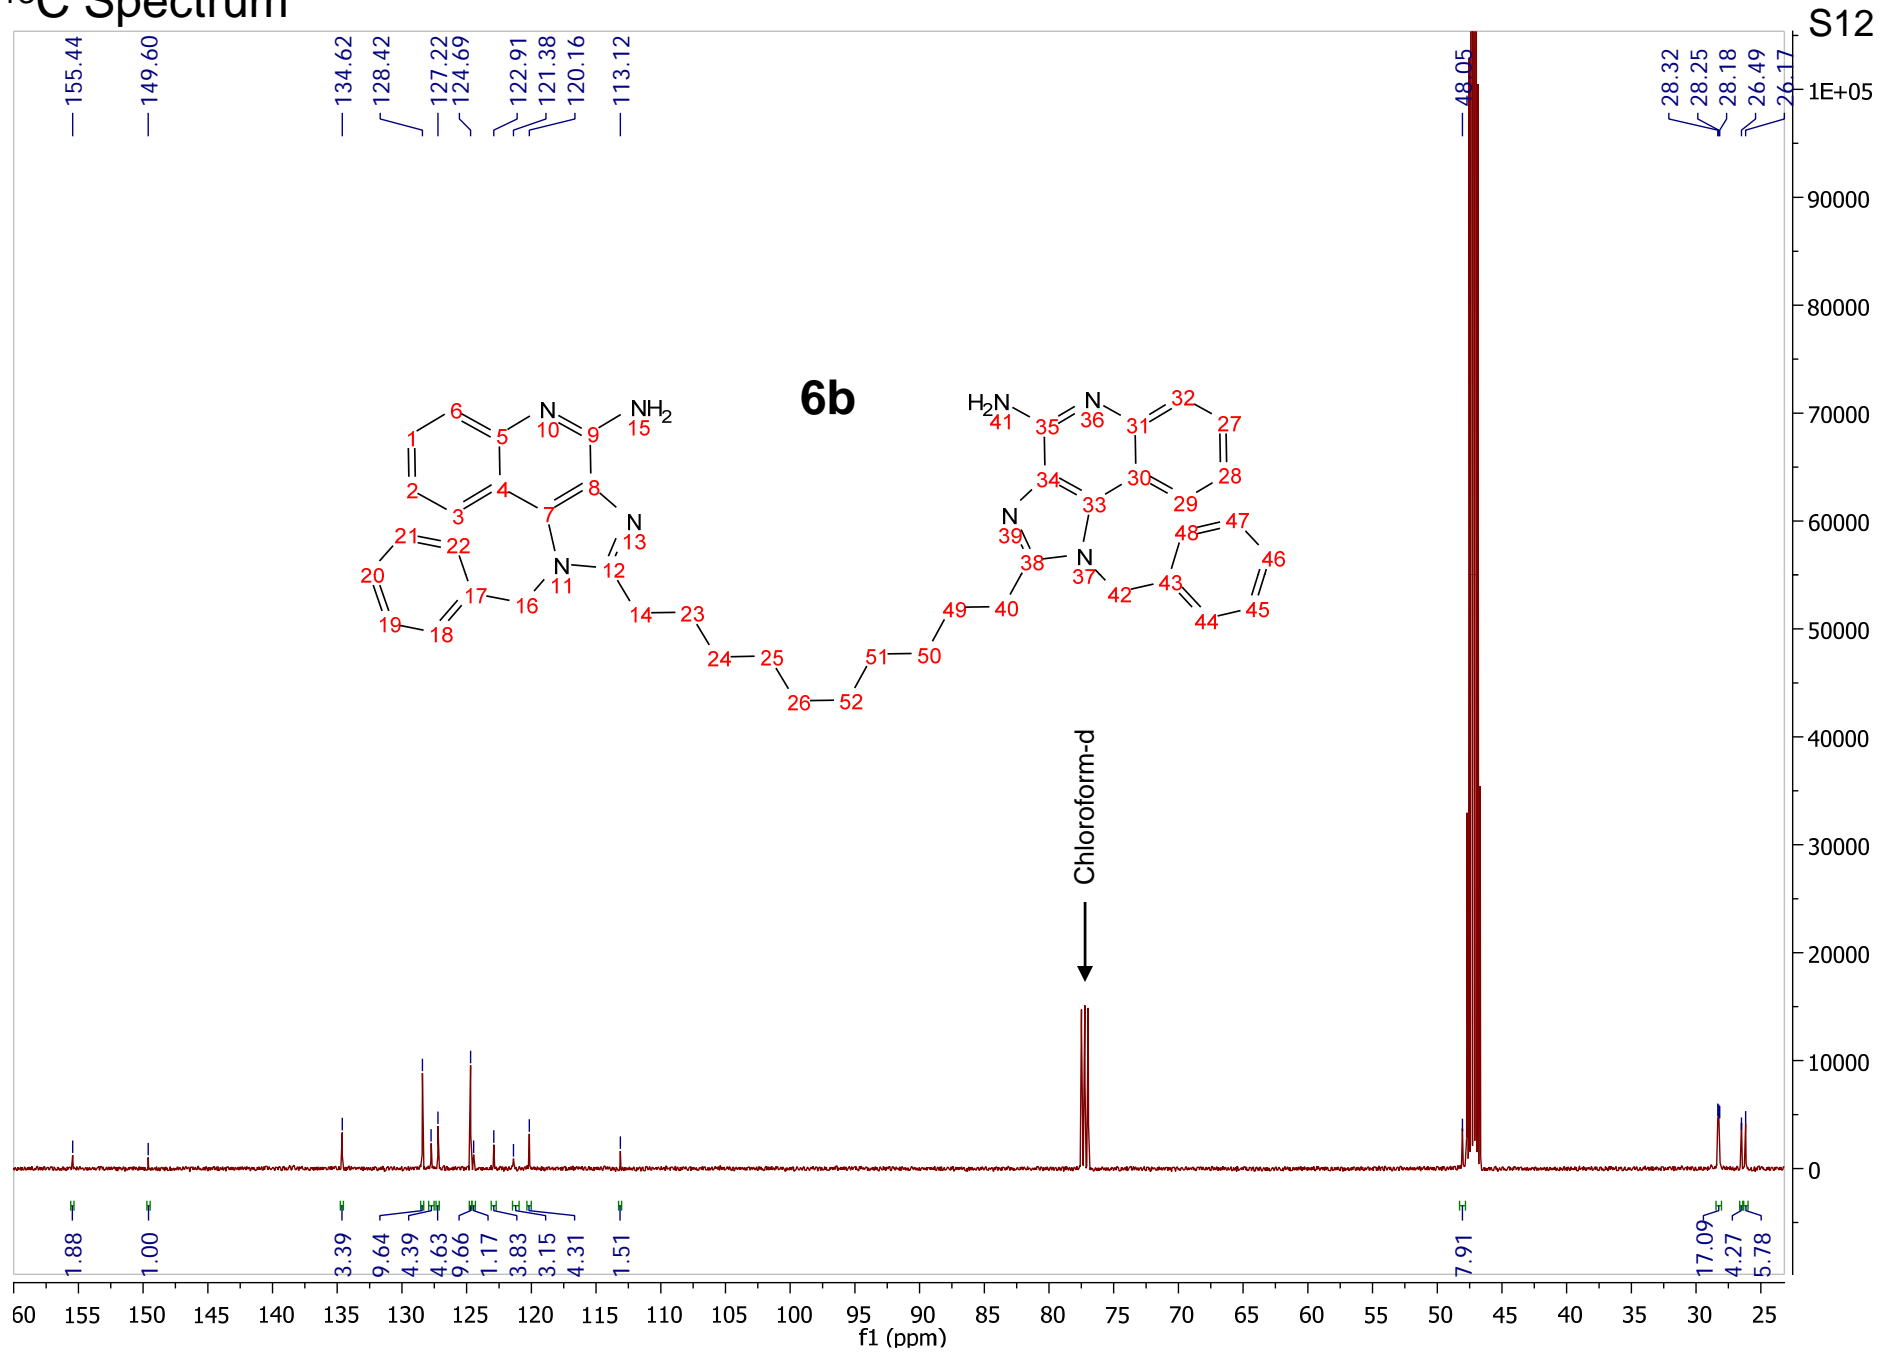

S12

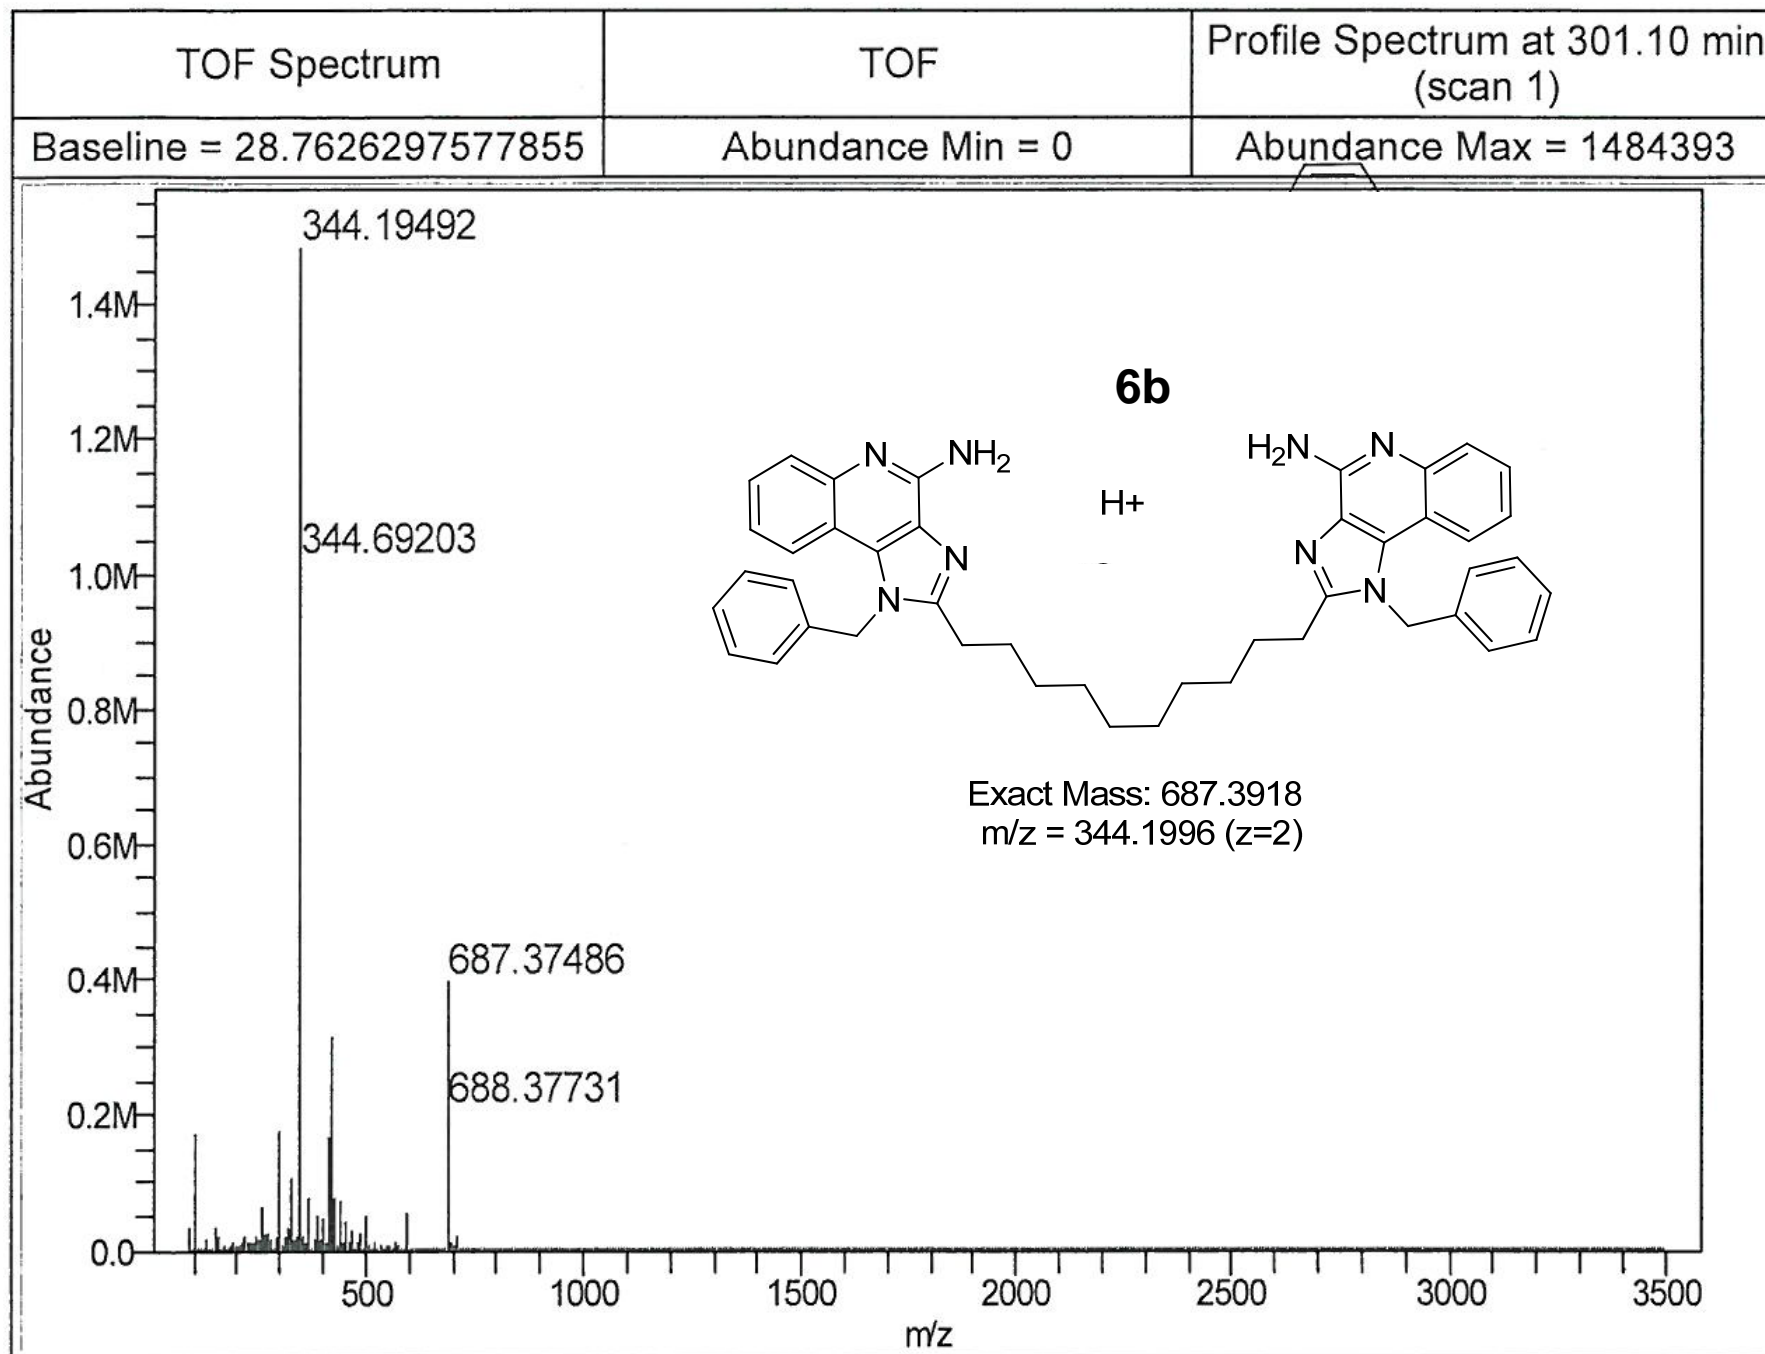

# <sup>1</sup>H Spectrum

S14

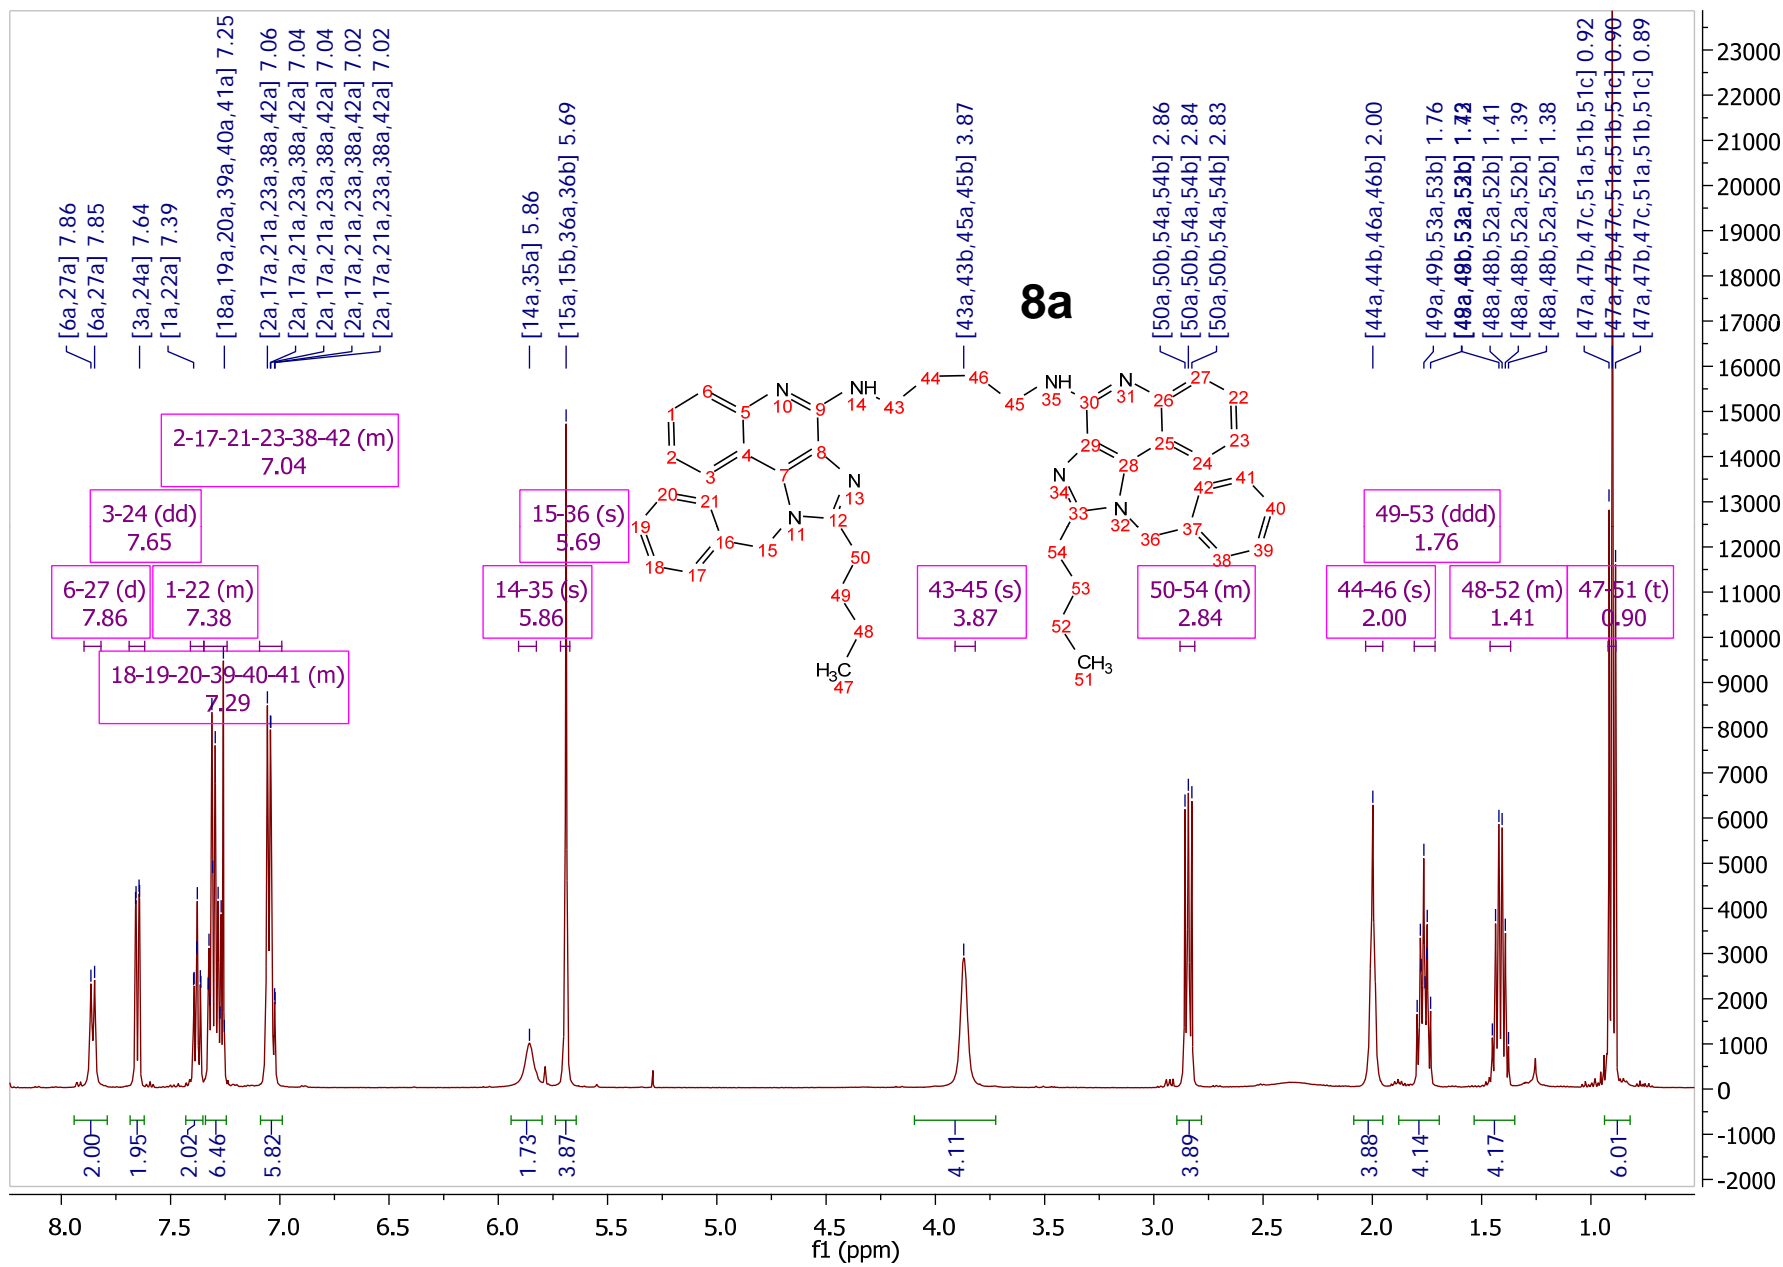

# <sup>13</sup>C Spectrum

S15

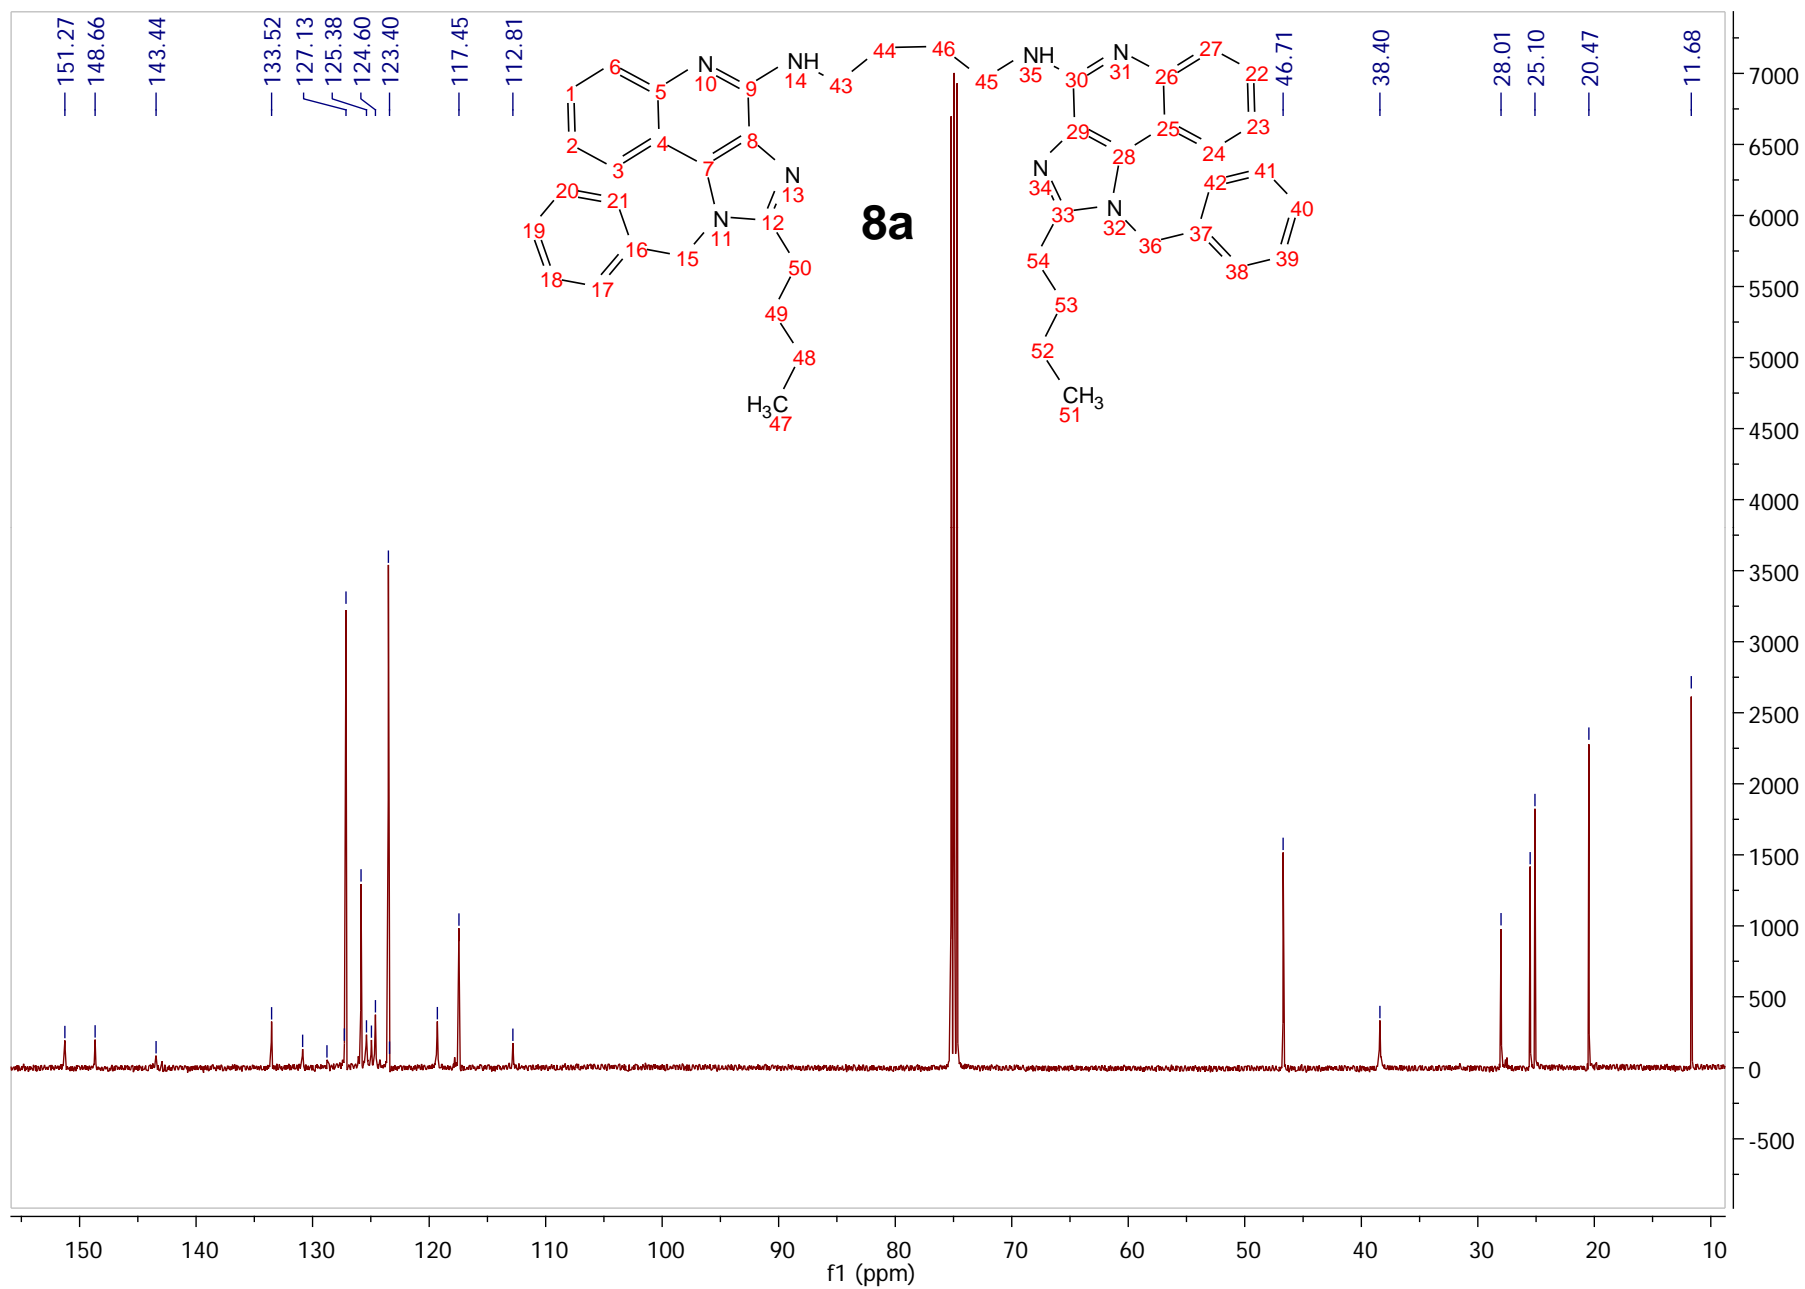

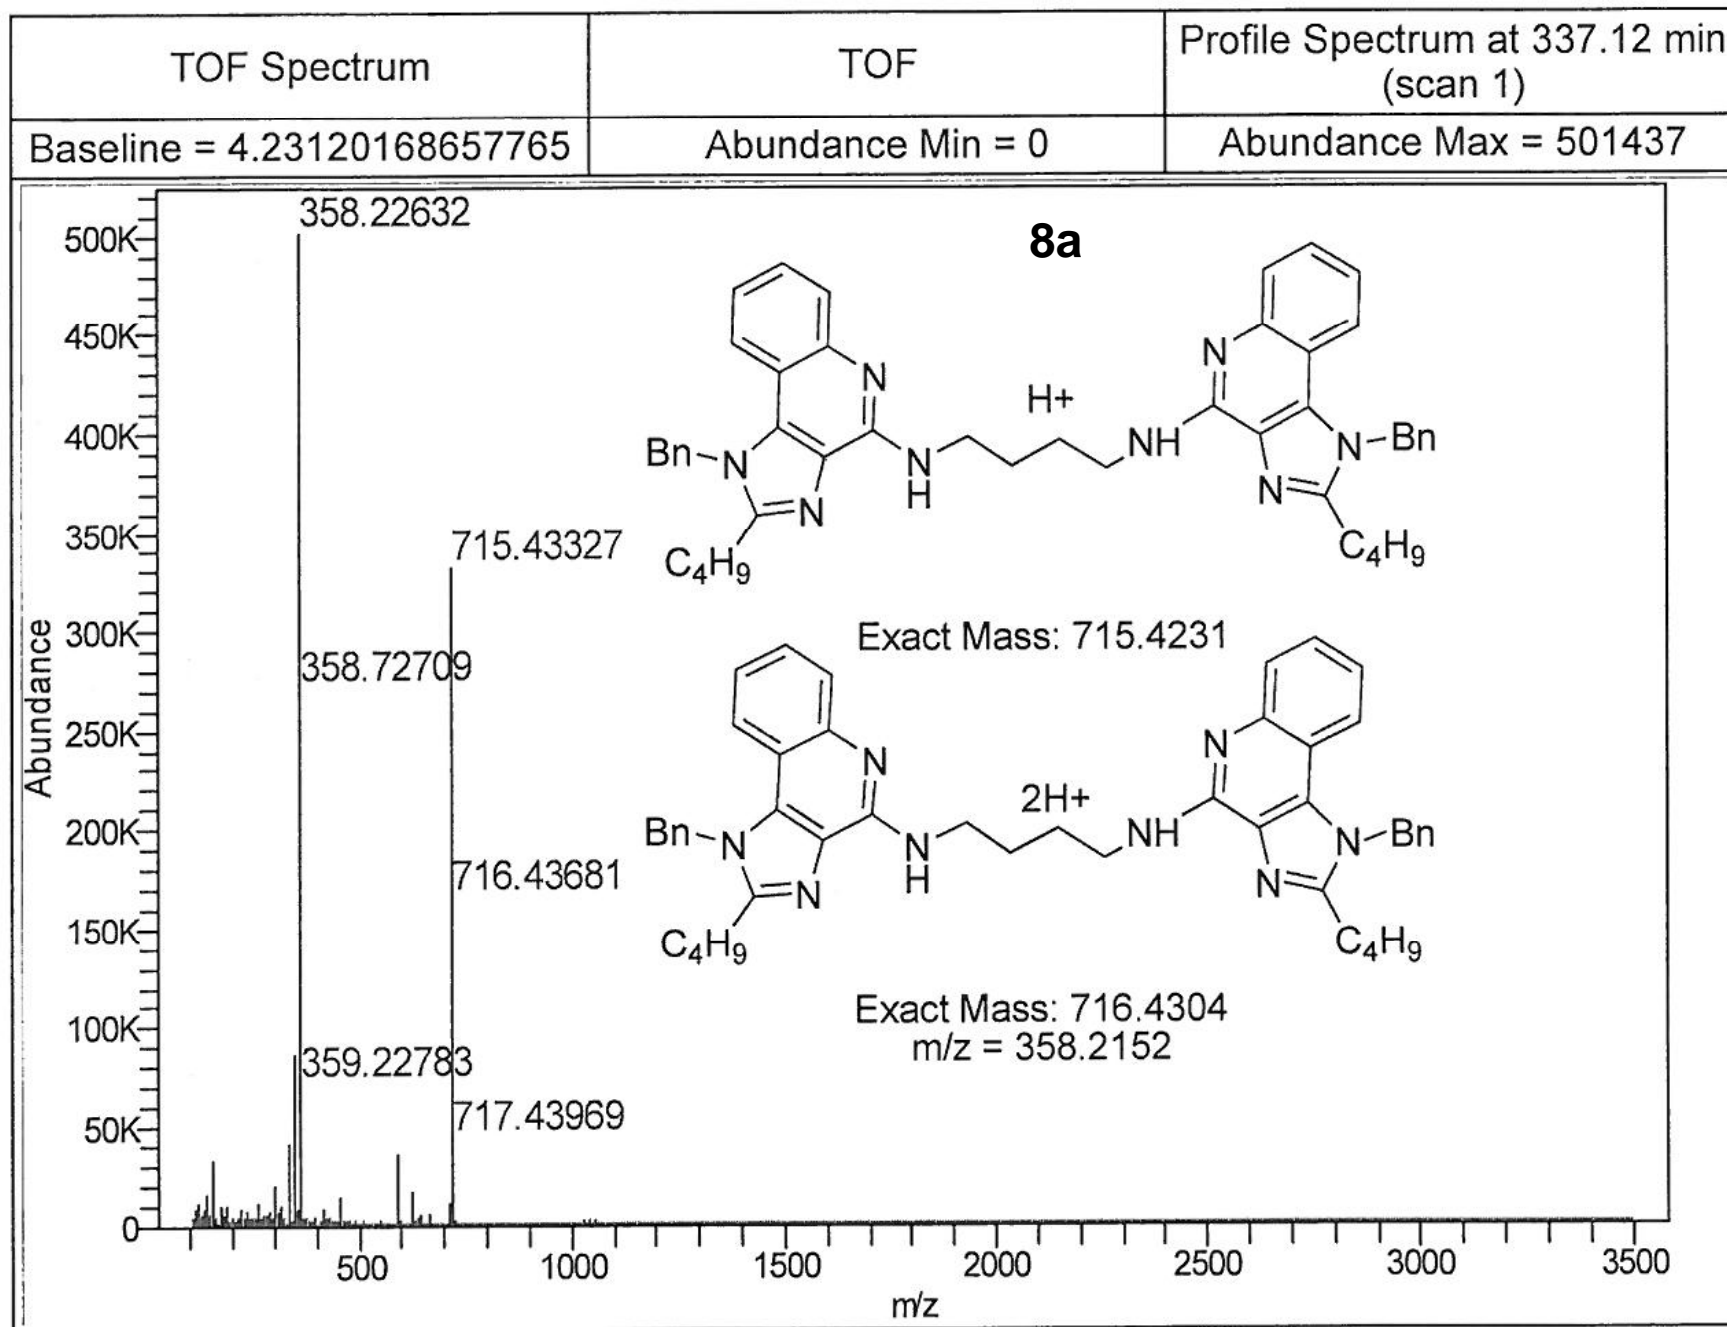



# <sup>1</sup>H Spectrum

S17

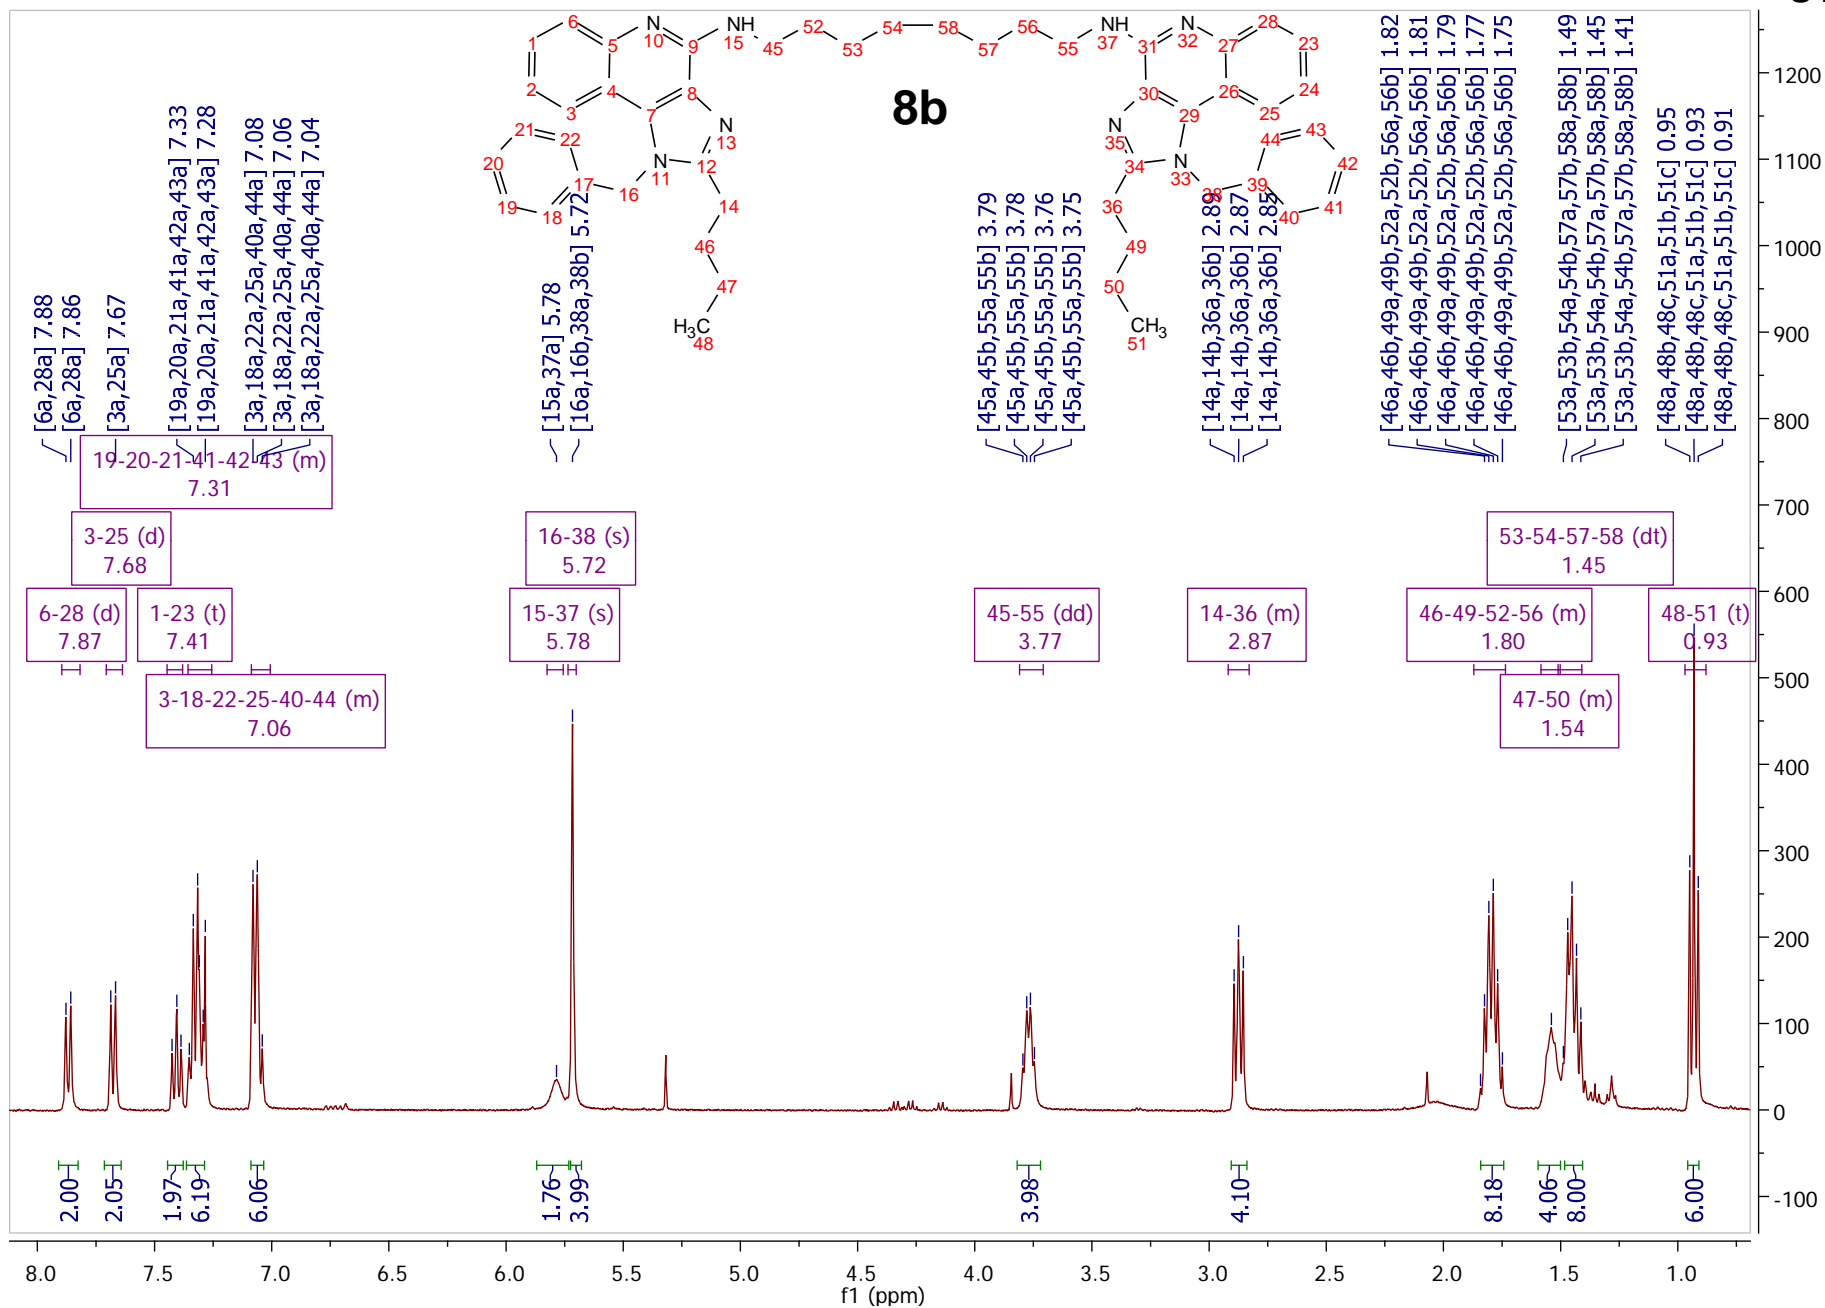

# <sup>13</sup>C Spectrum

S18

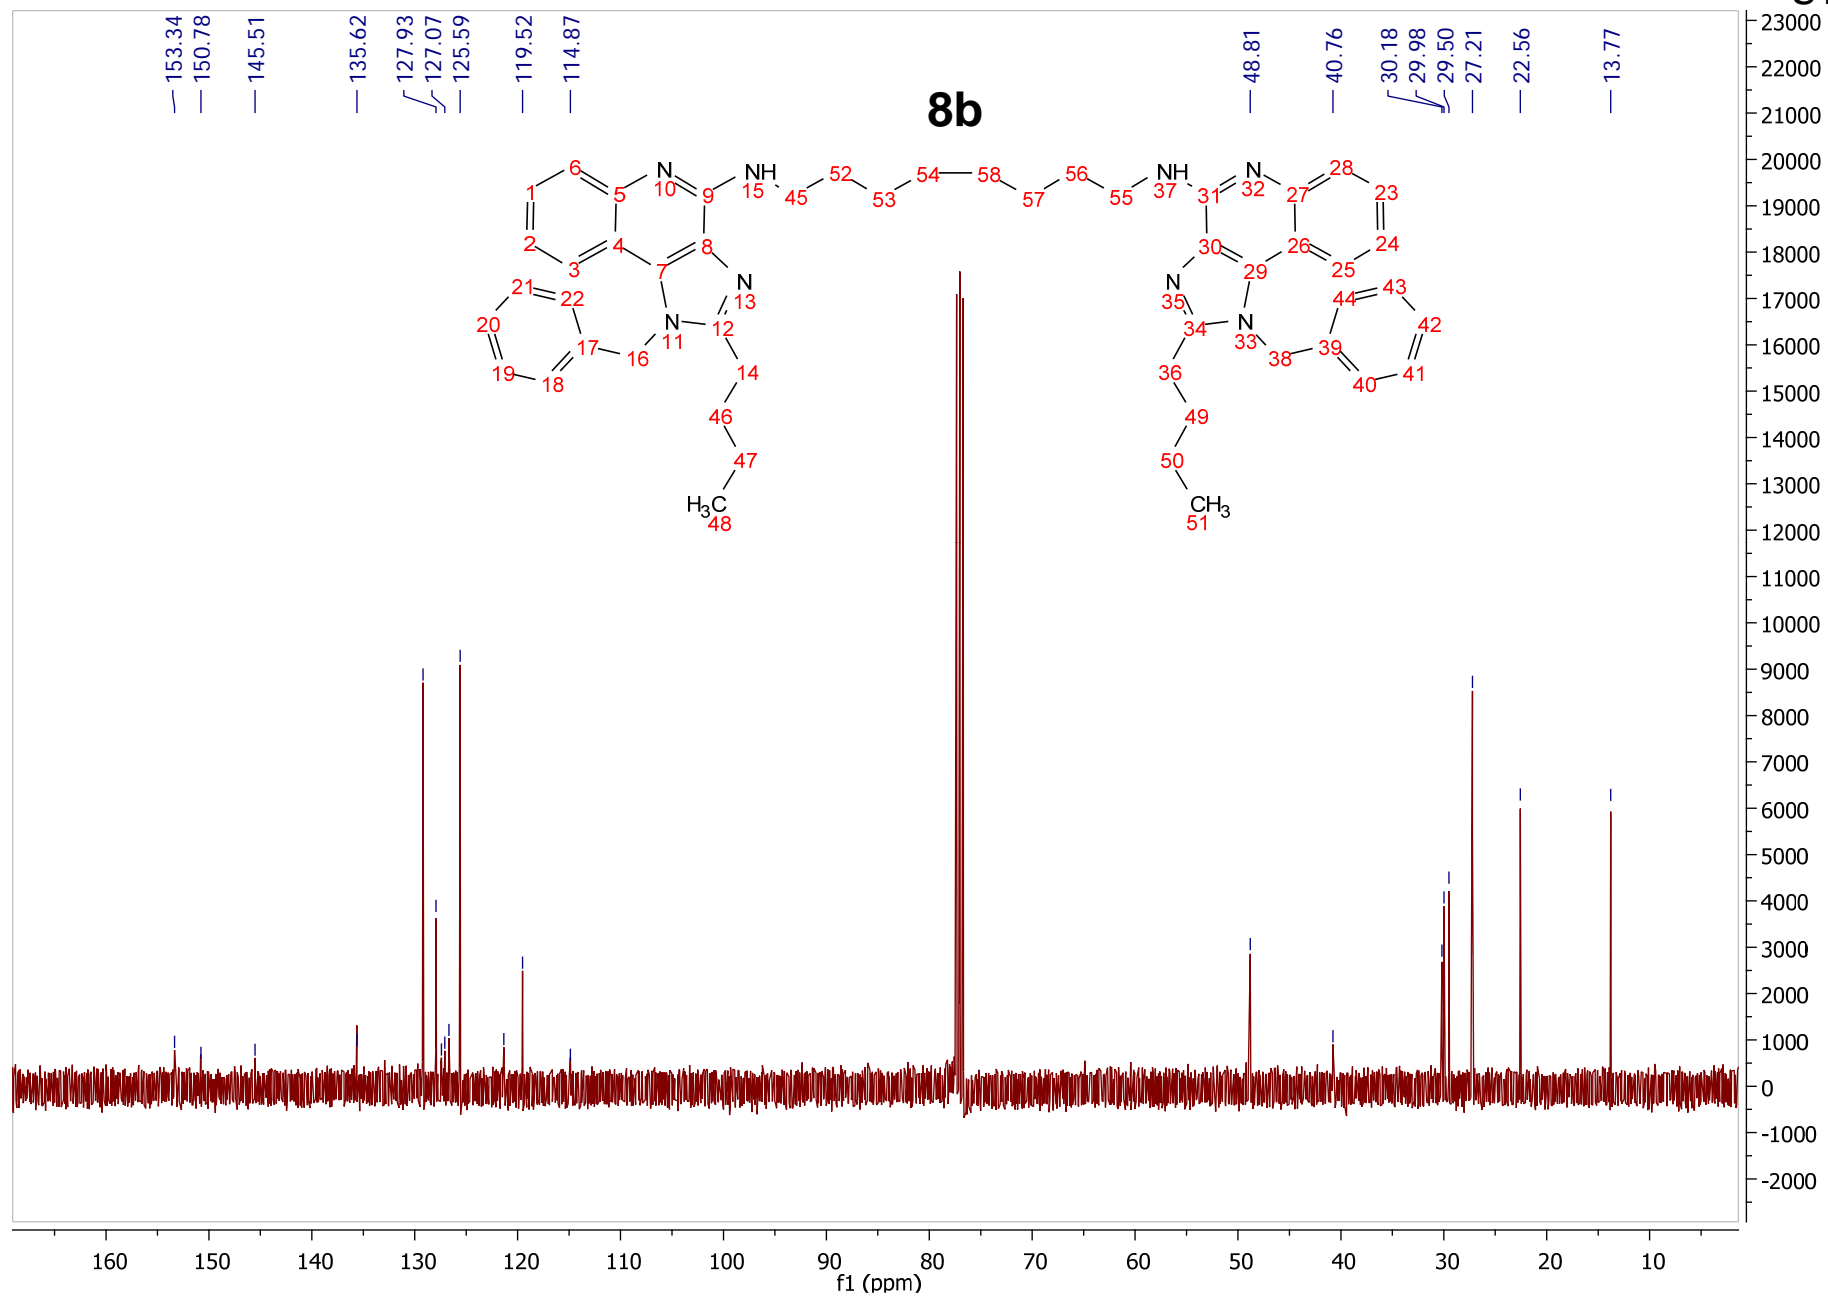

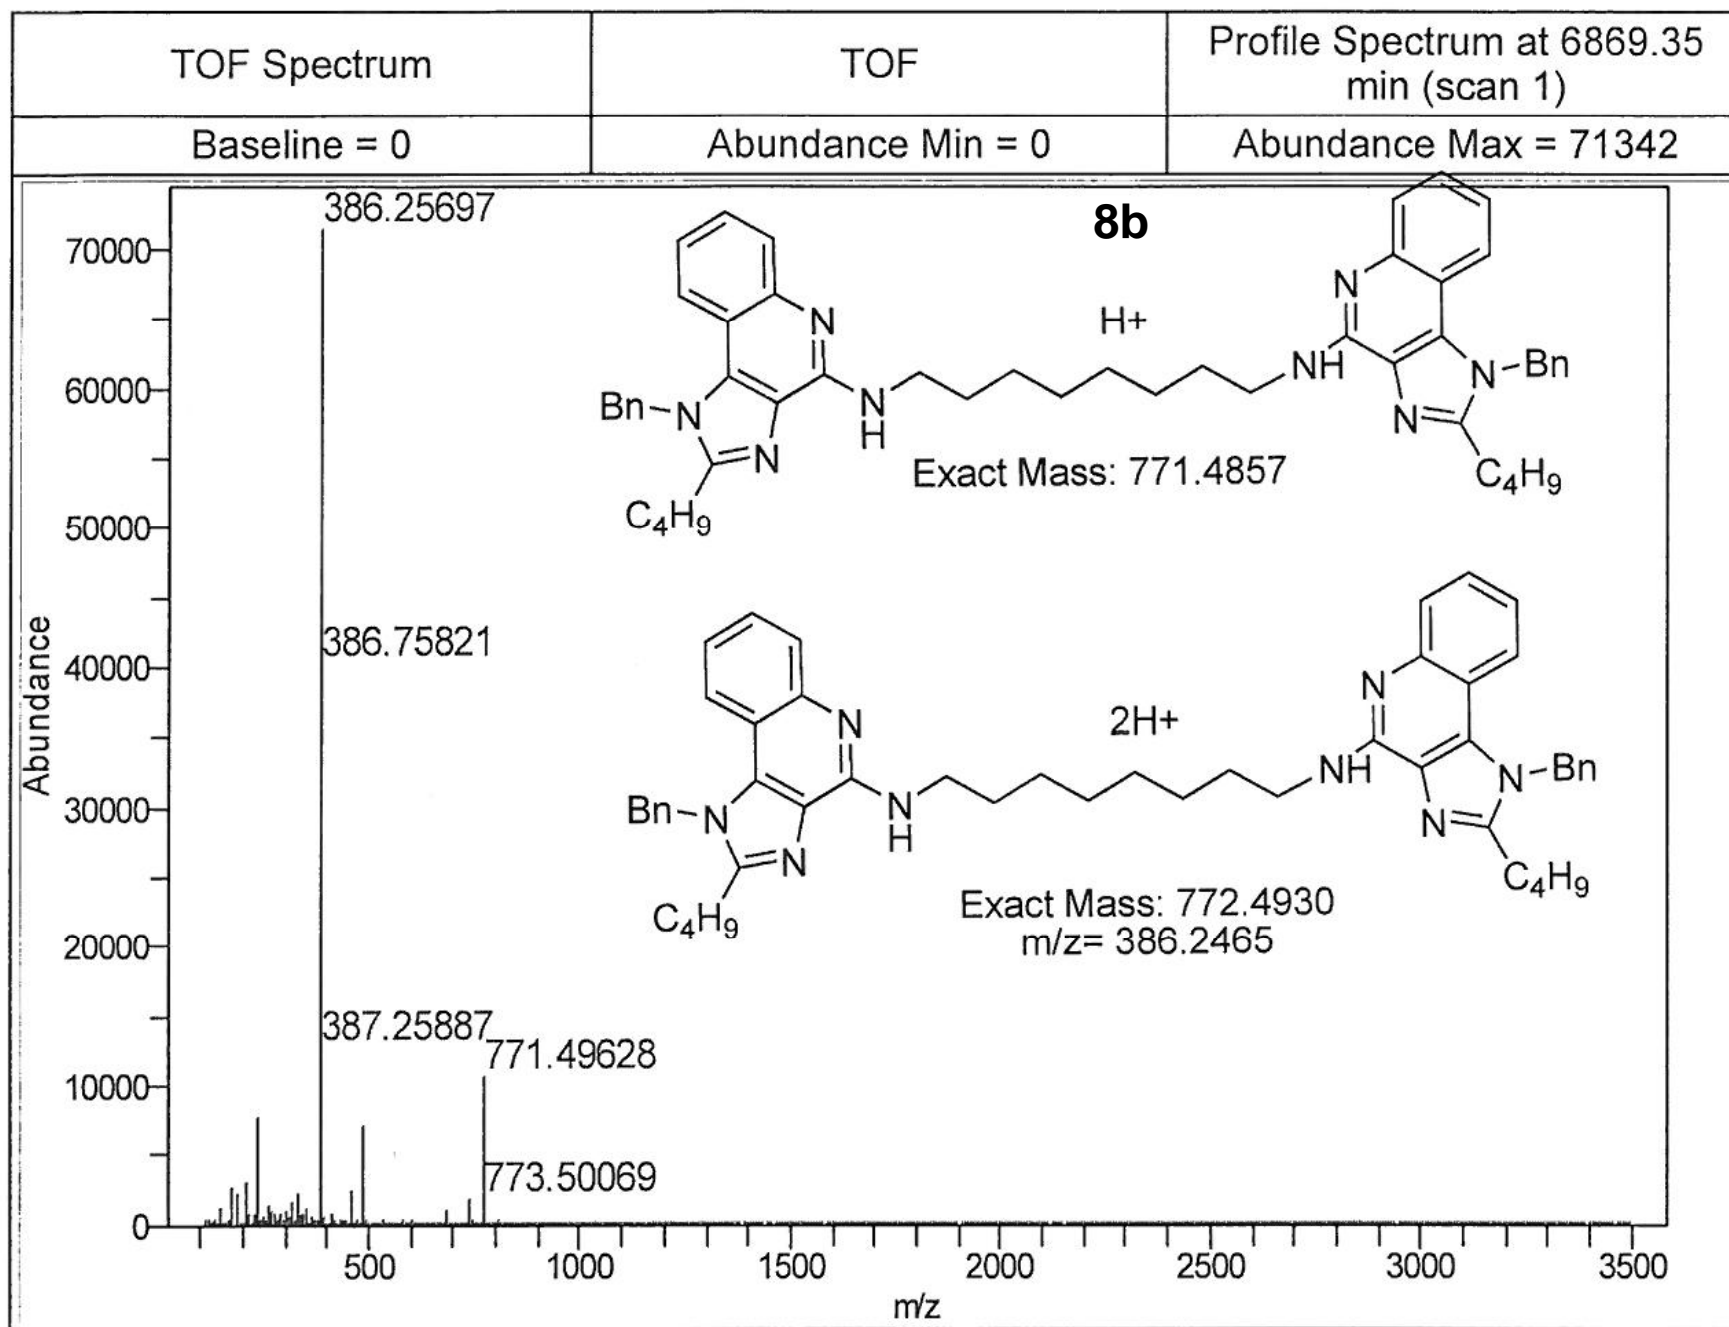

# <sup>1</sup>H Spectrum

S20

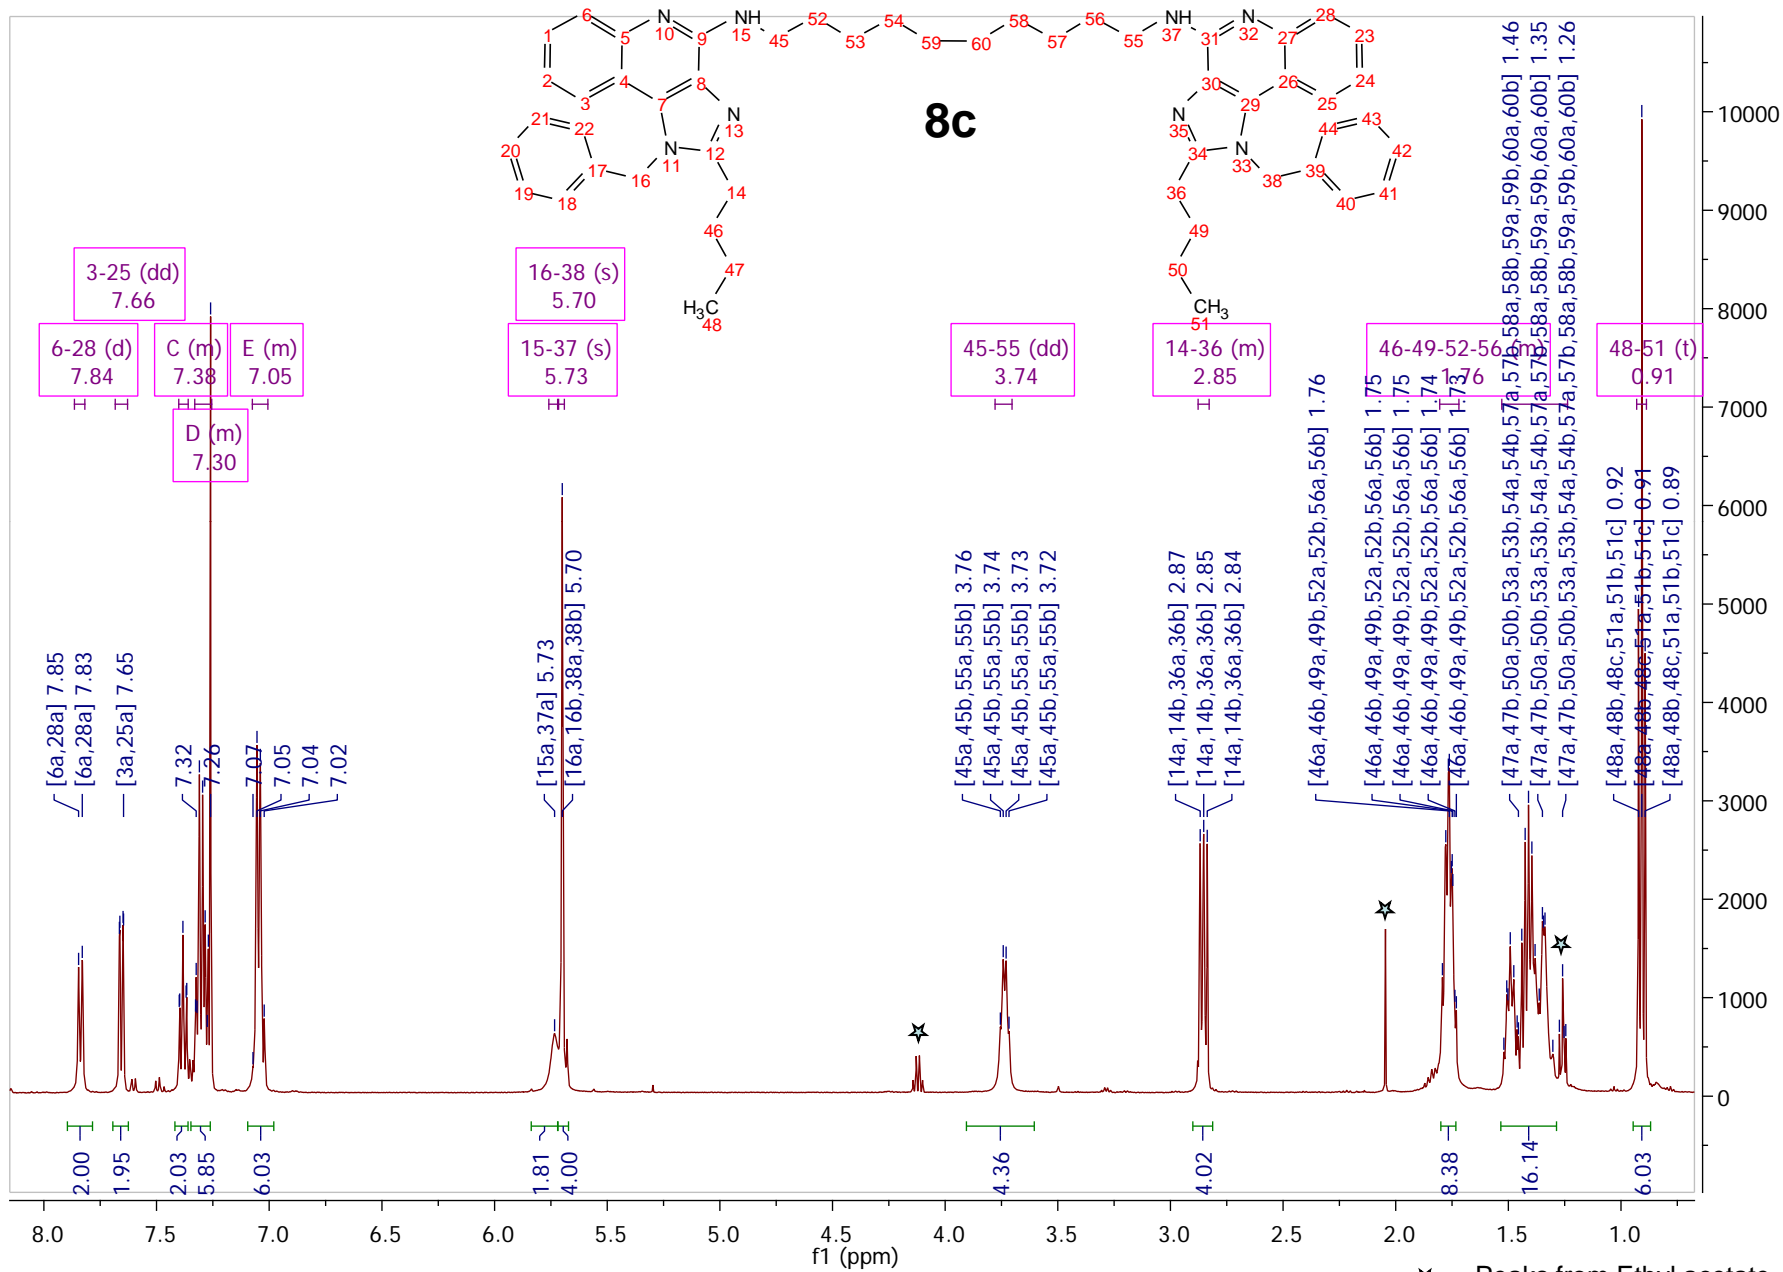

☆ = Peaks from Ethyl acetate

# <sup>13</sup>C Spectrum

S21

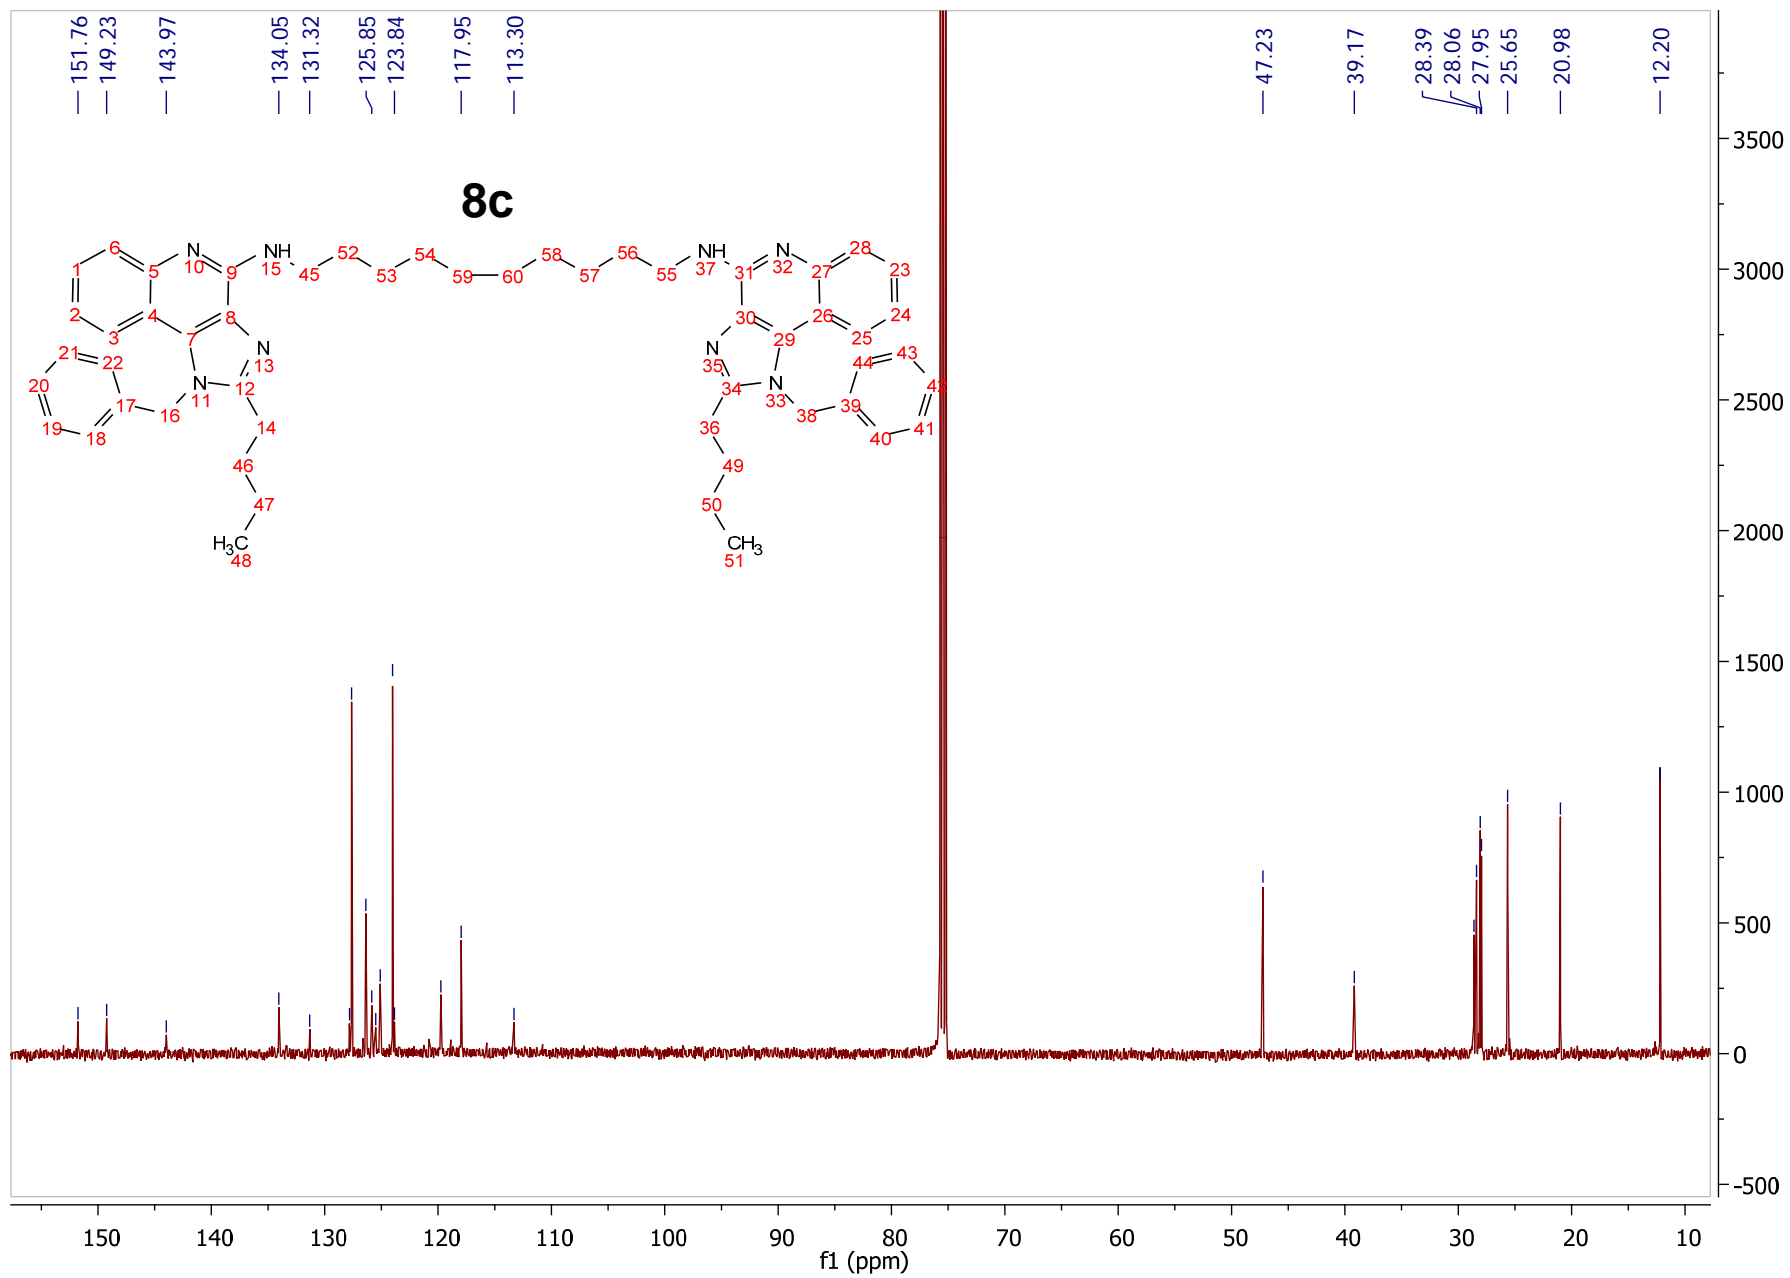

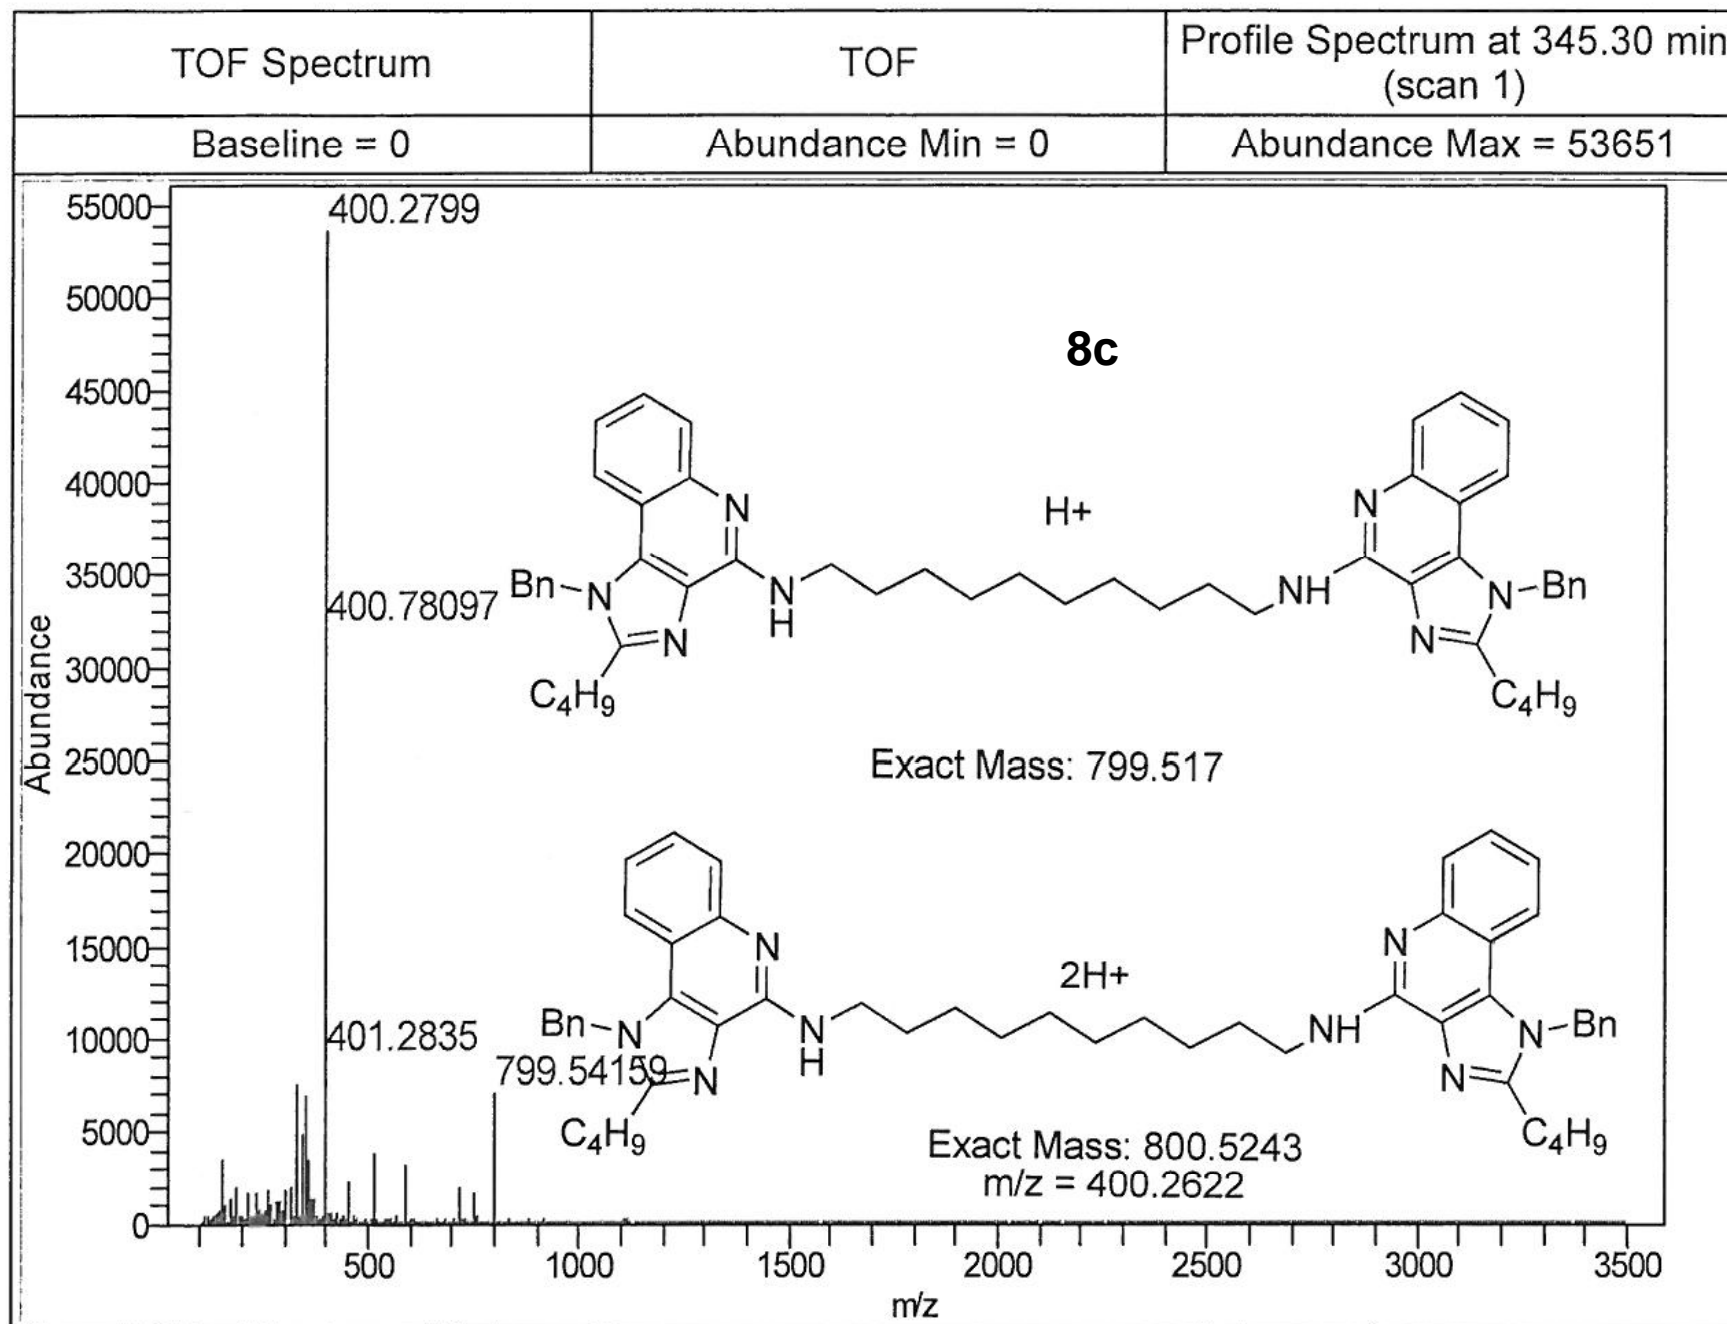

# <sup>1</sup>H Spectrum

S23

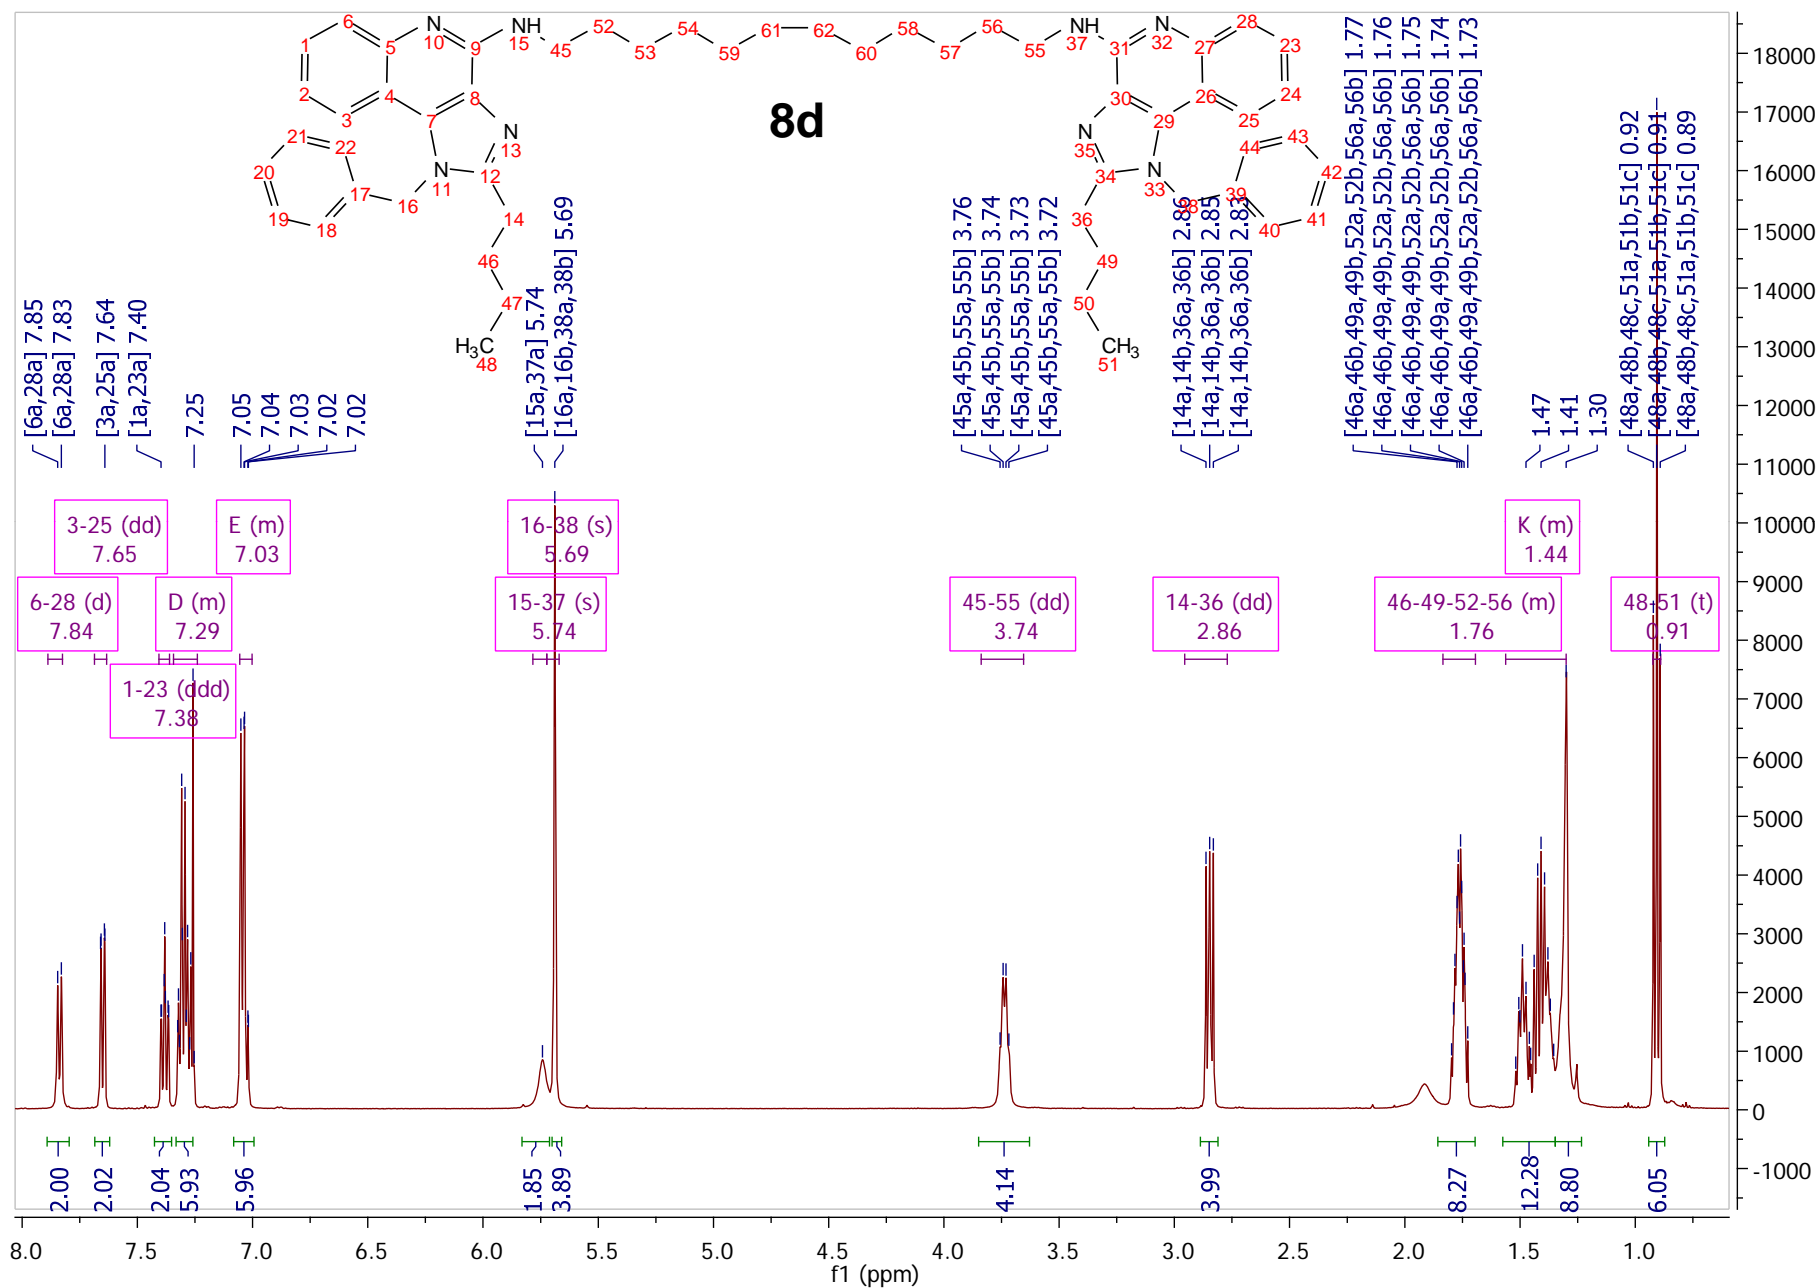

# <sup>13</sup>C Spectrum

S24

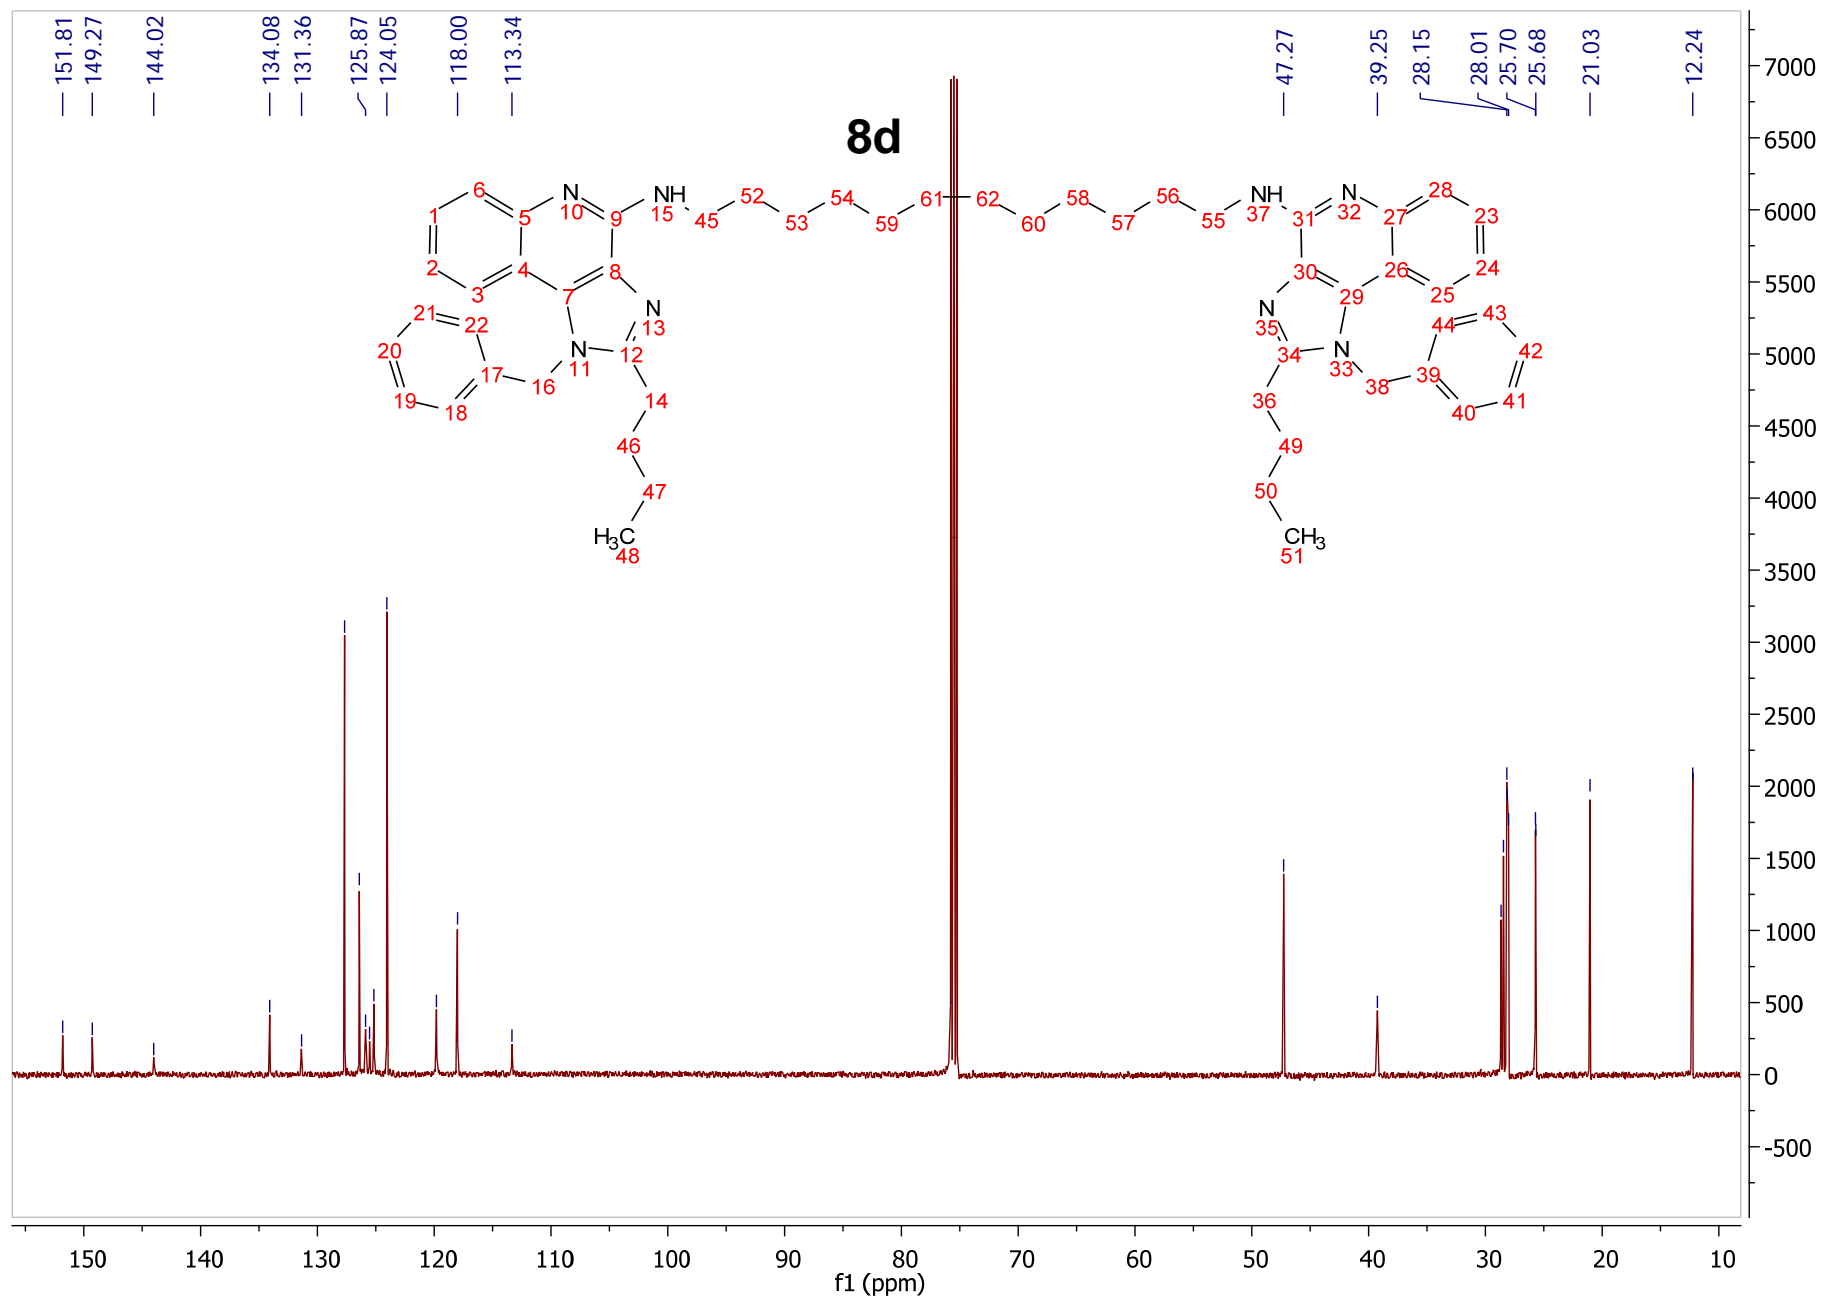



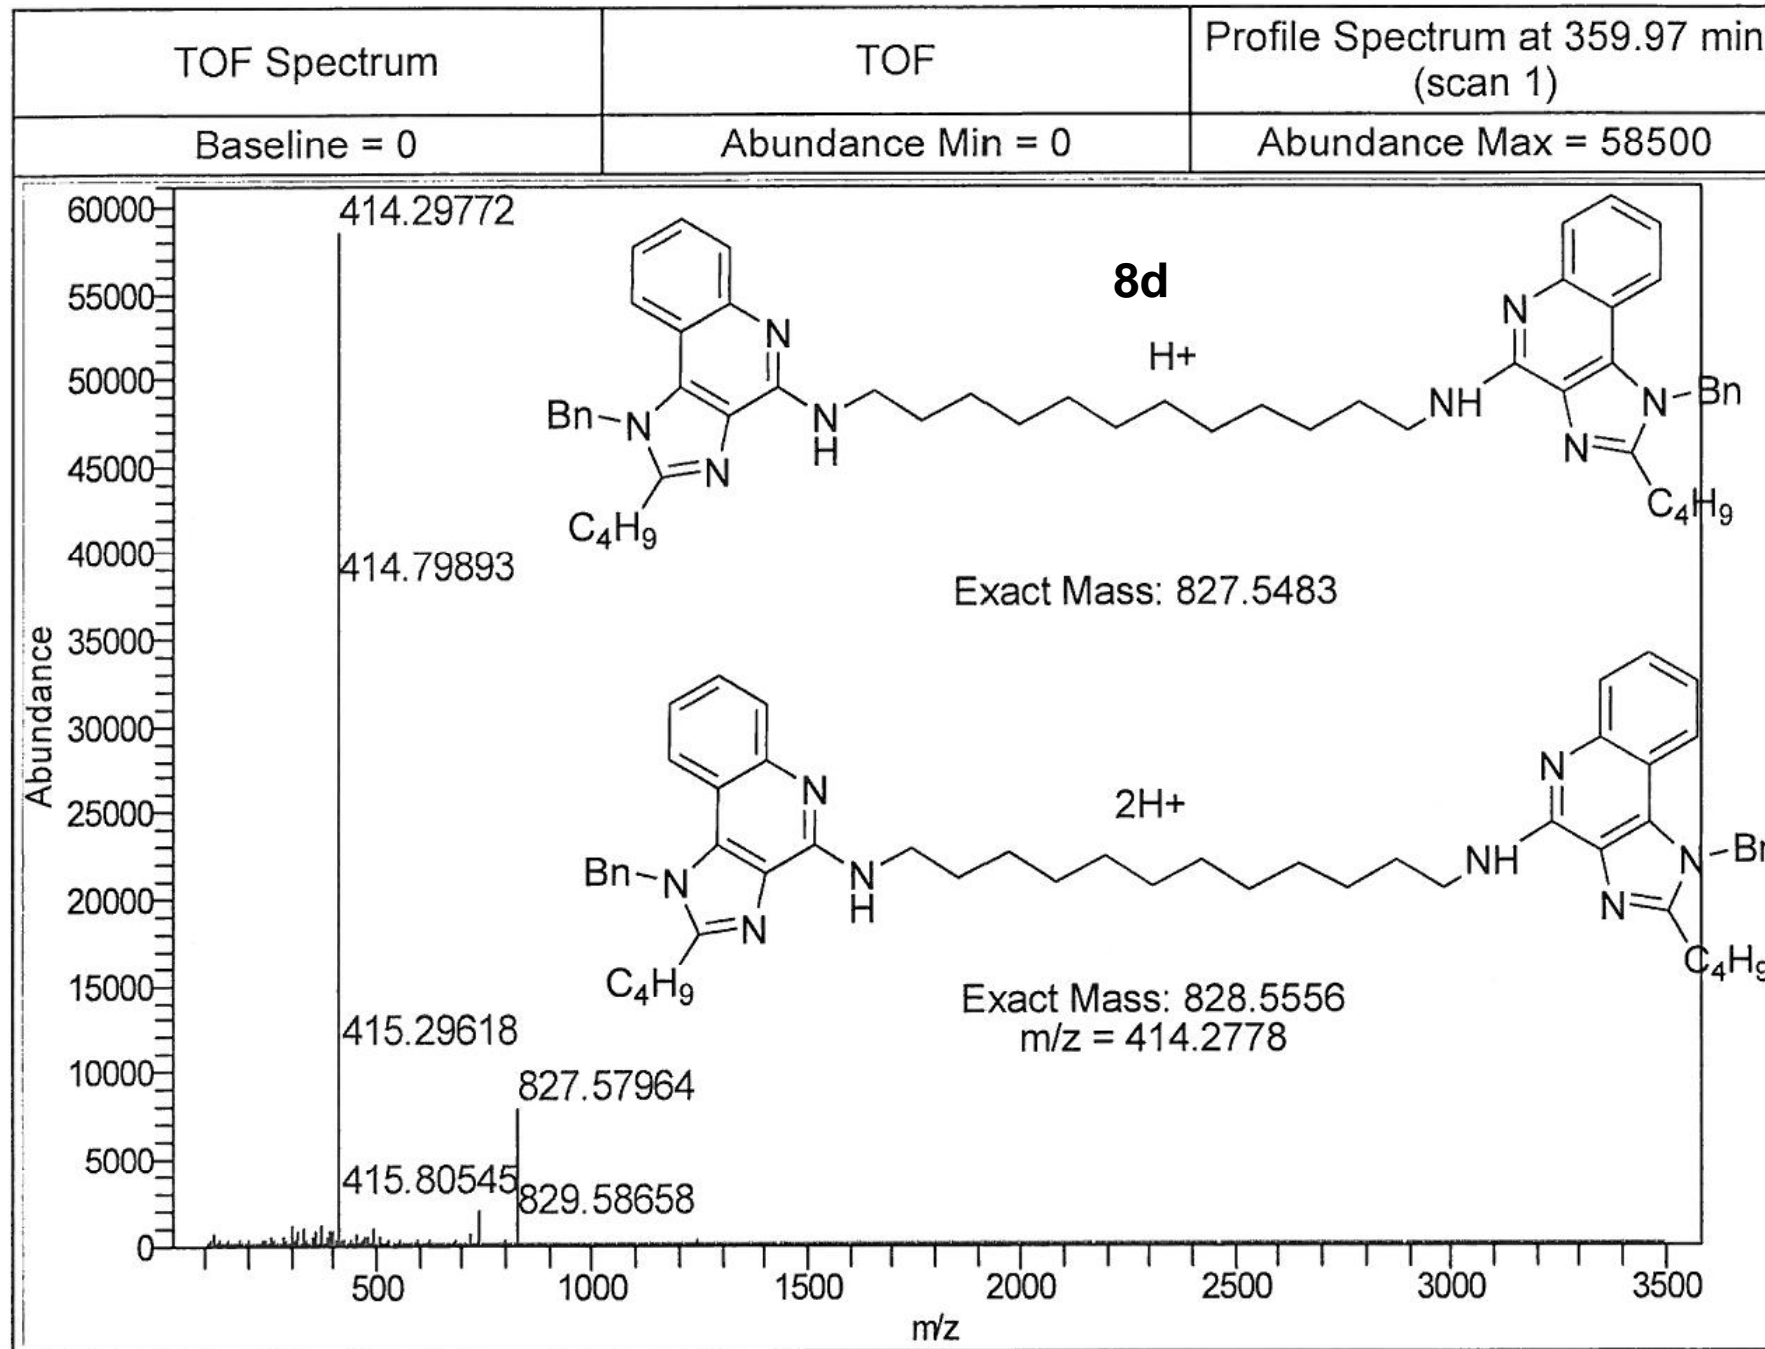

# <sup>1</sup>H Spectrum

S26

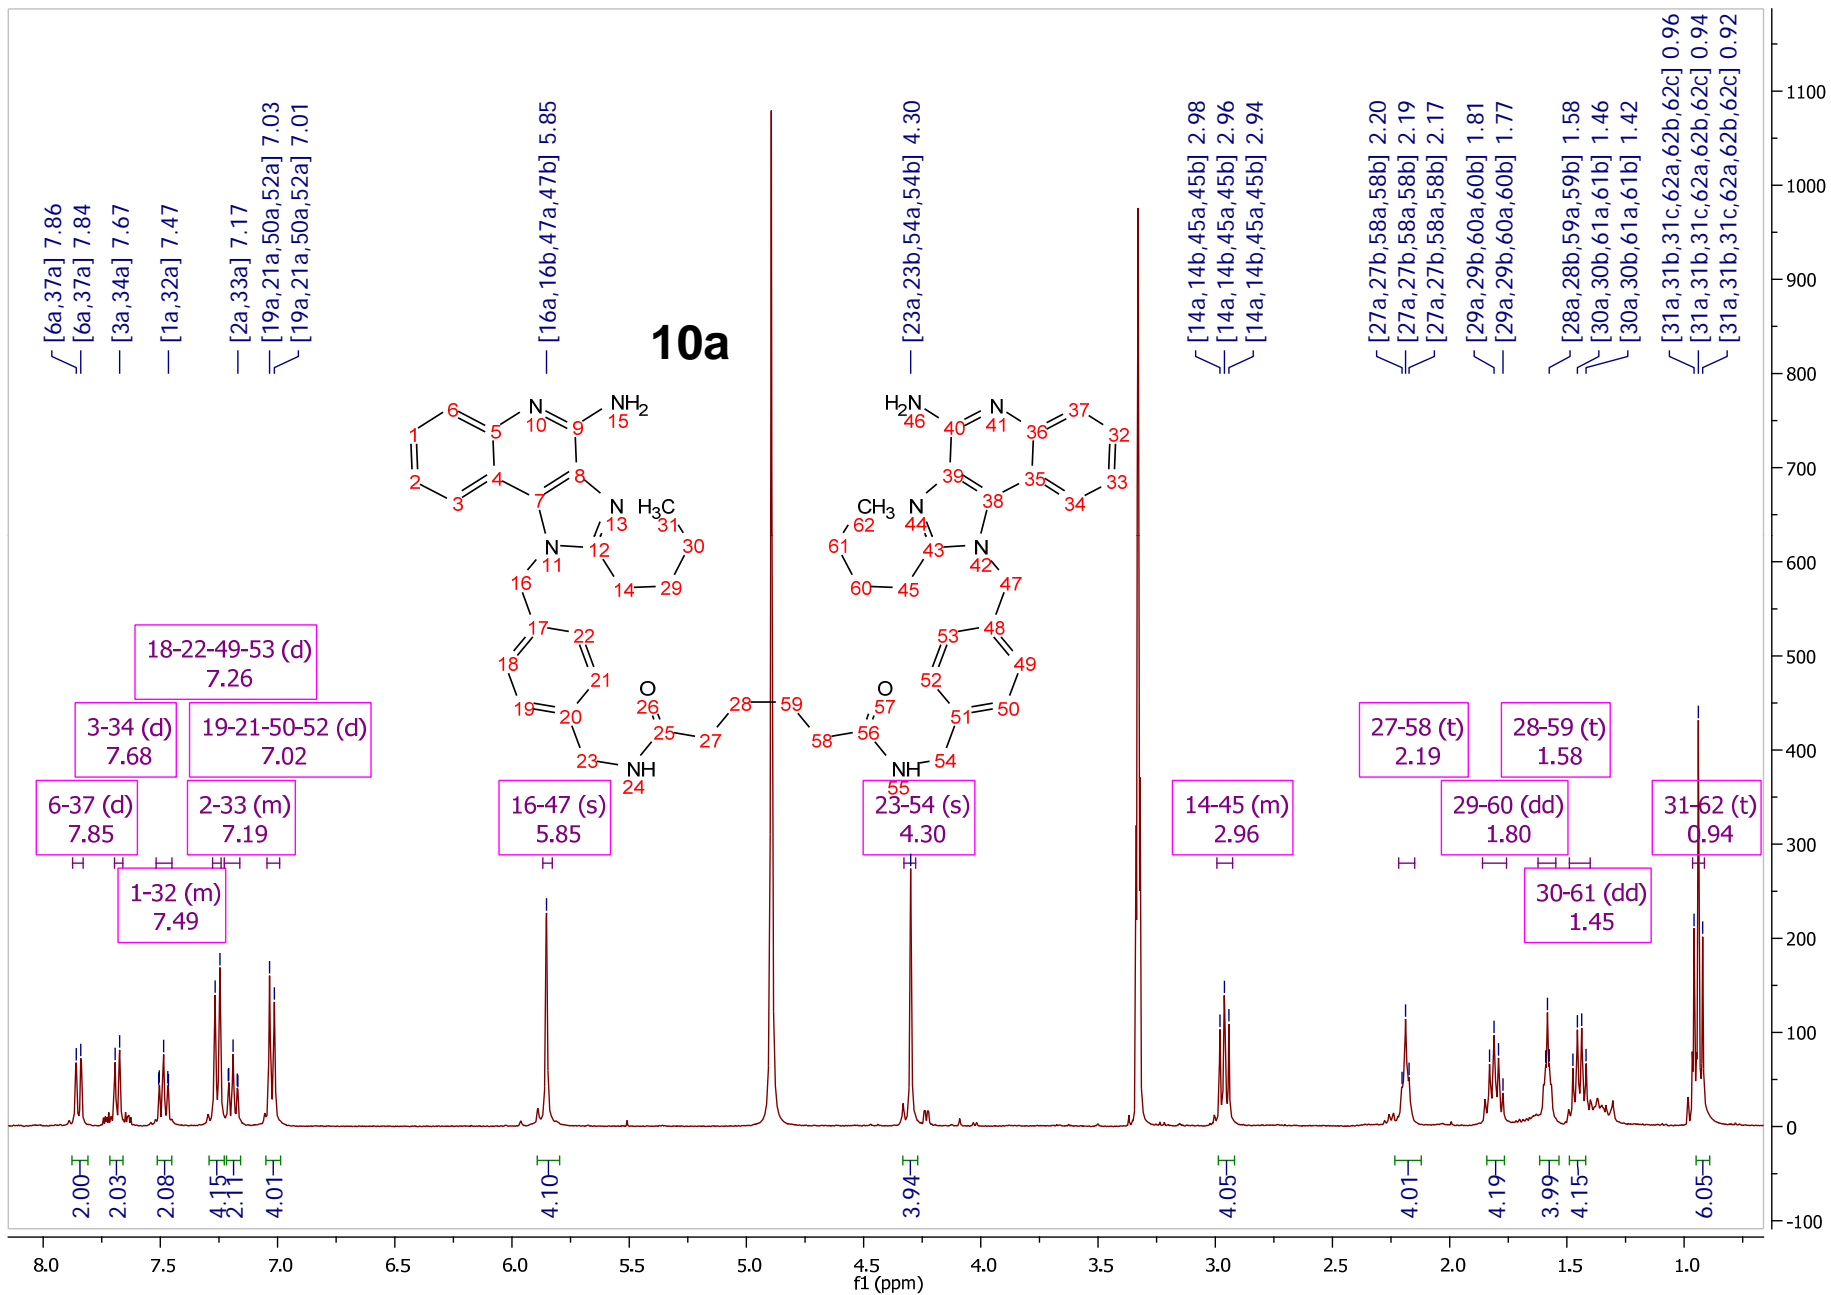

# <sup>13</sup>C Spectrum

S27

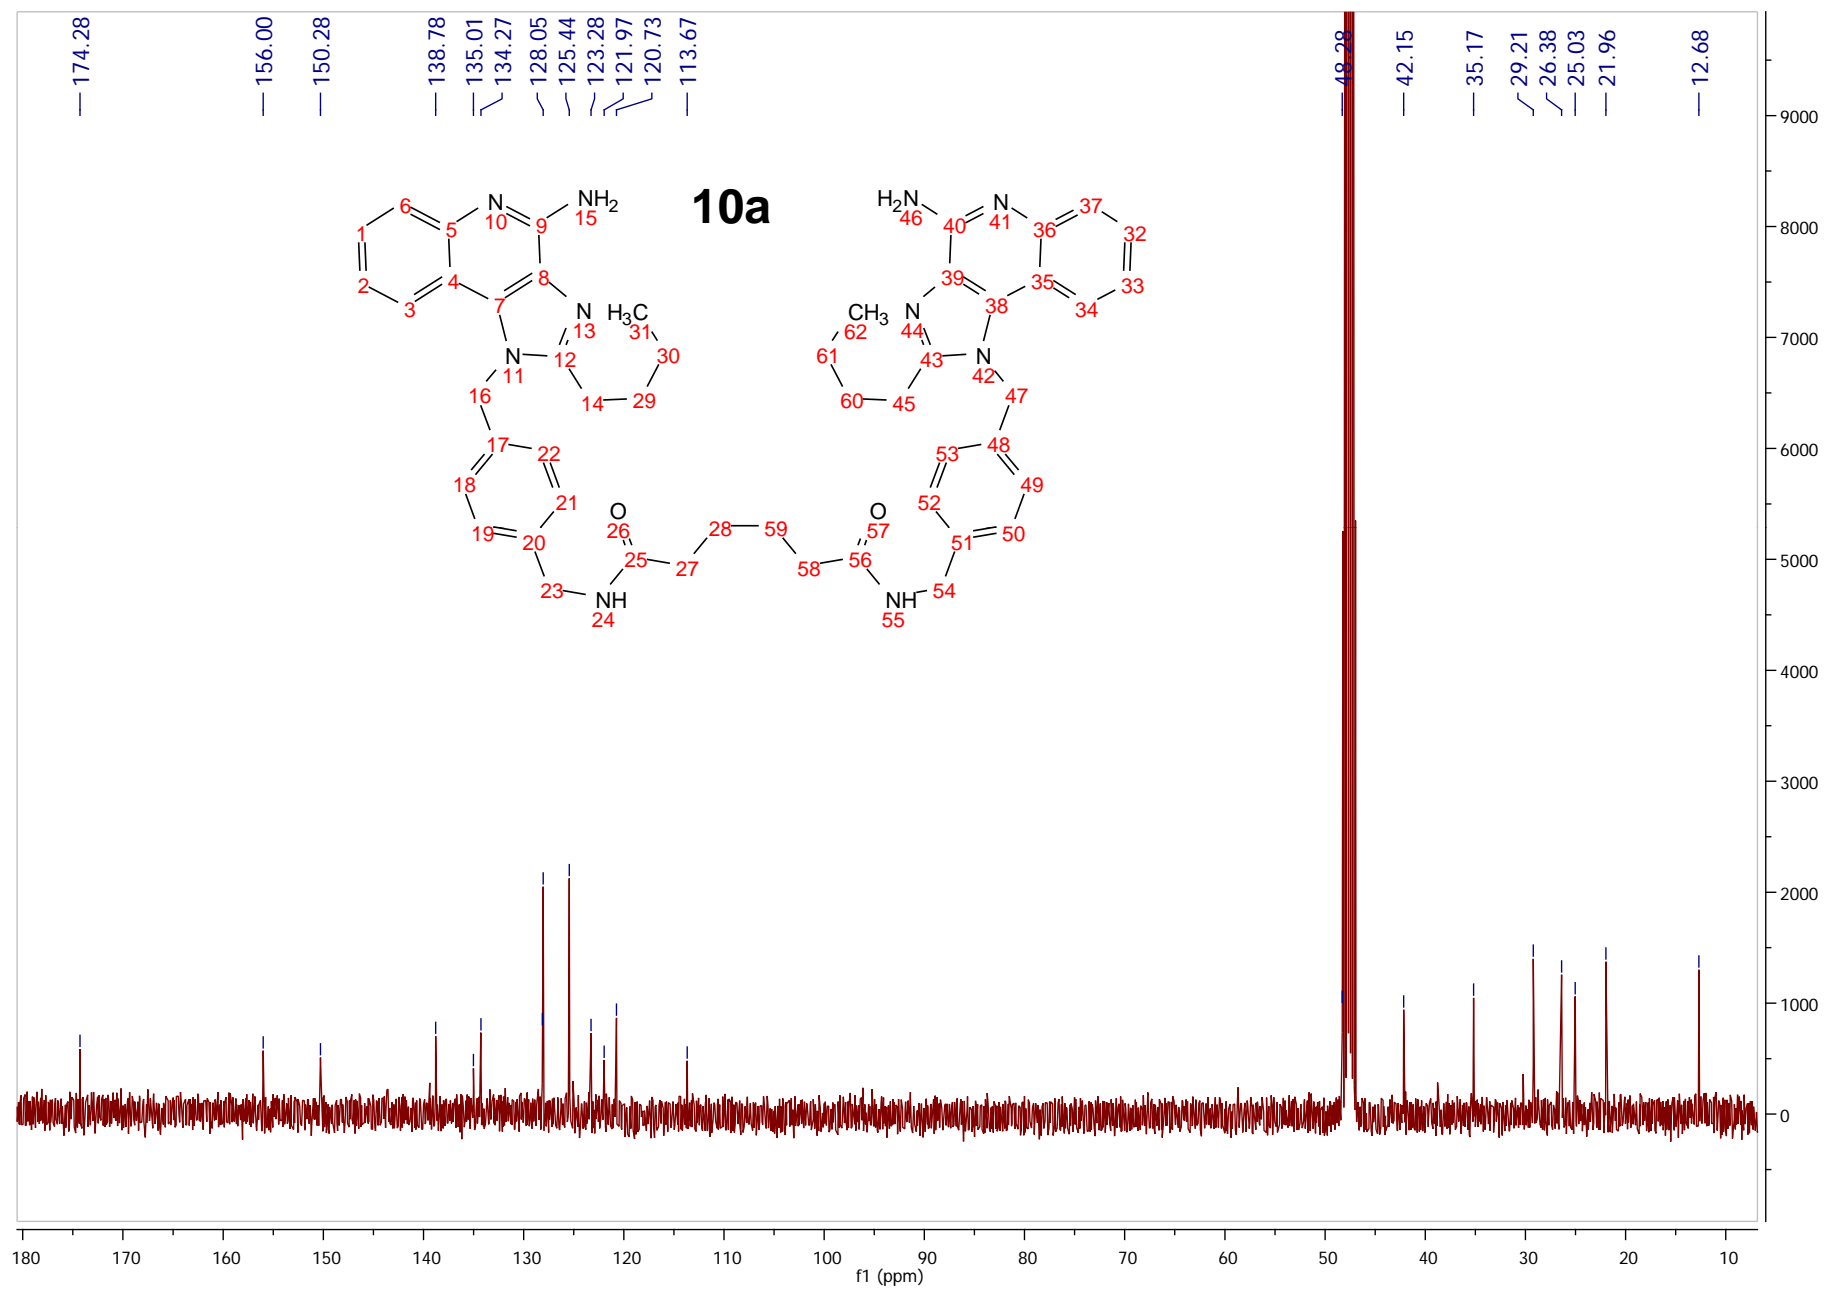

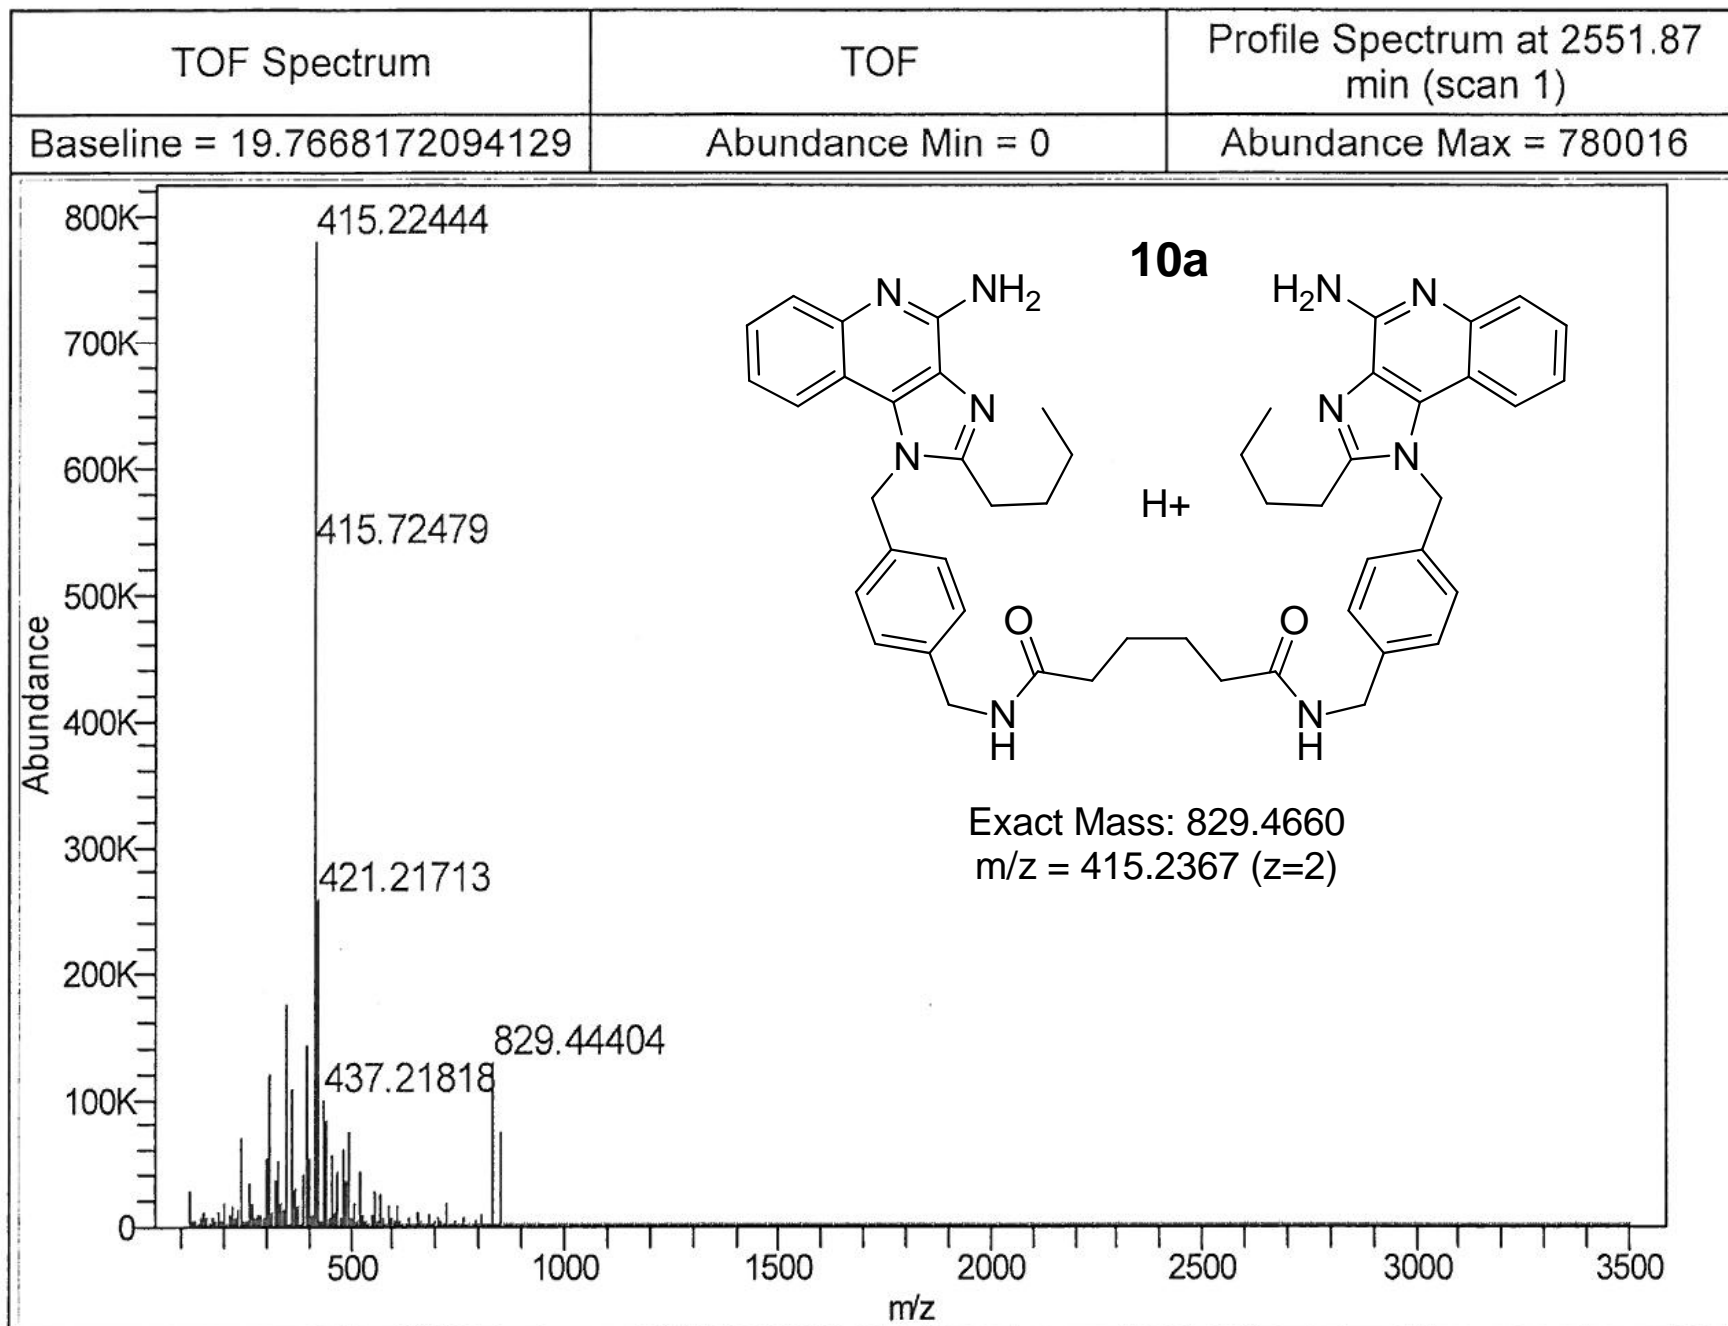

# <sup>1</sup>H Spectrum

S29

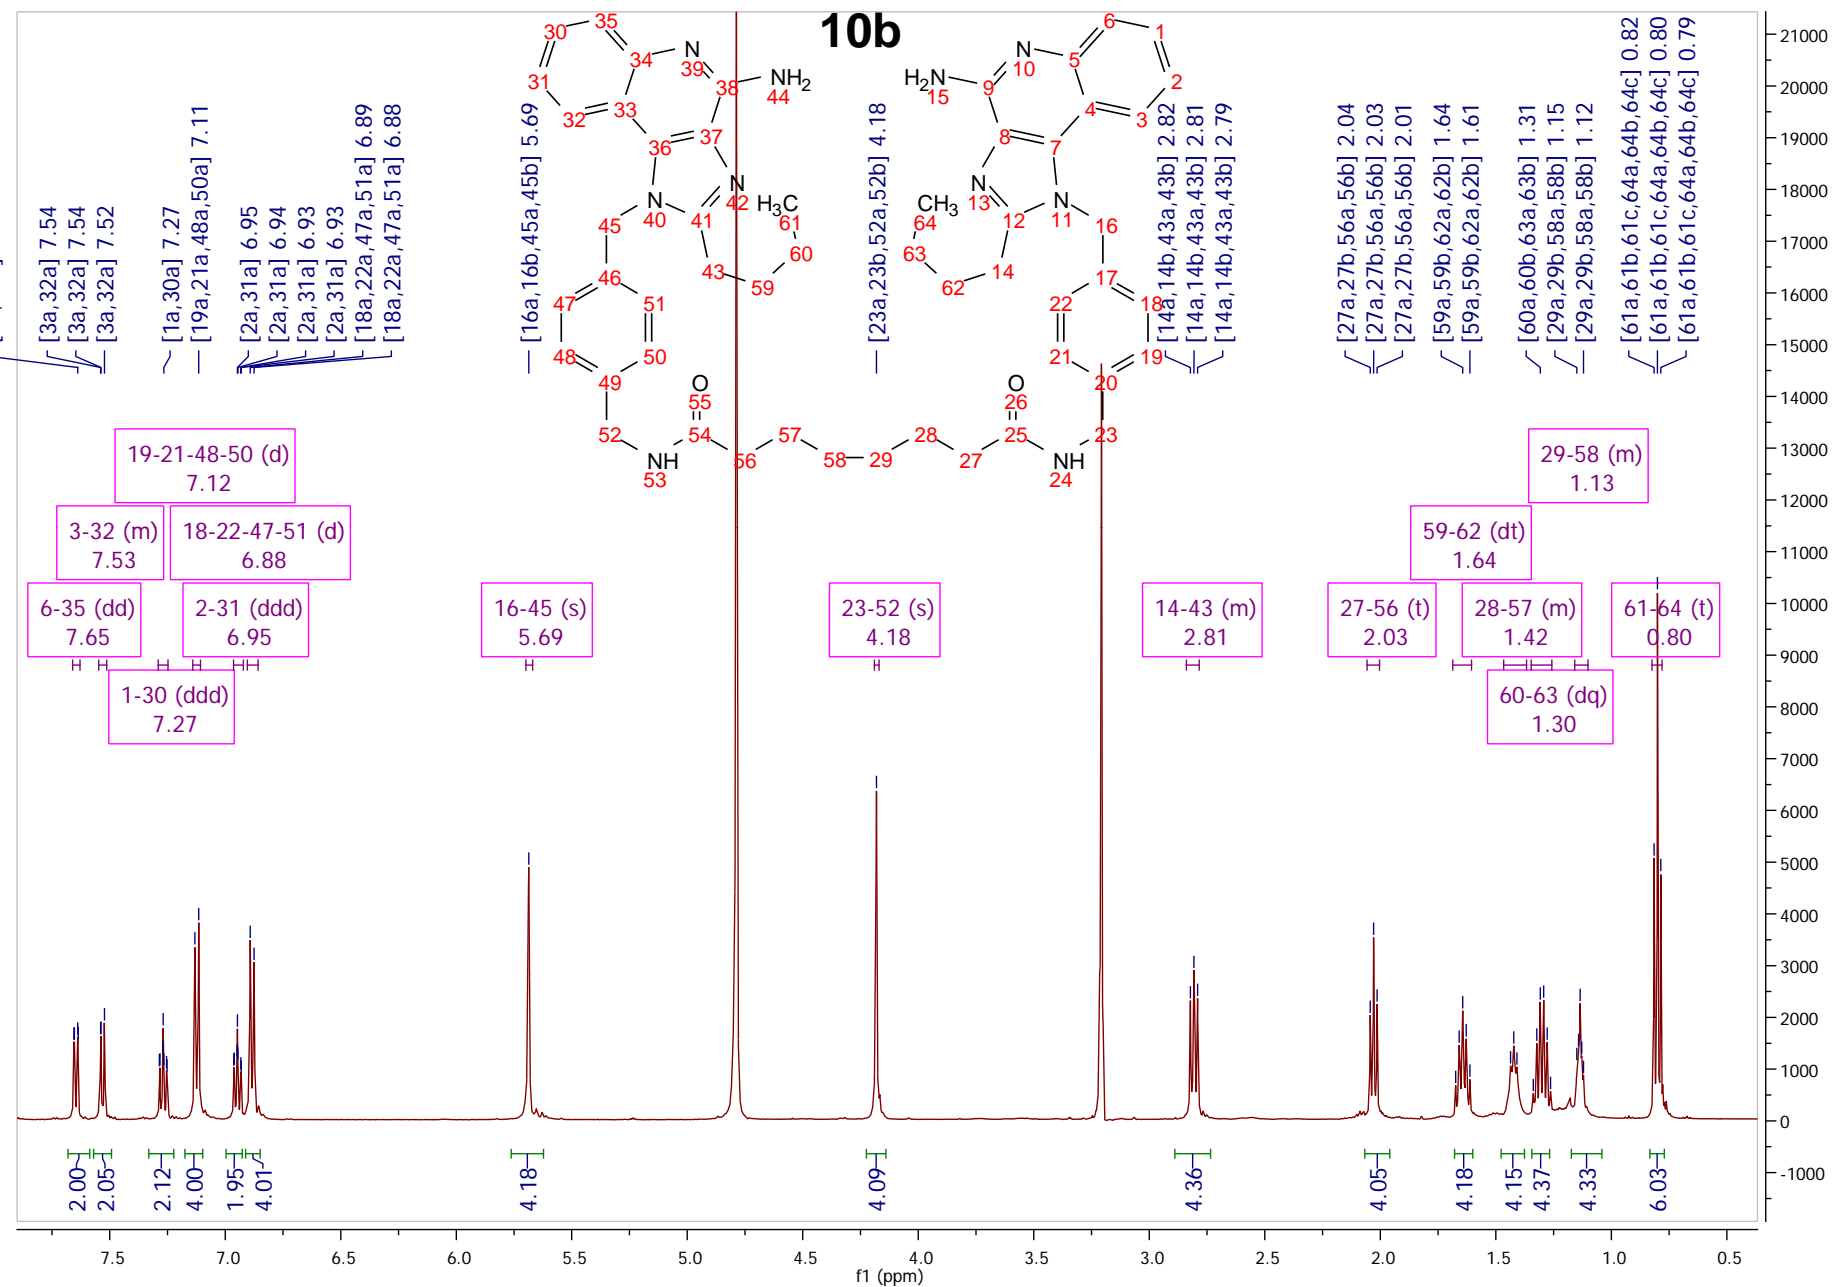

# <sup>13</sup>C Spectrum

S30

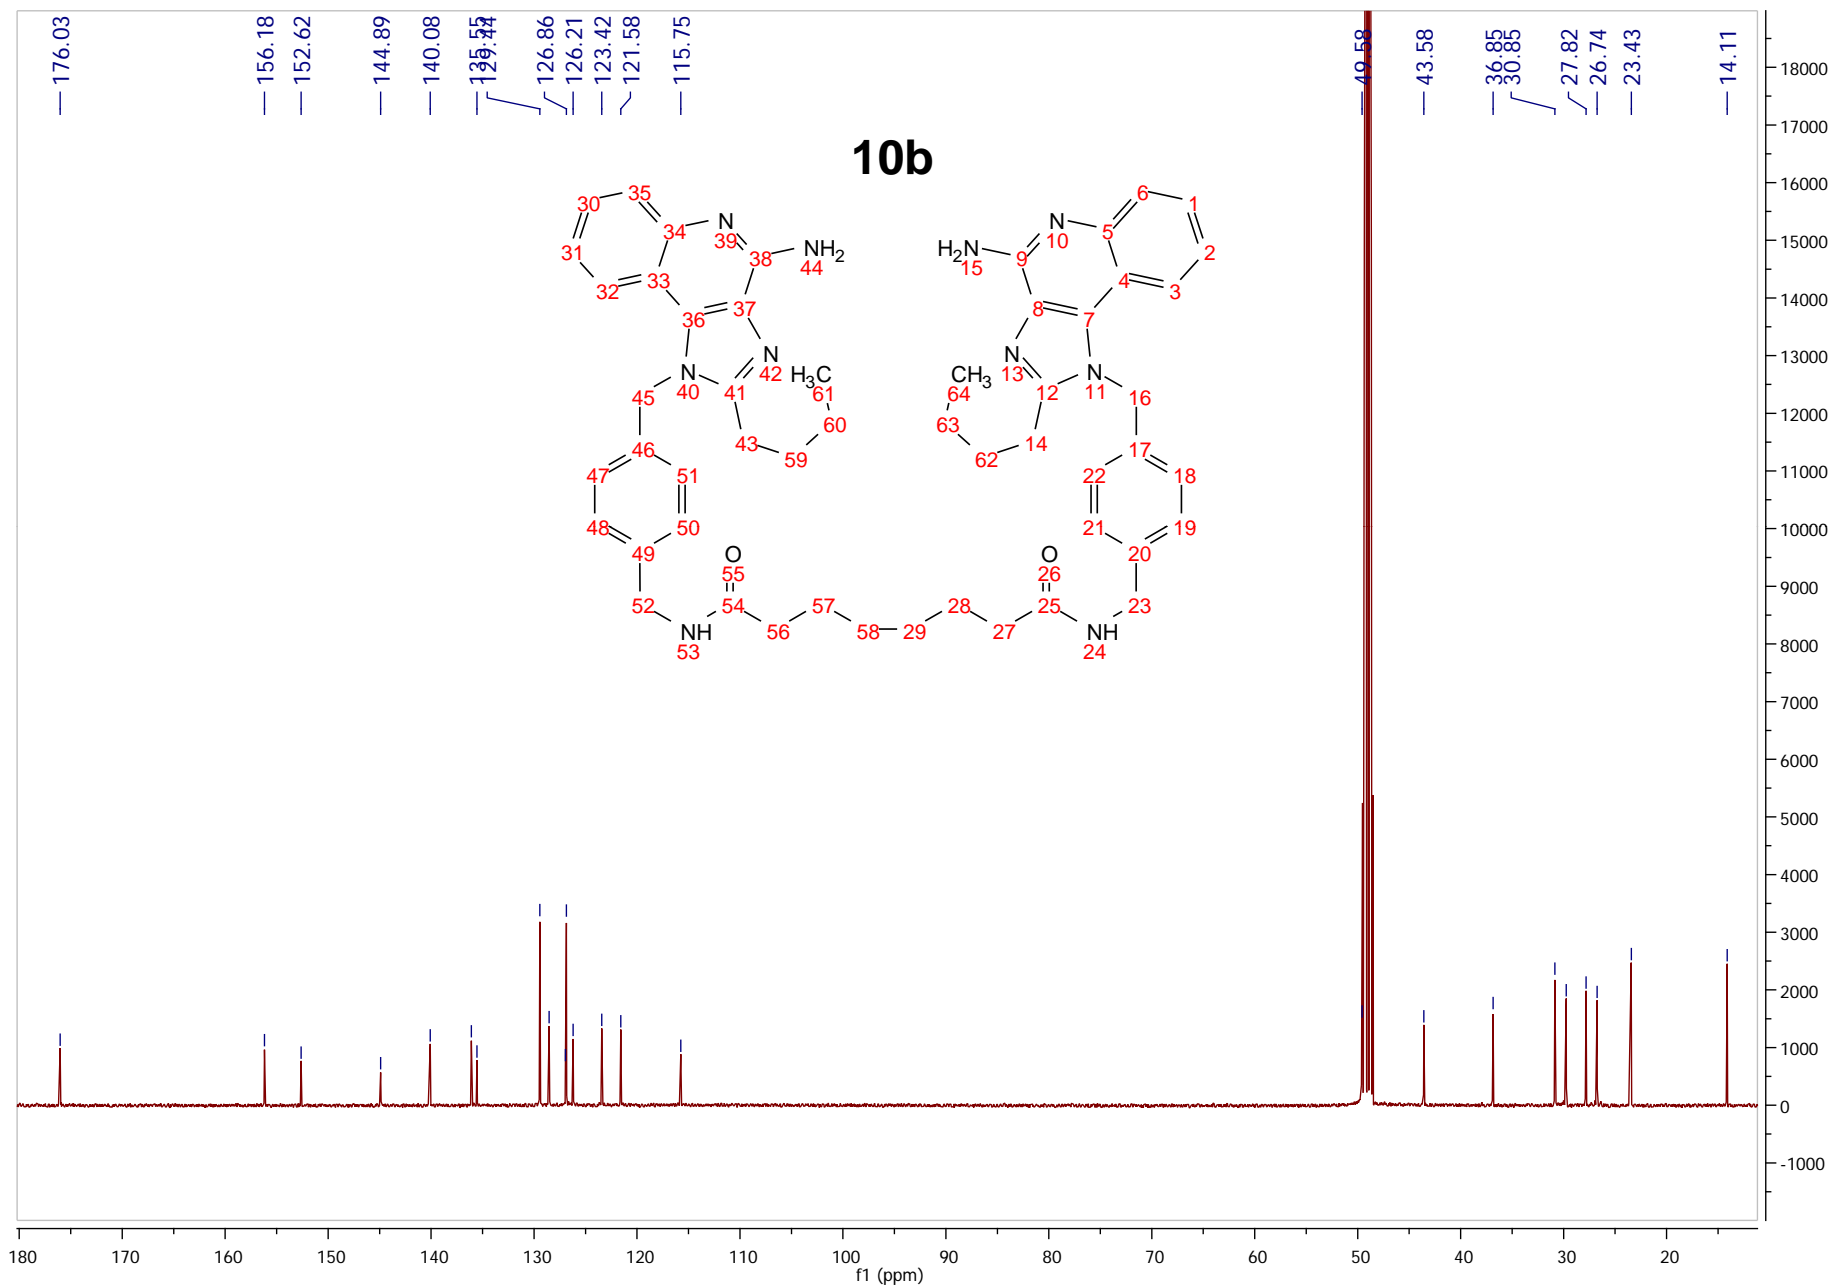

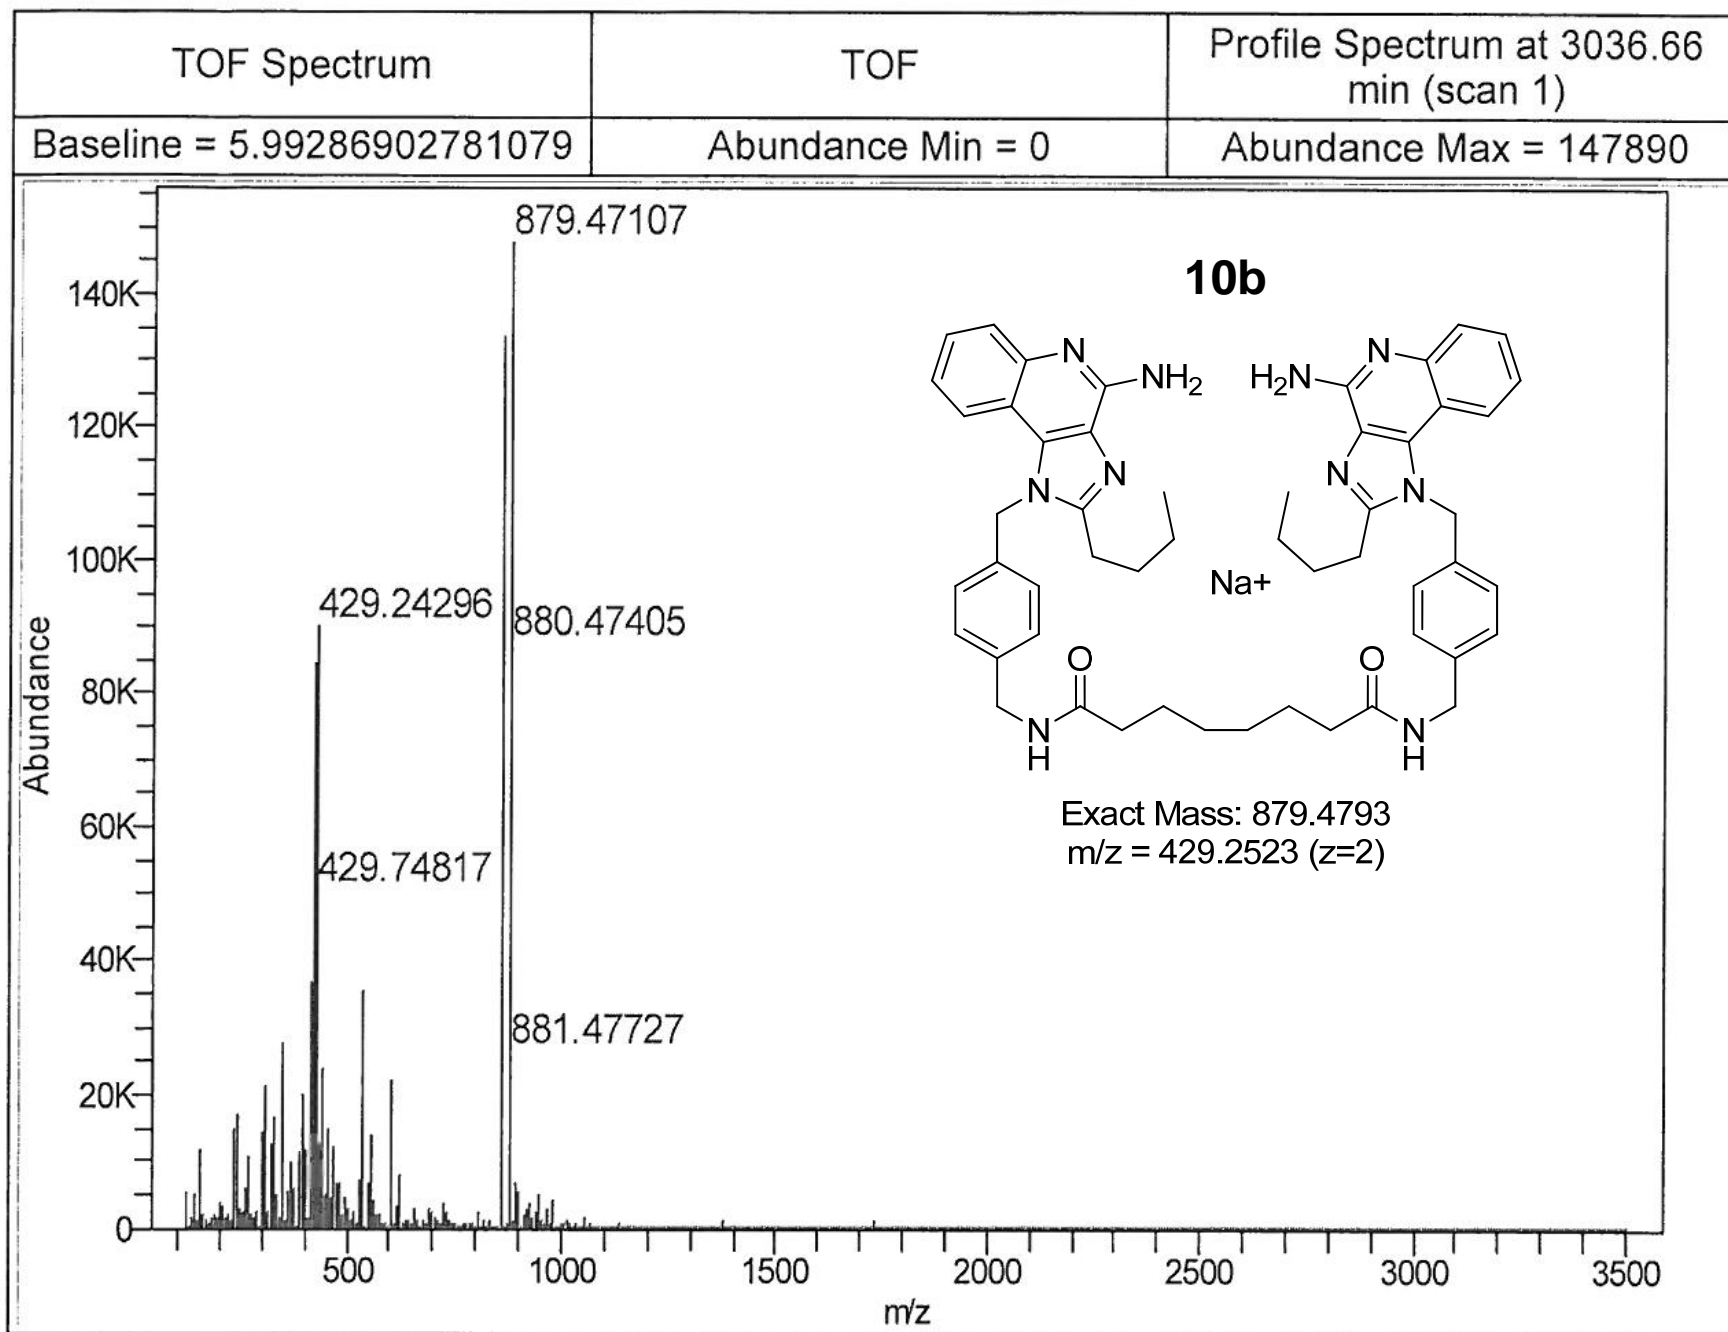

# <sup>1</sup>H Spectrum

S32

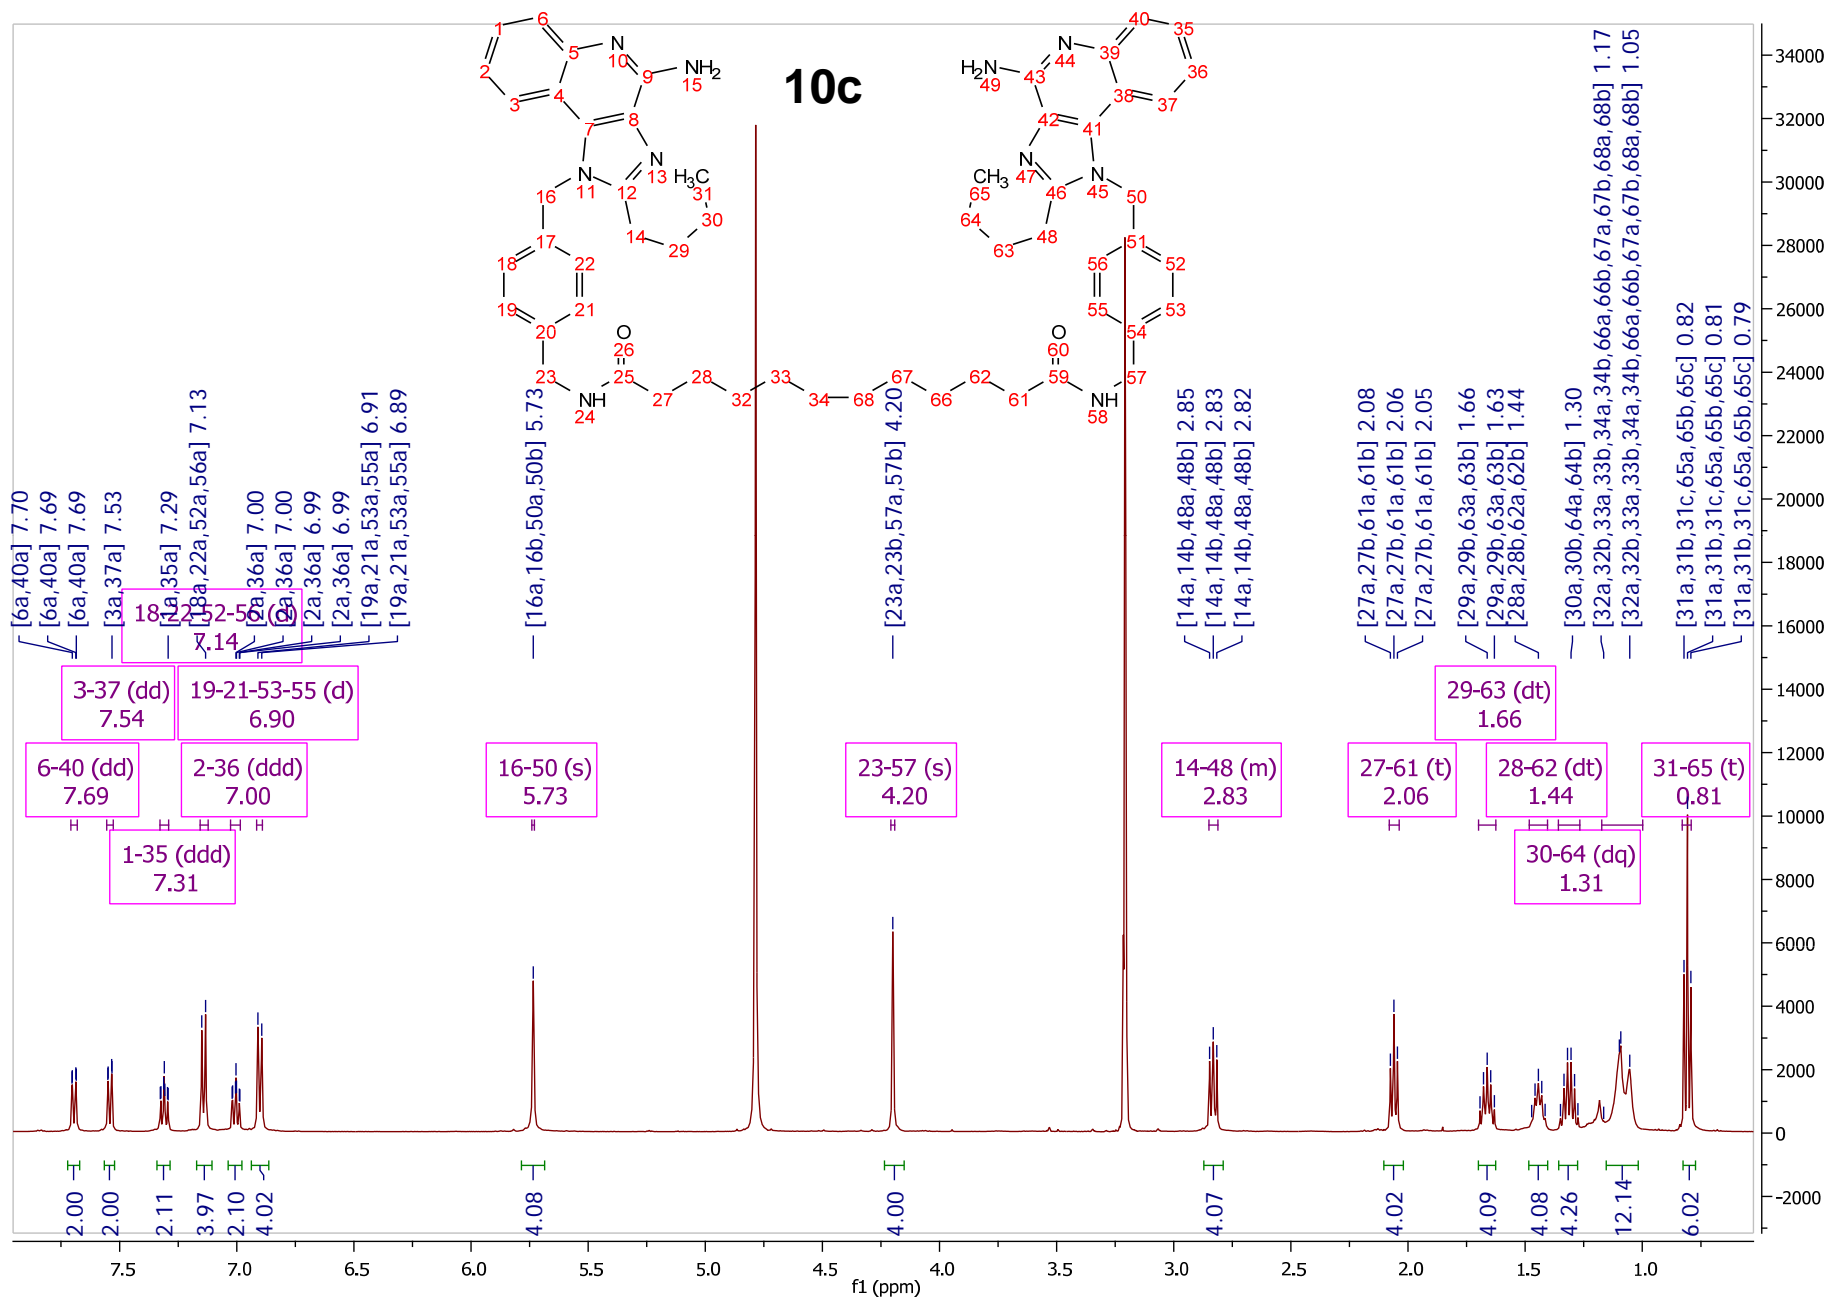



# <sup>13</sup>C Spectrum

S33

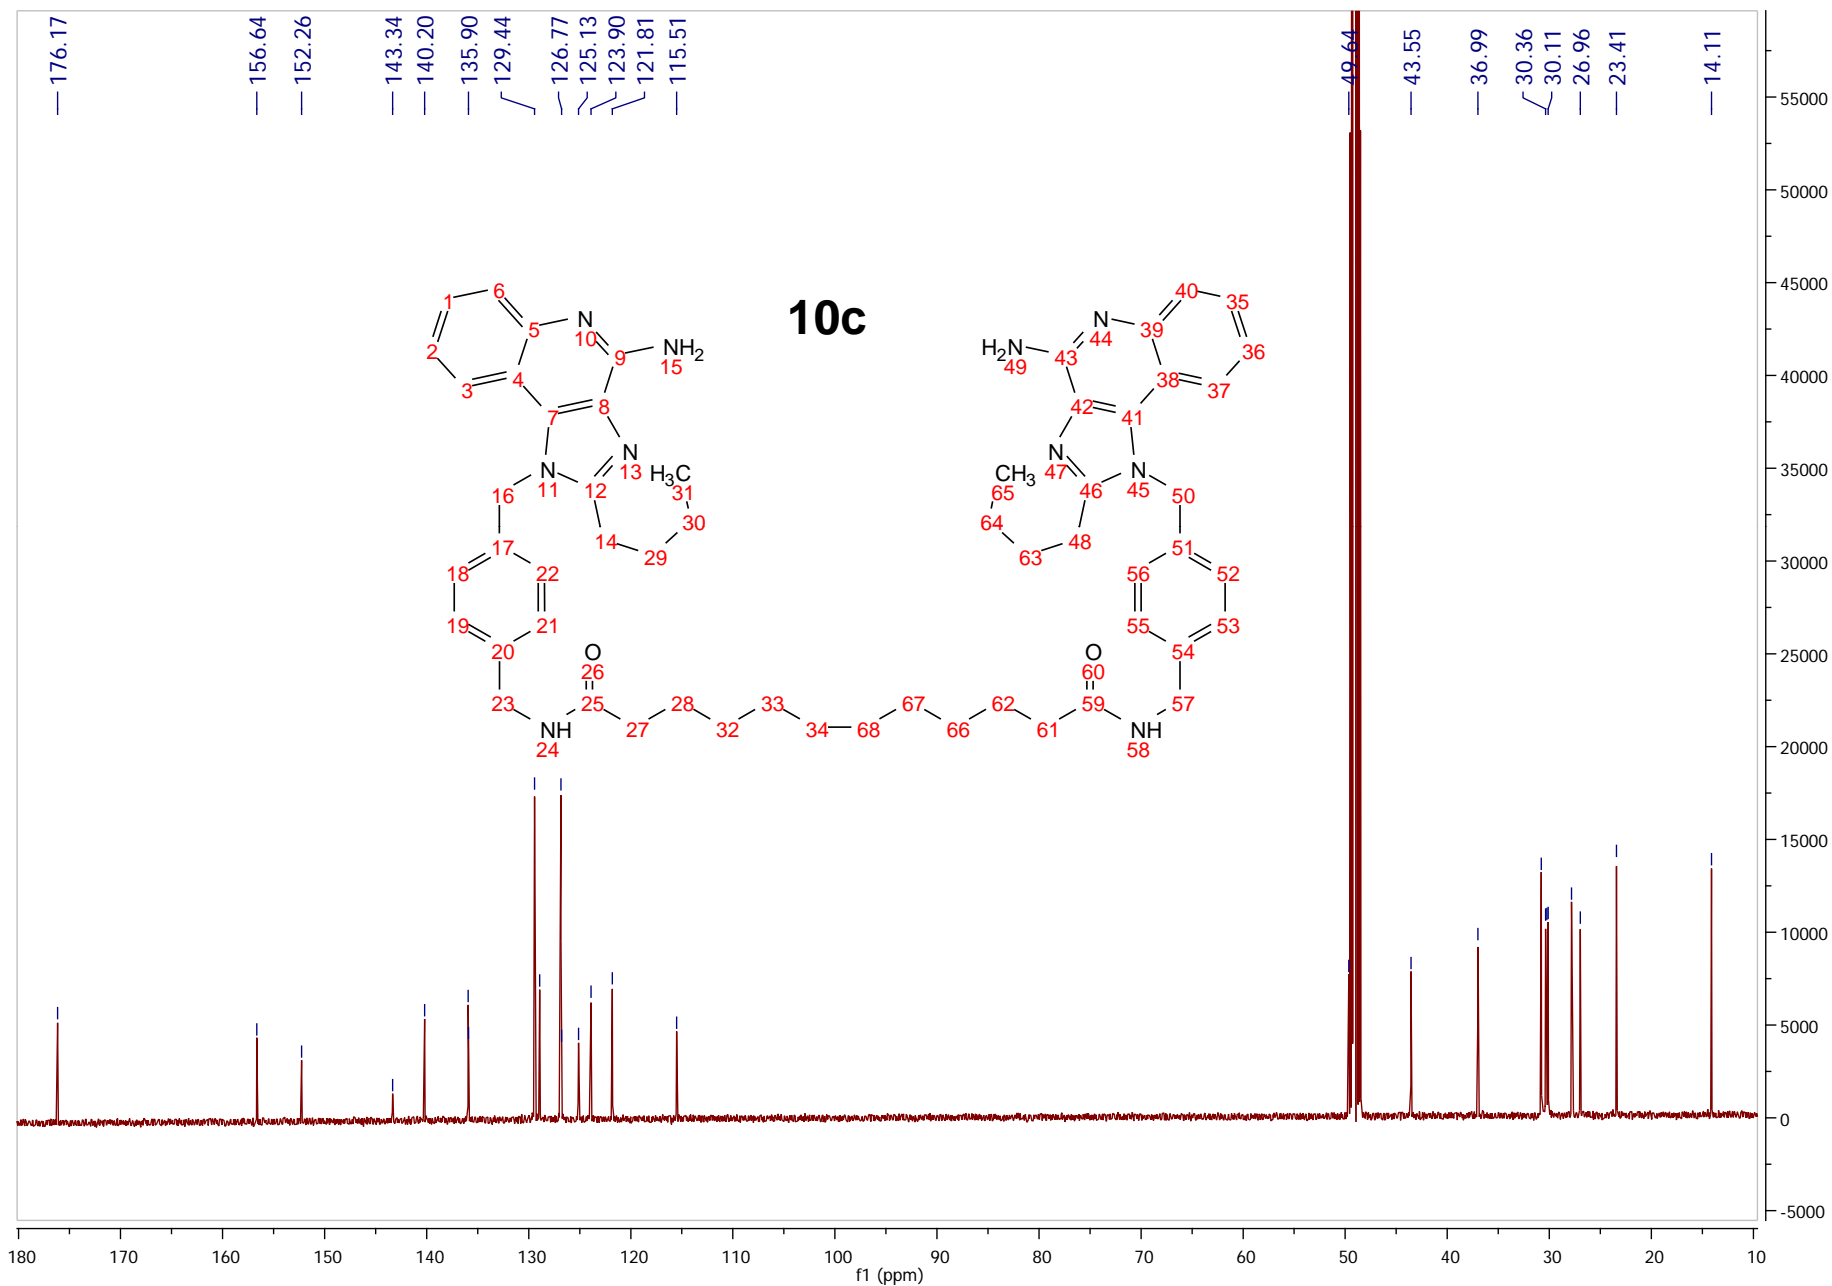

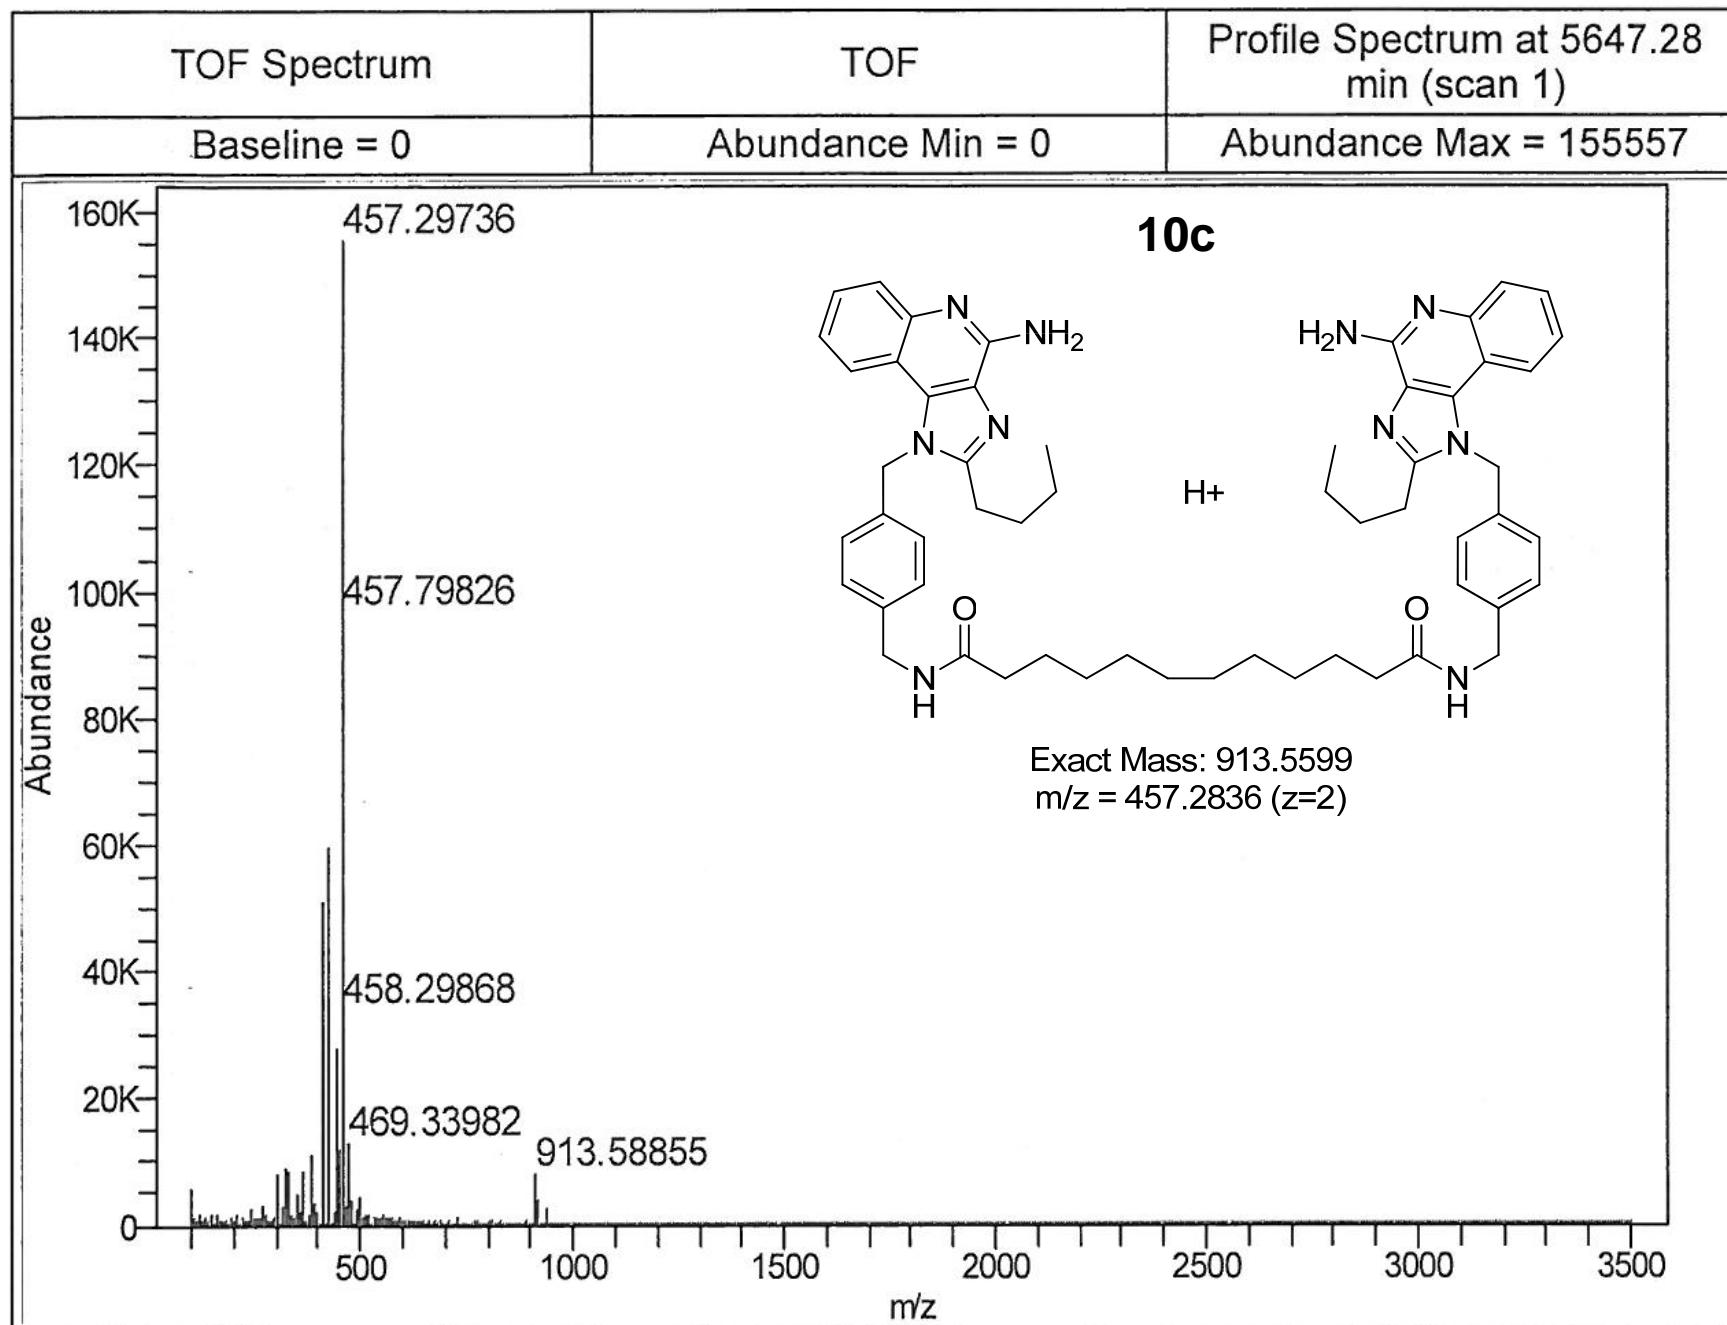

# <sup>1</sup>H Spectrum

S35

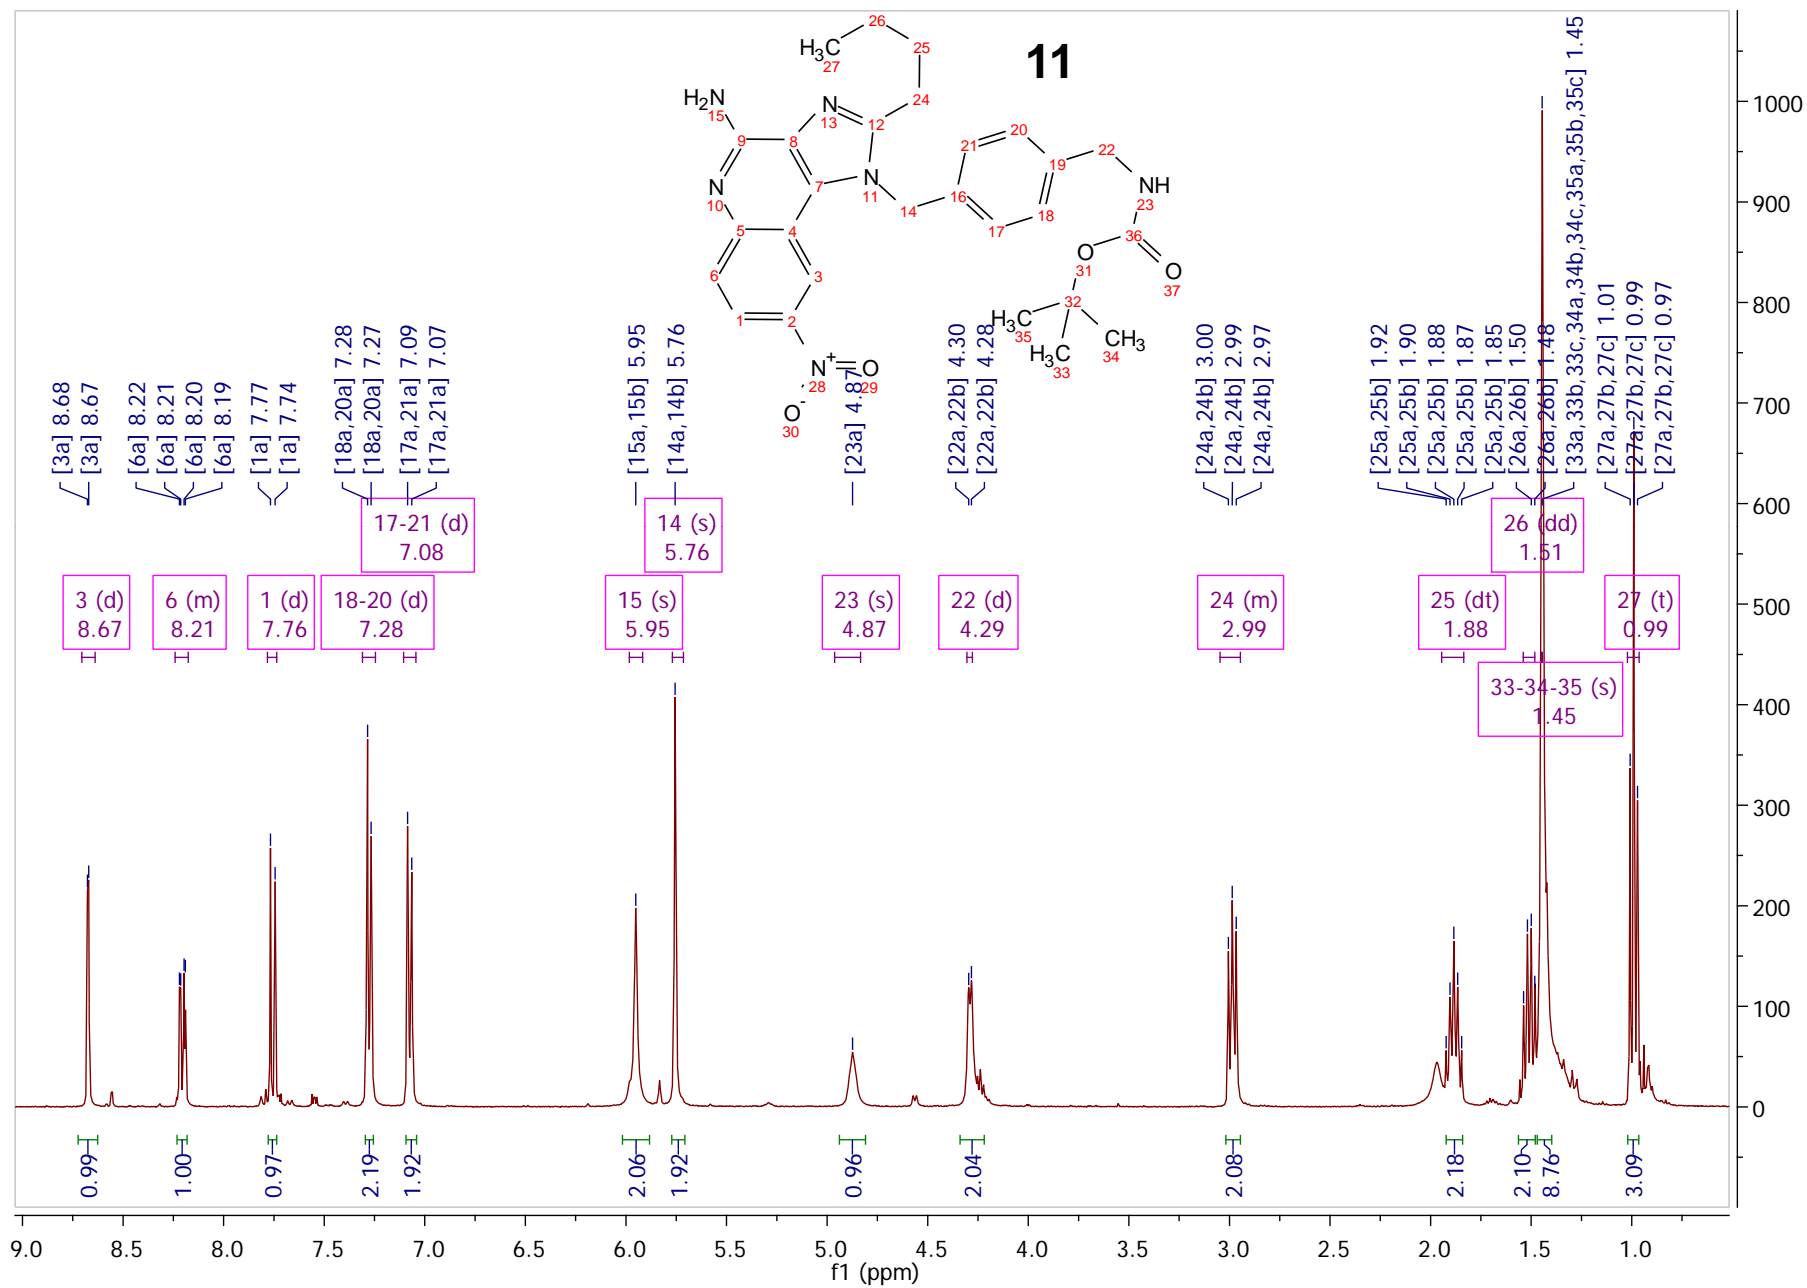

# <sup>13</sup>C Spectrum

S36

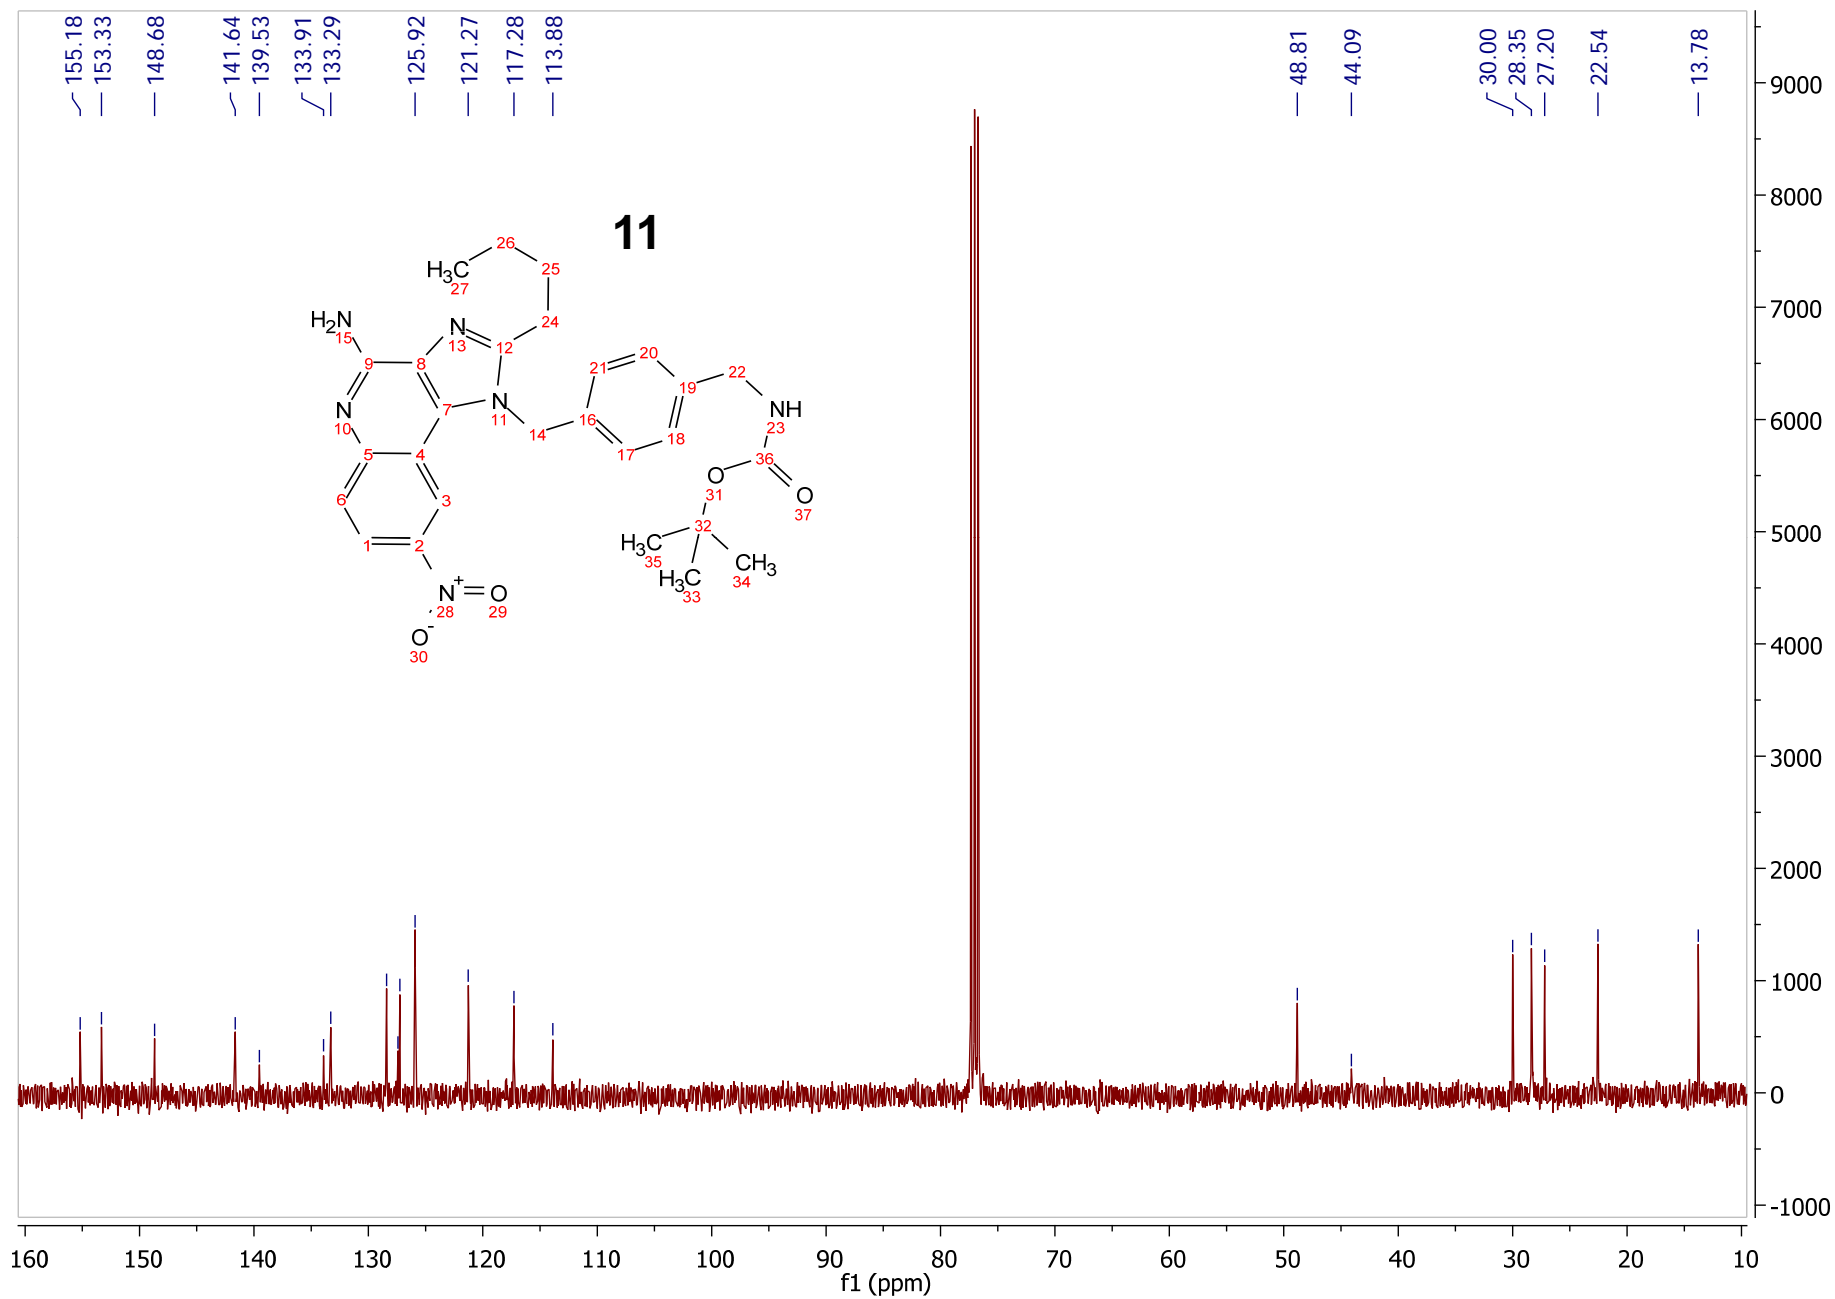

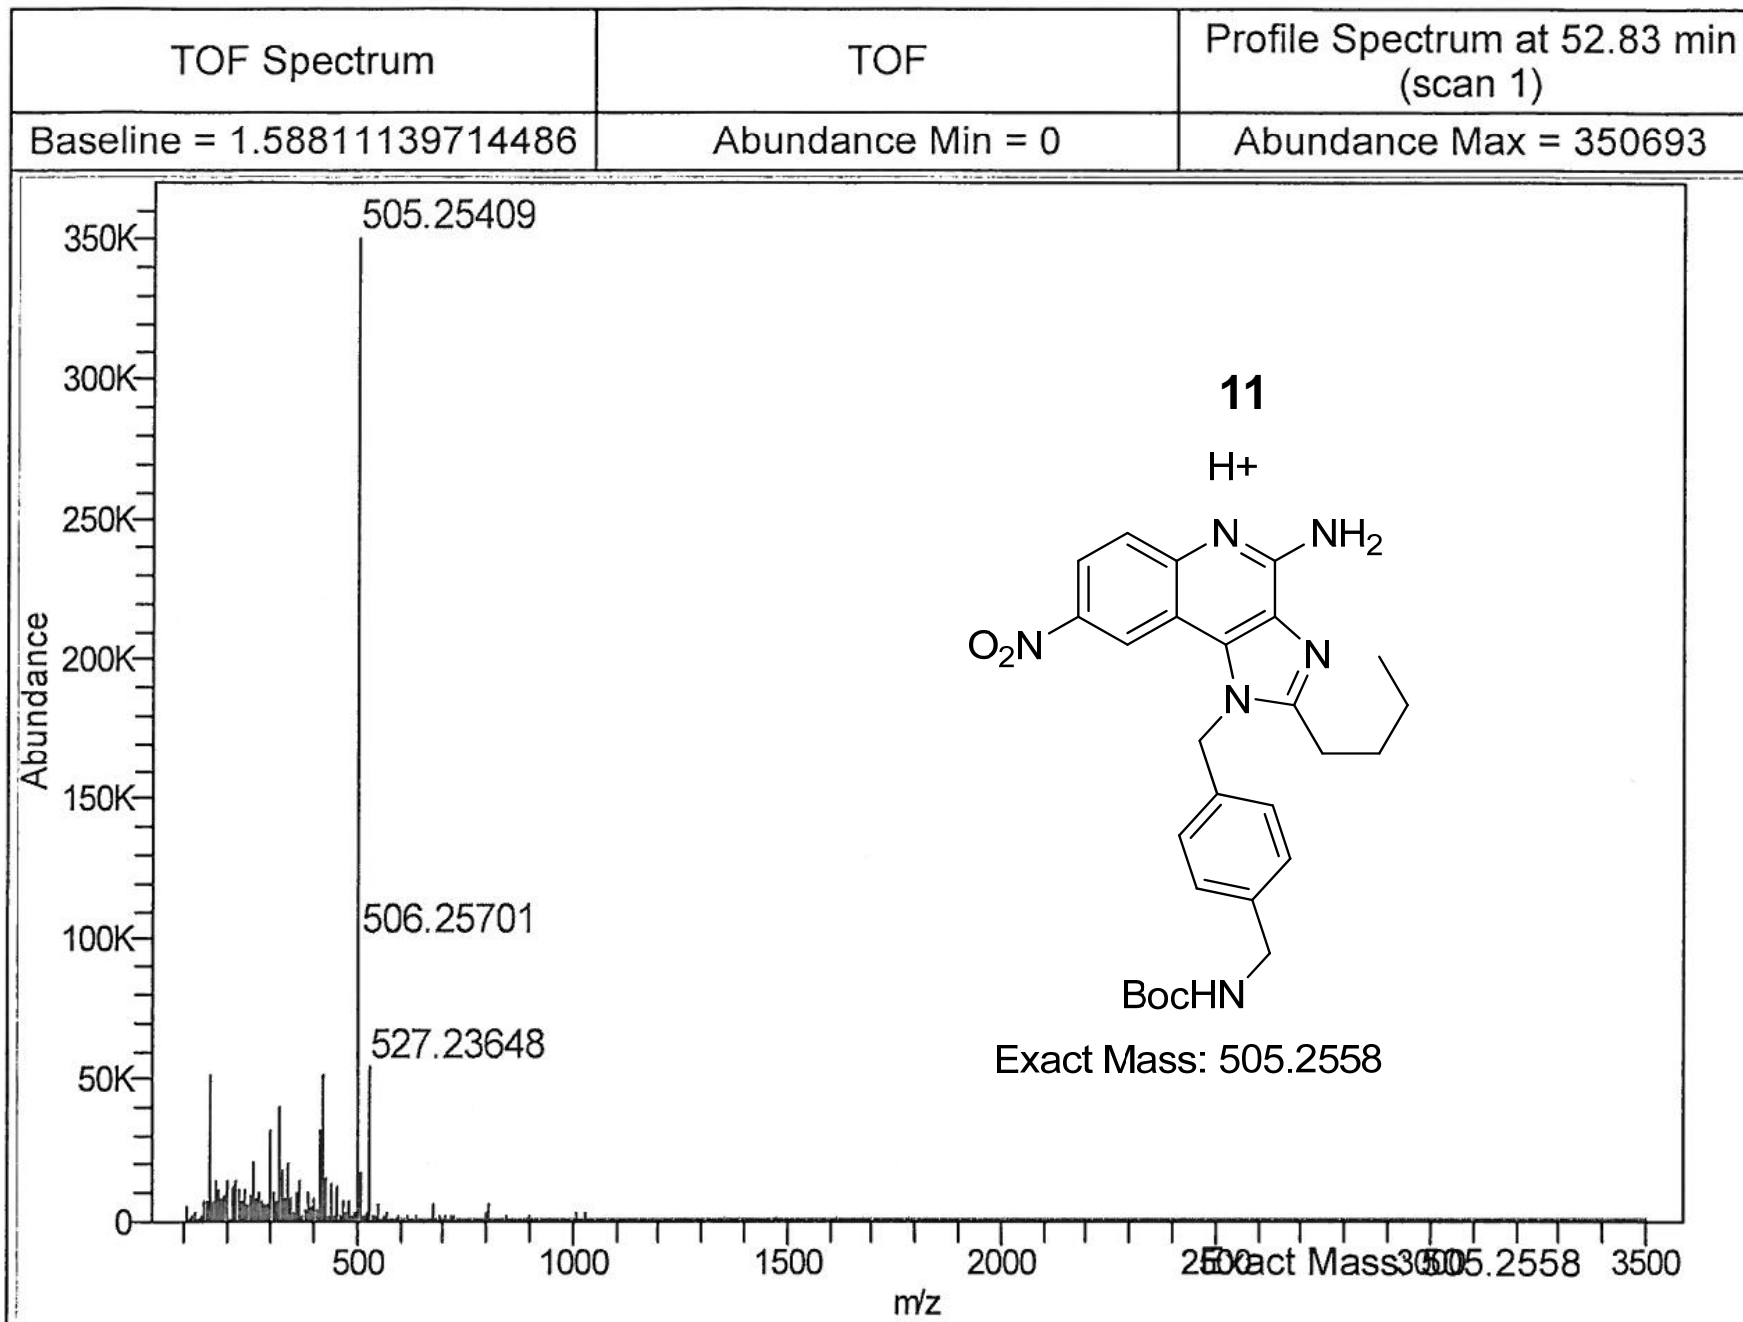

# <sup>1</sup>H Spectrum

S38

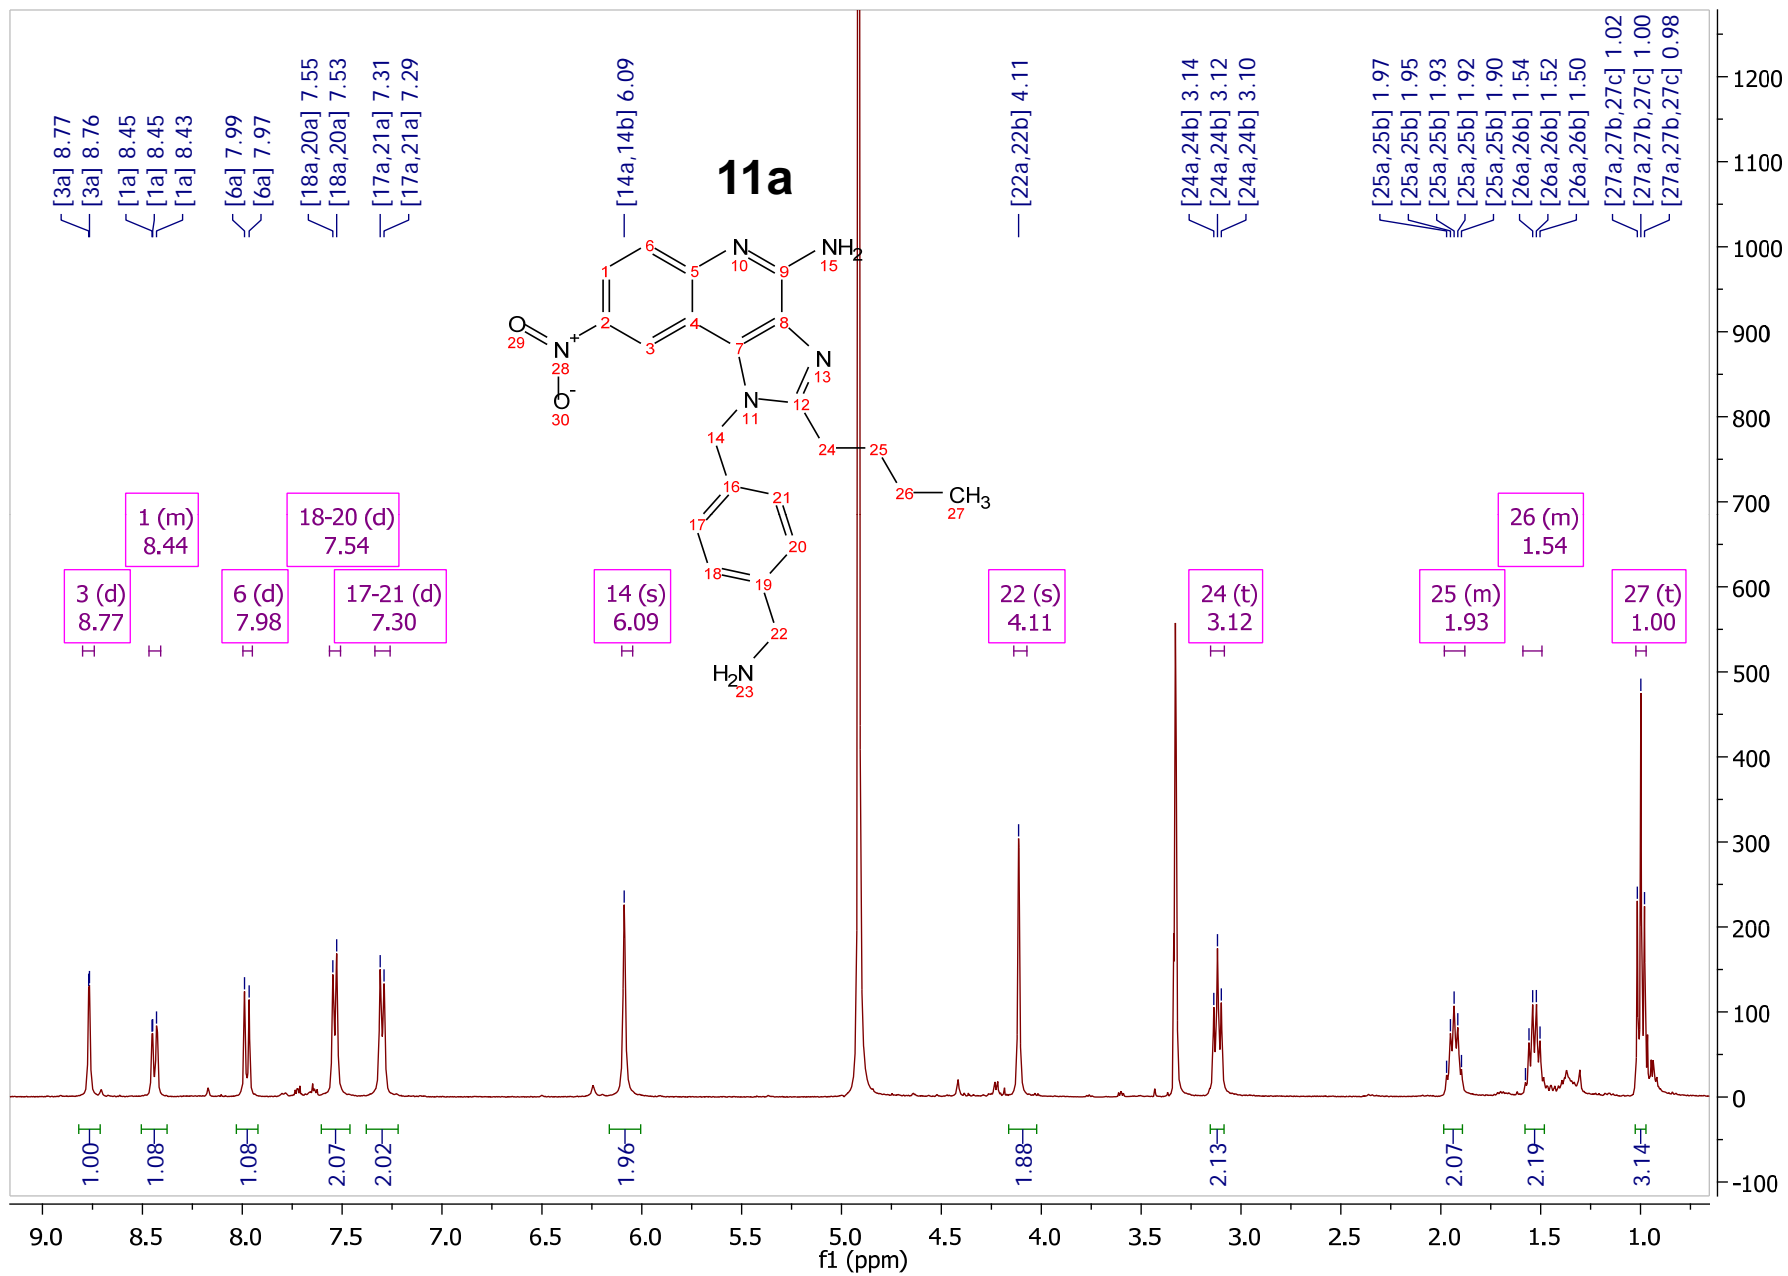

# <sup>13</sup>C Spectrum

S39

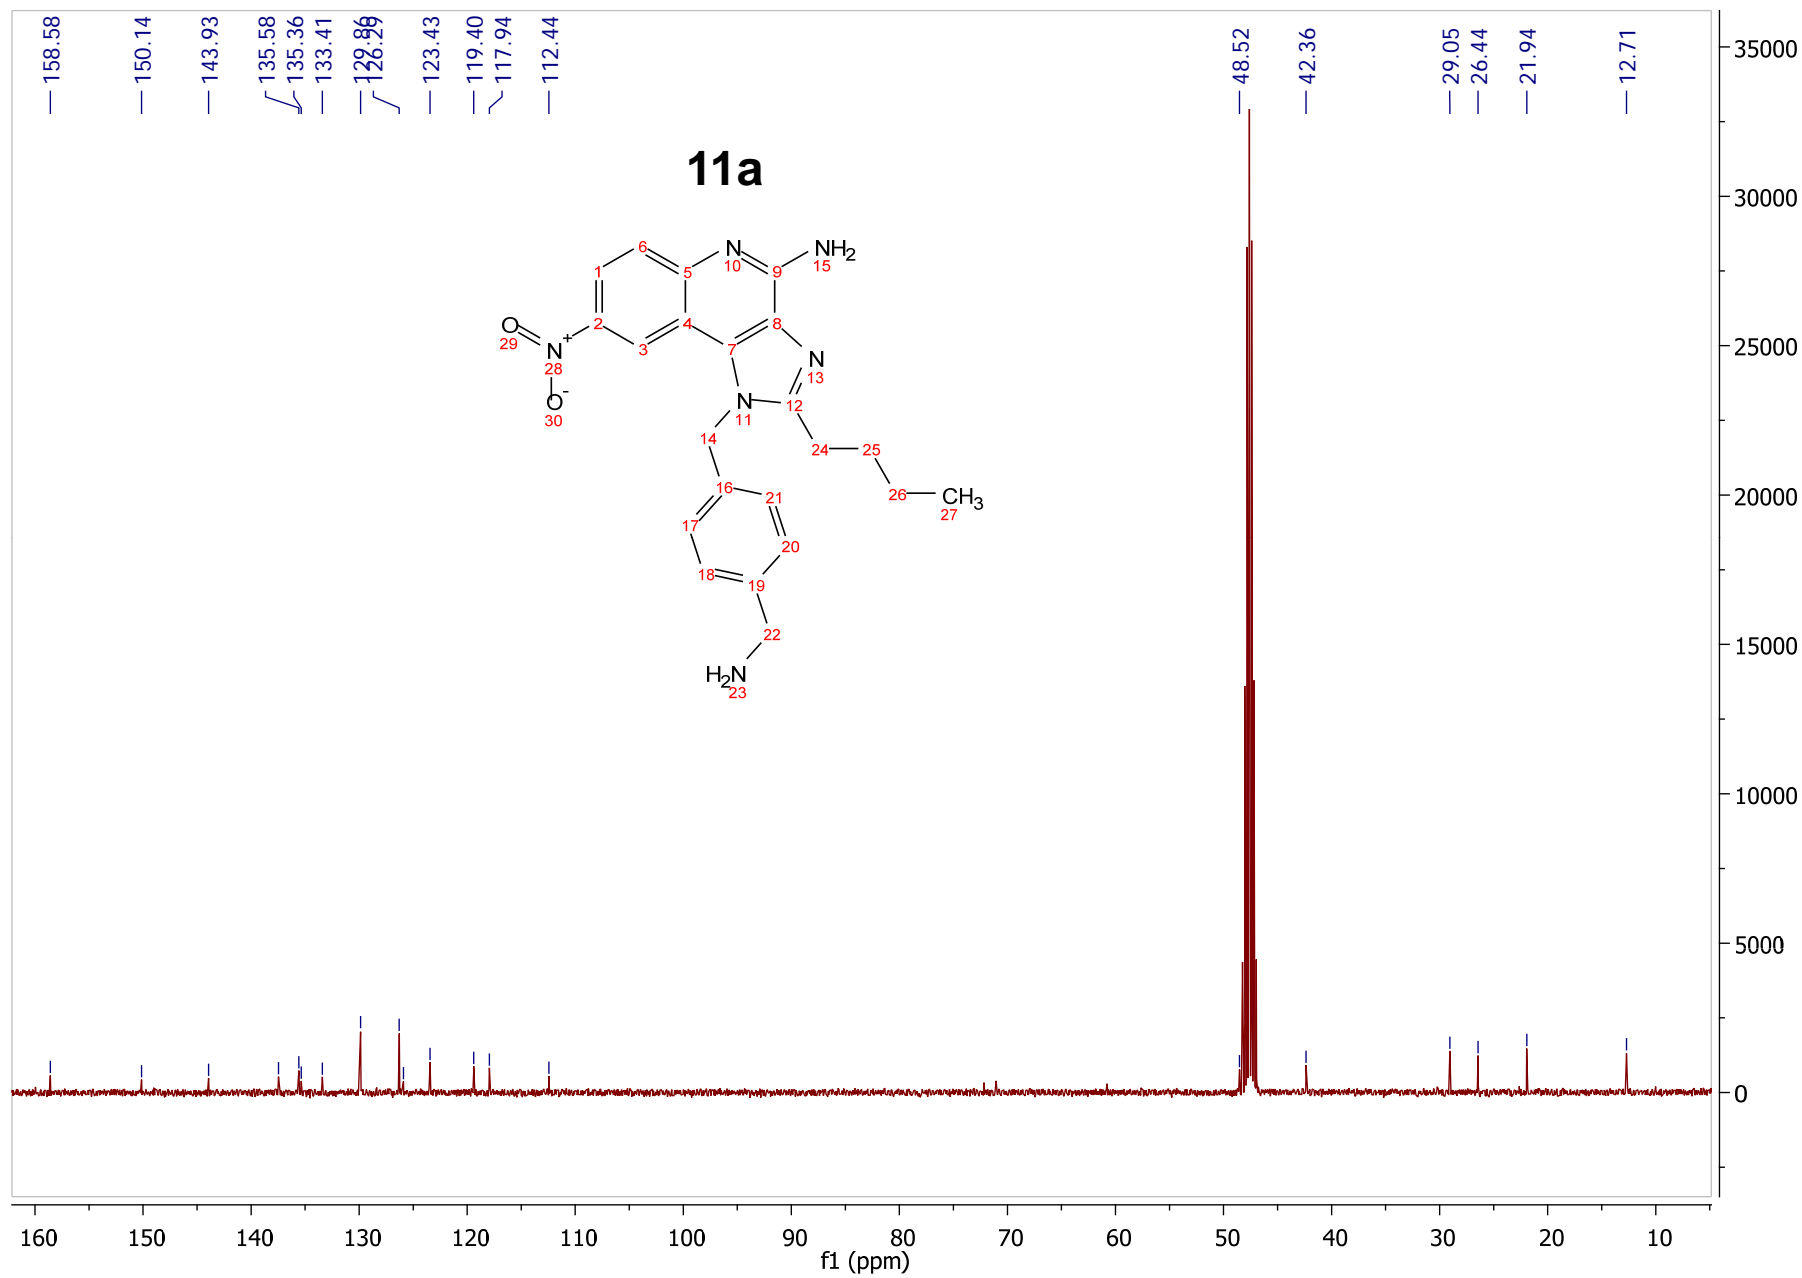

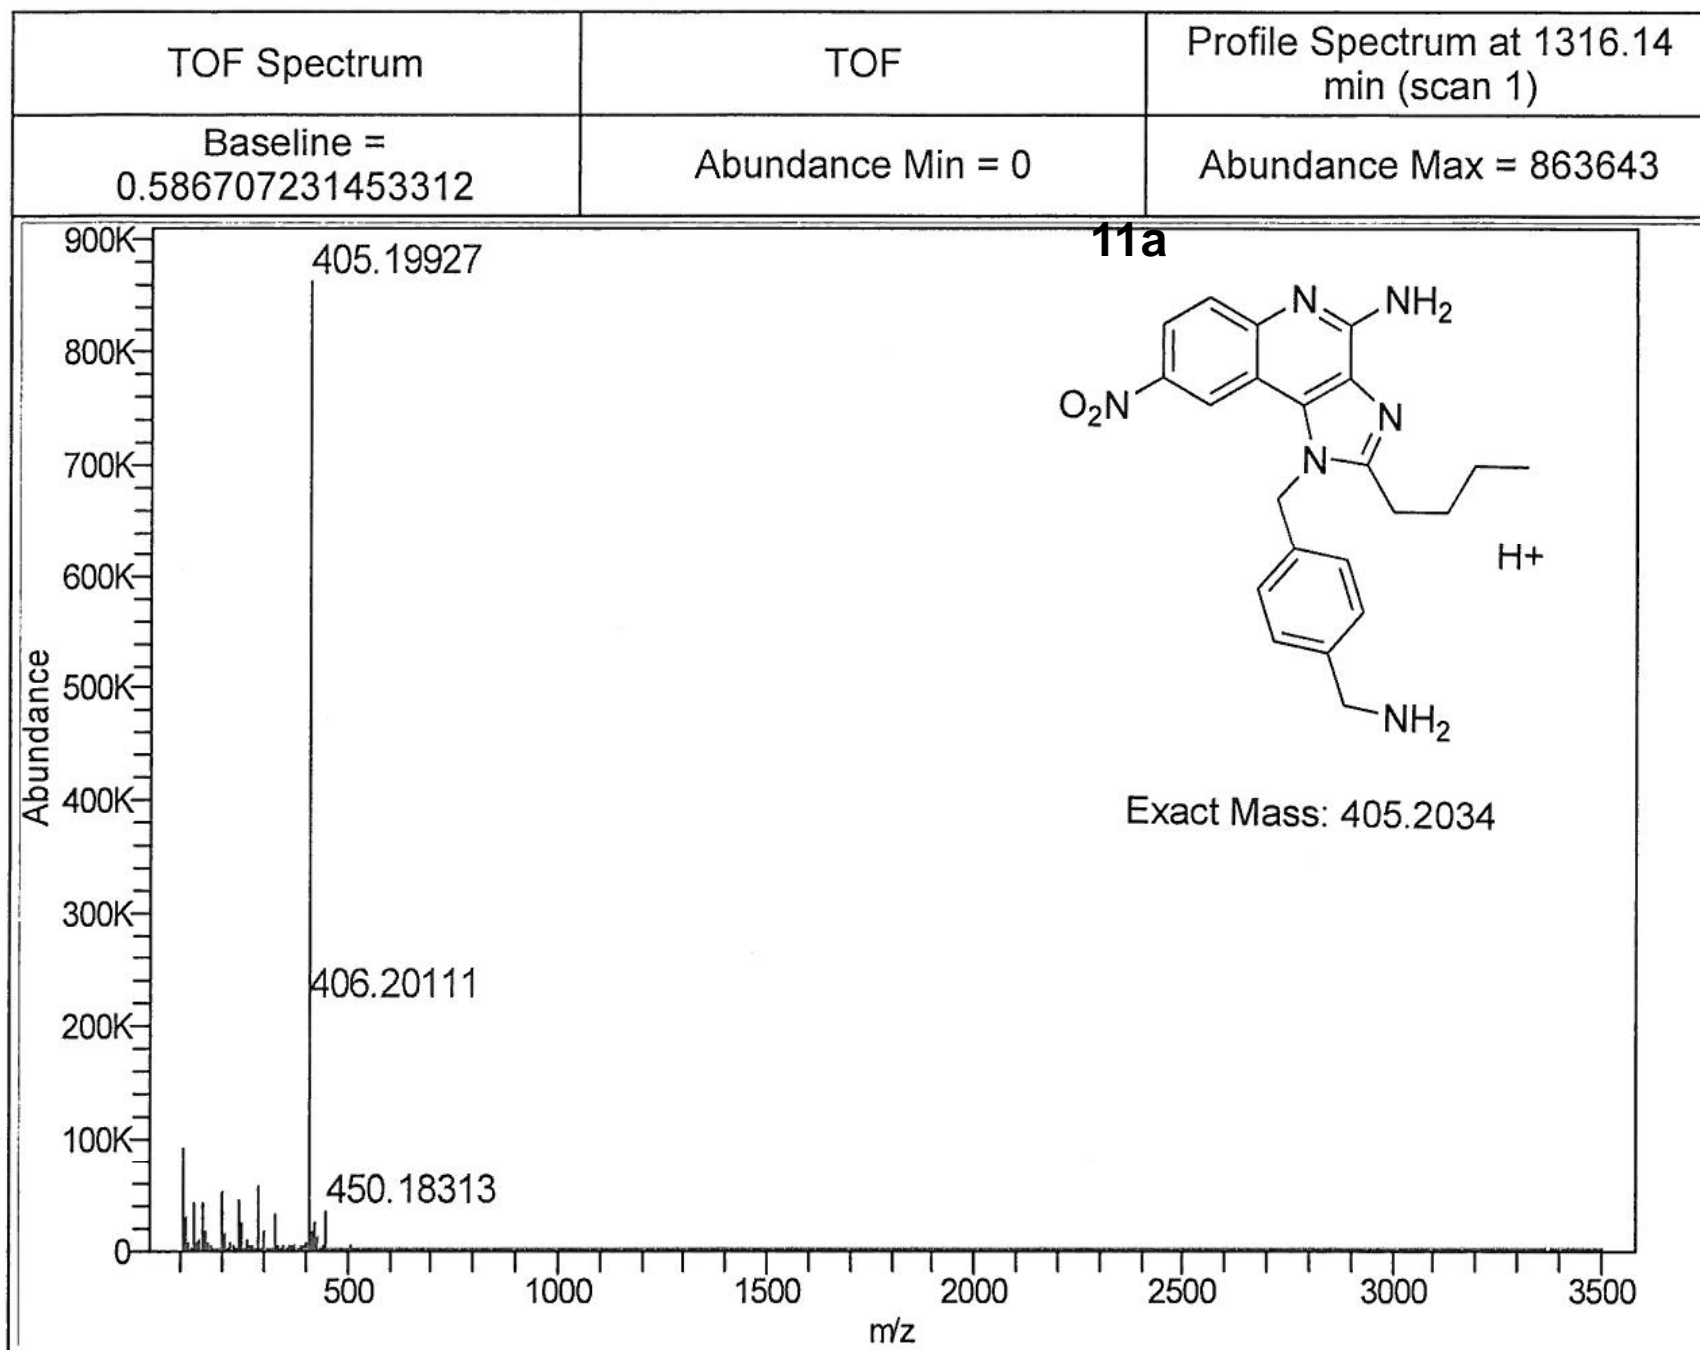



# <sup>1</sup>H Spectrum

S41

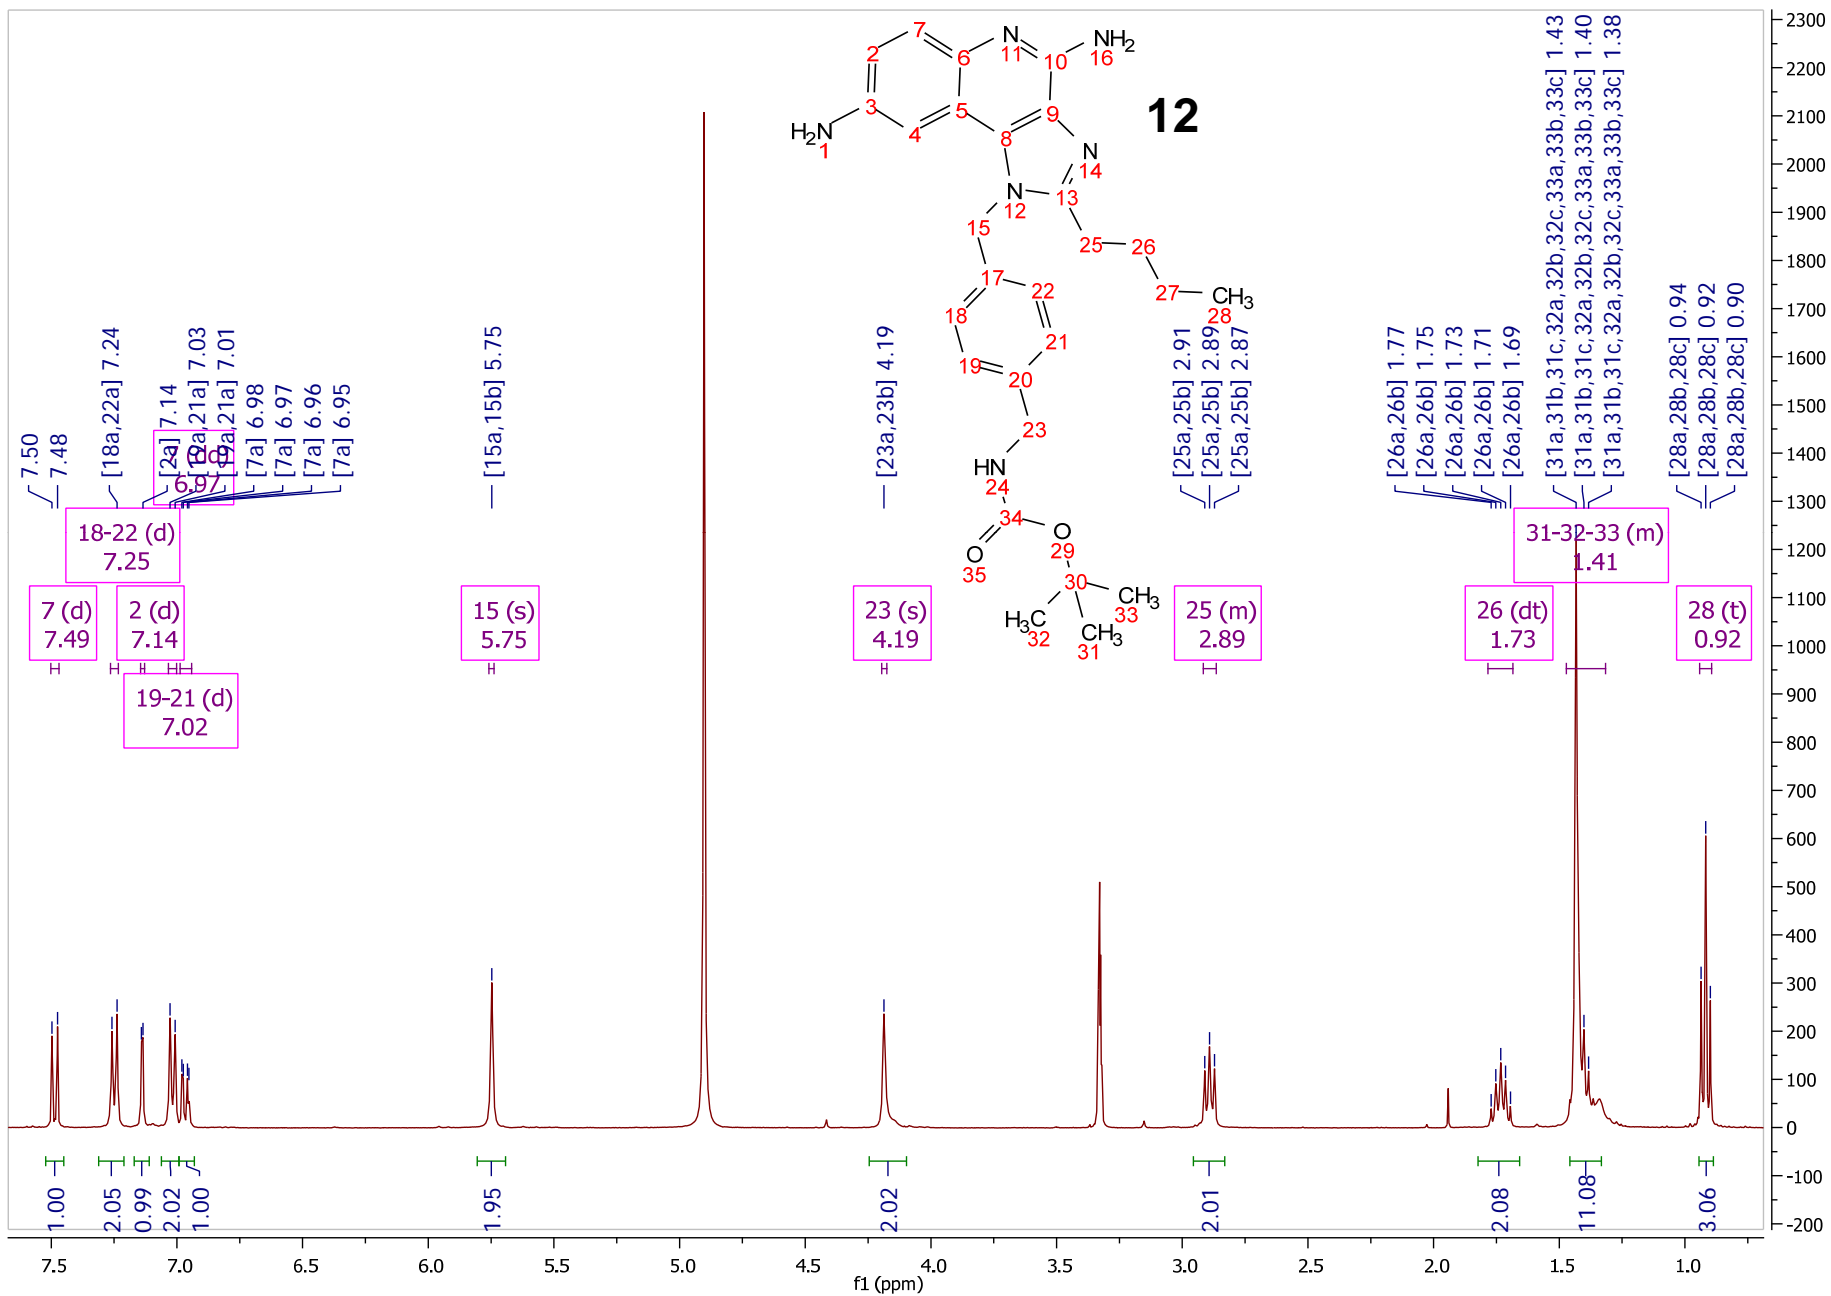

# <sup>13</sup>C Spectrum

S42

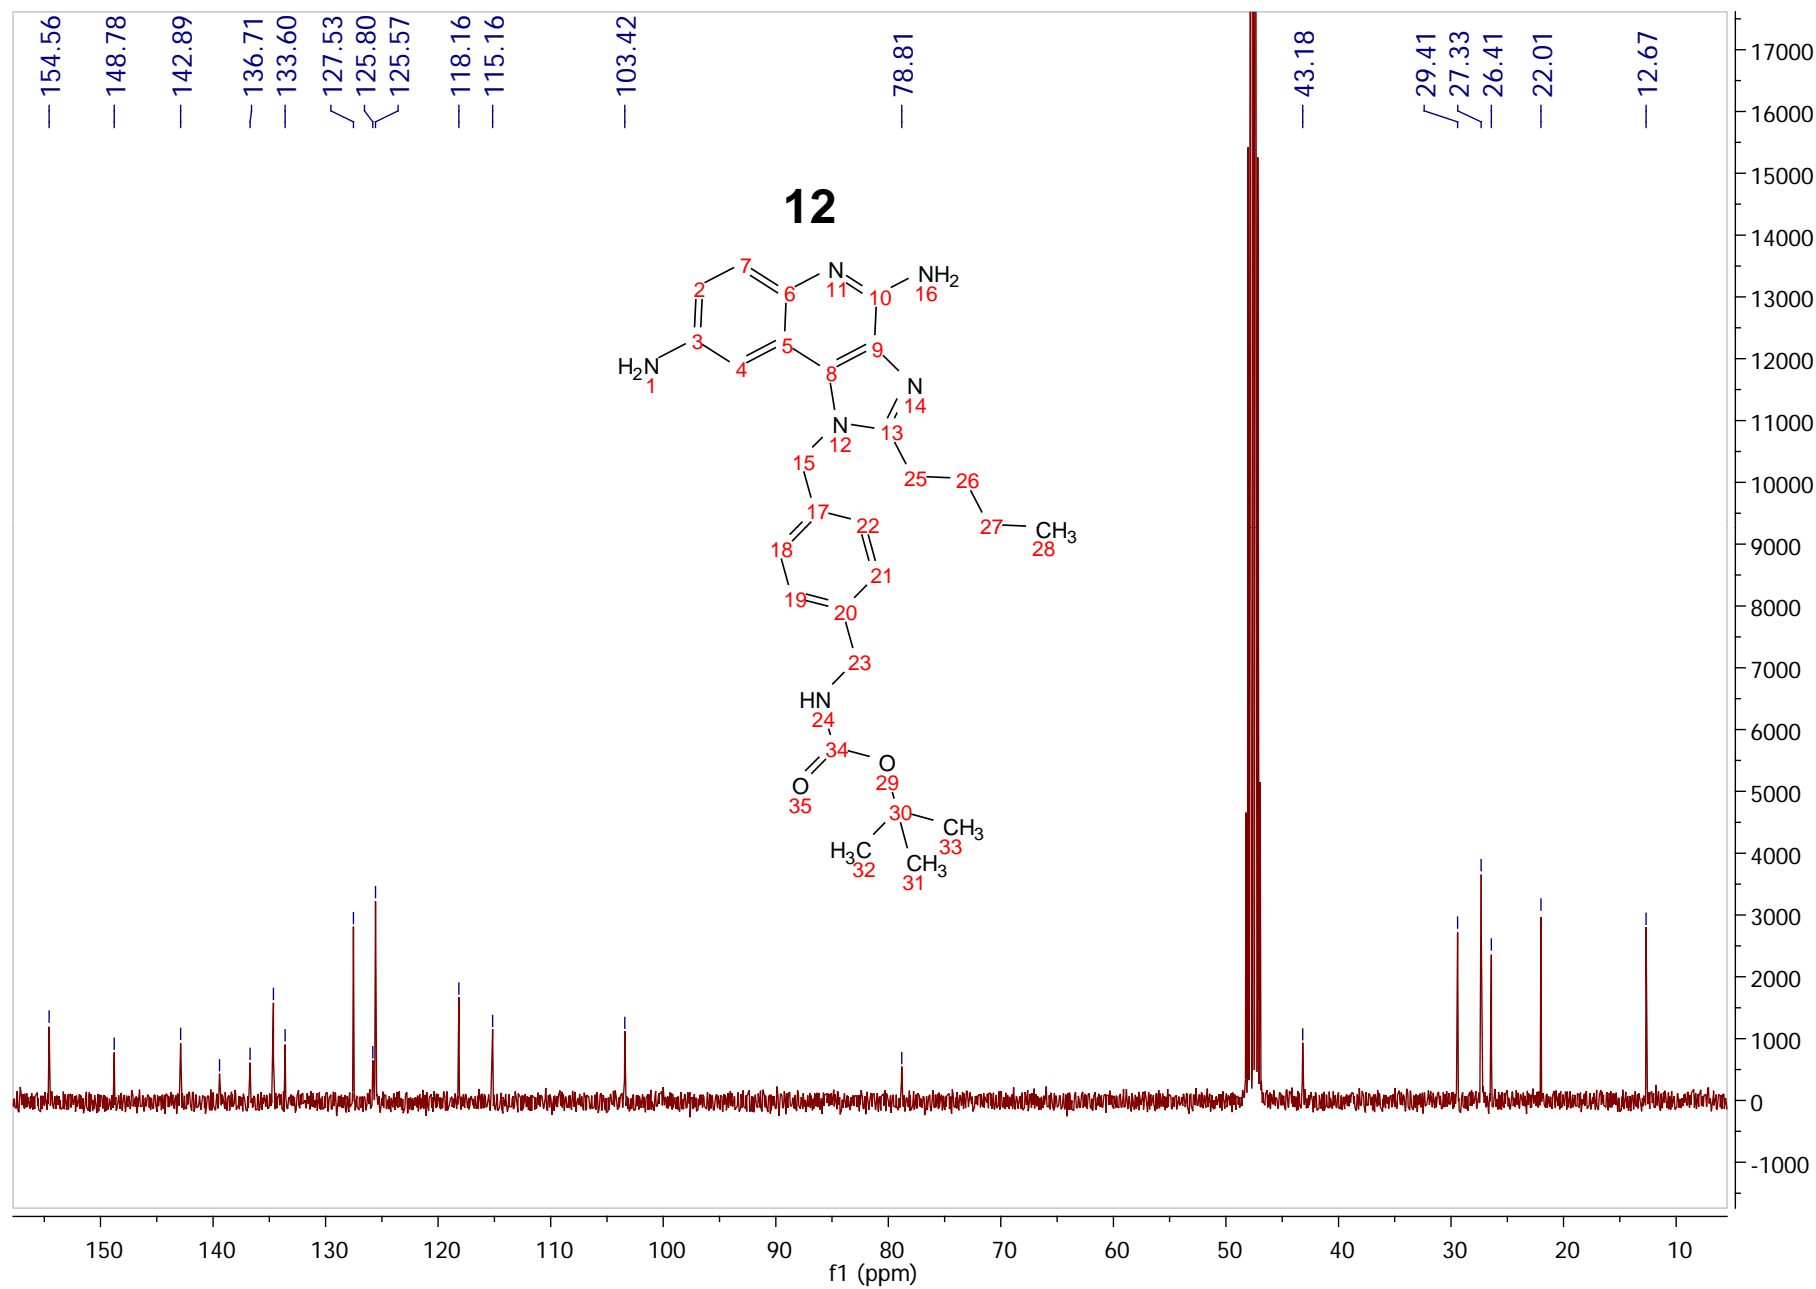

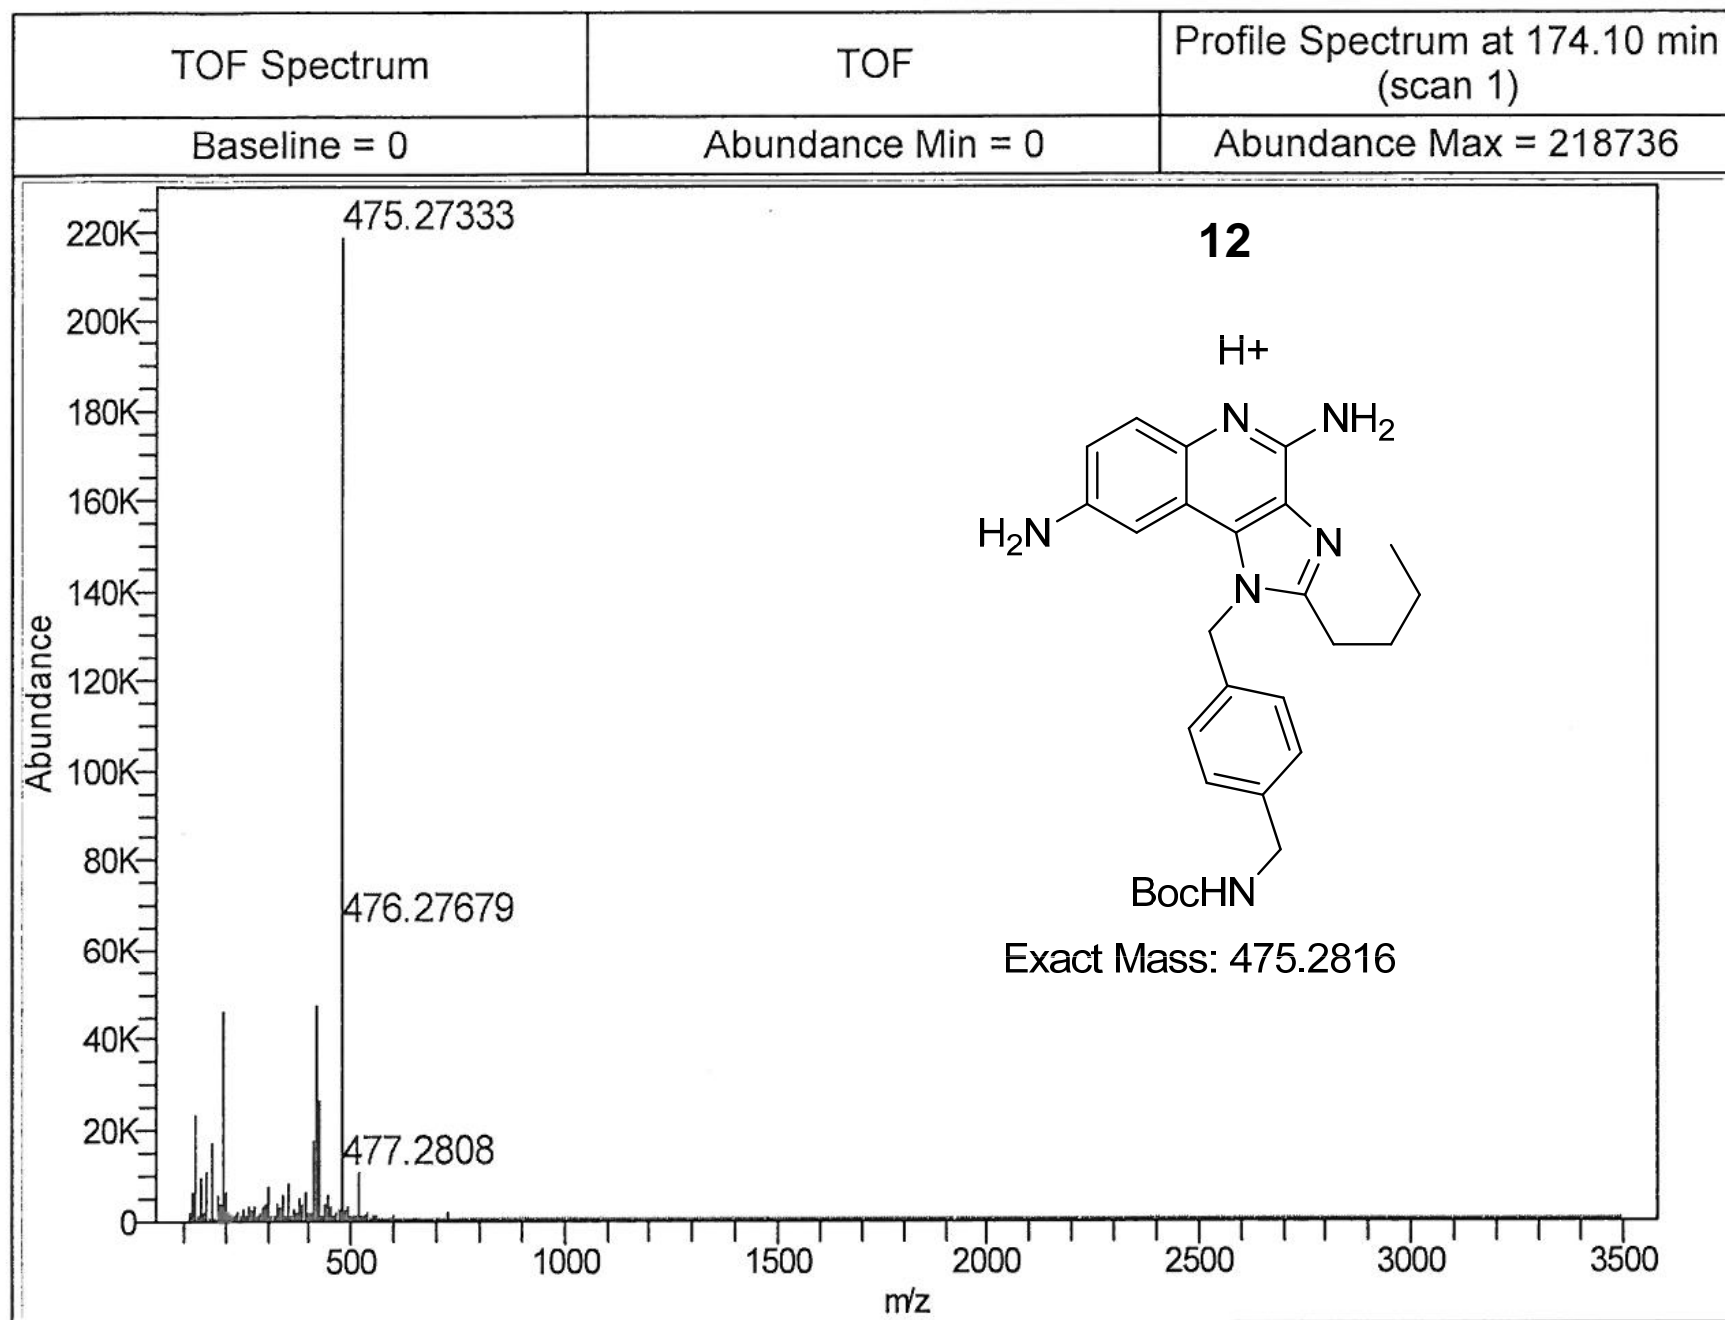

# <sup>1</sup>H Spectrum

S44

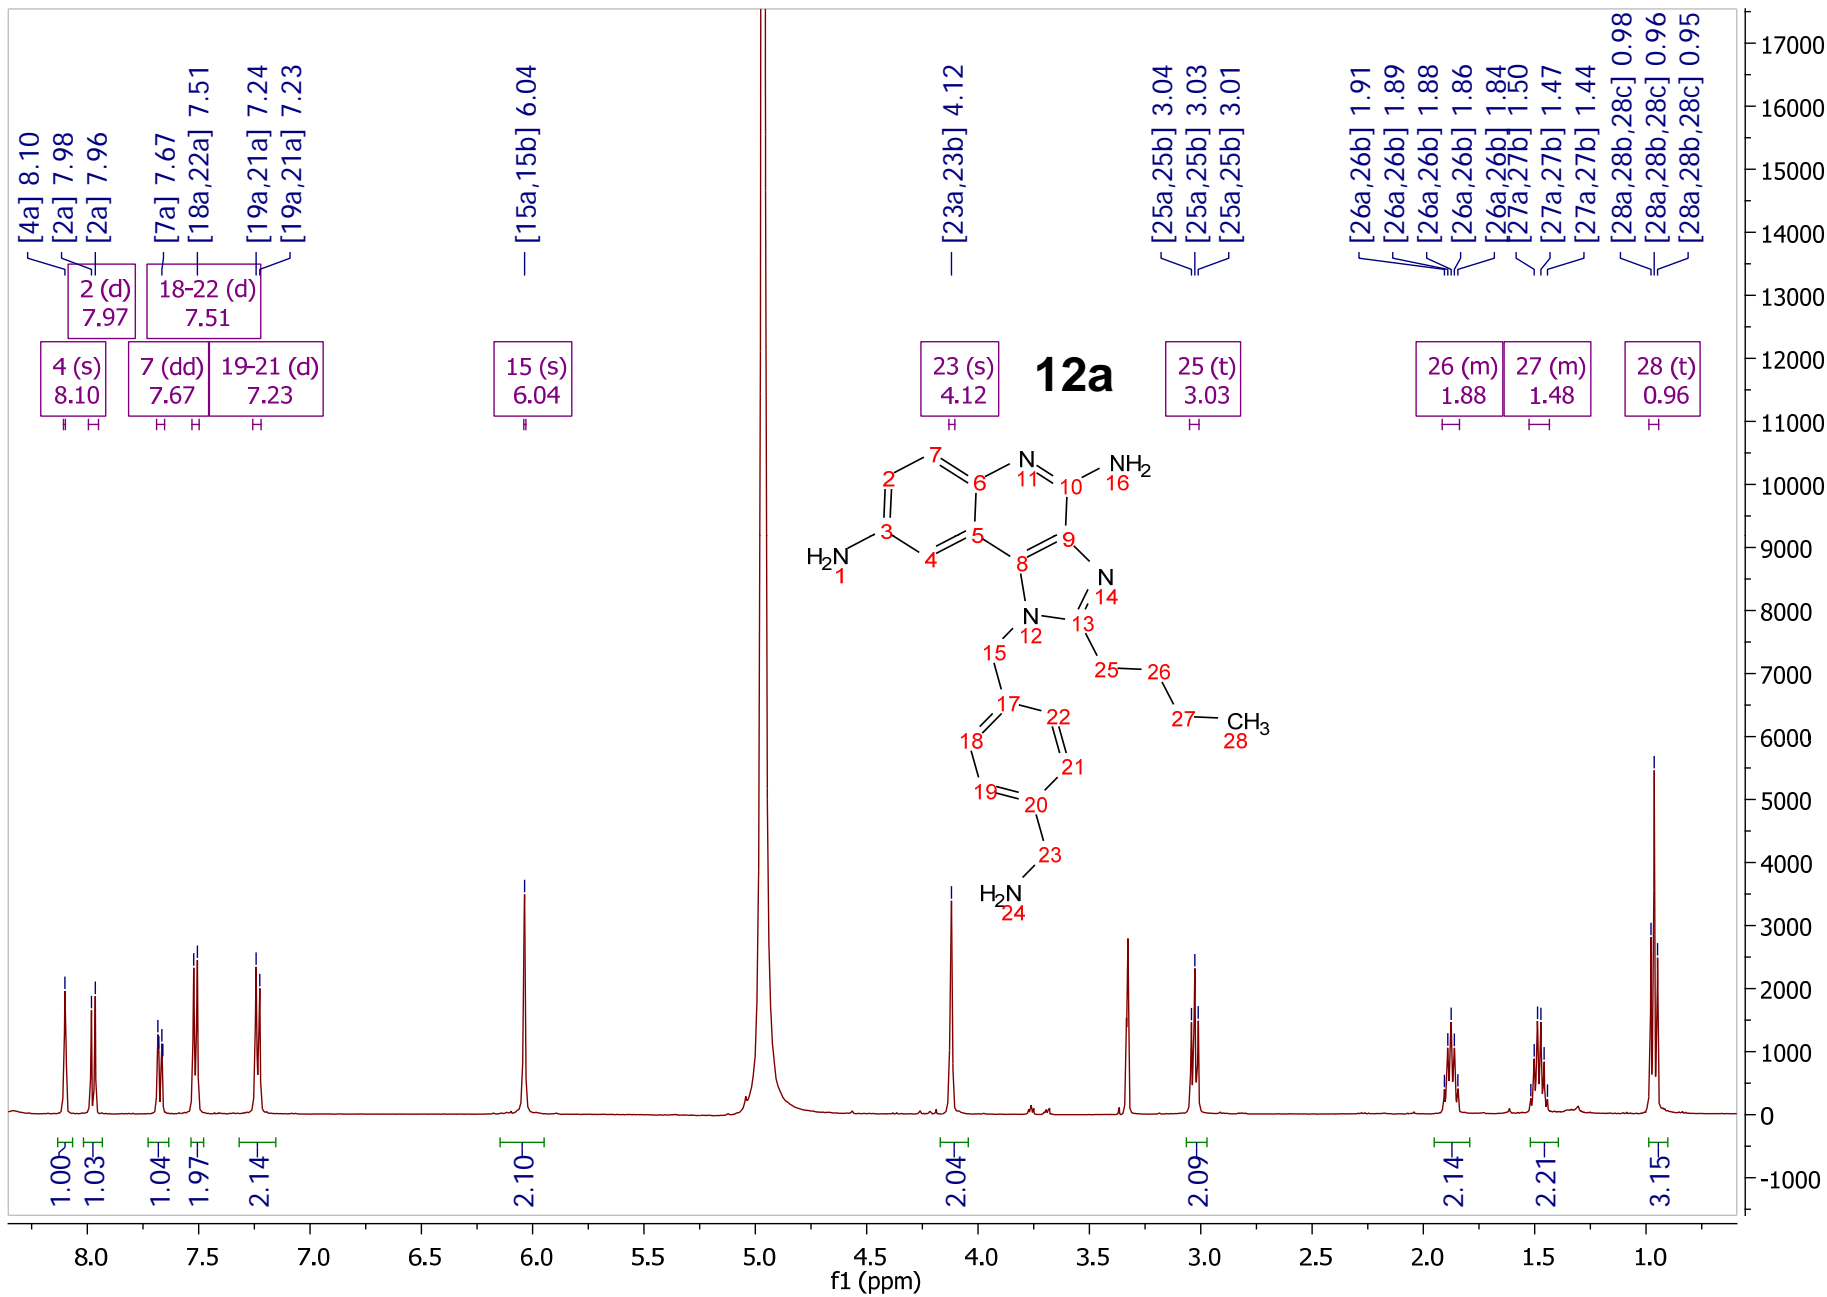

# <sup>13</sup>C Spectrum

S45

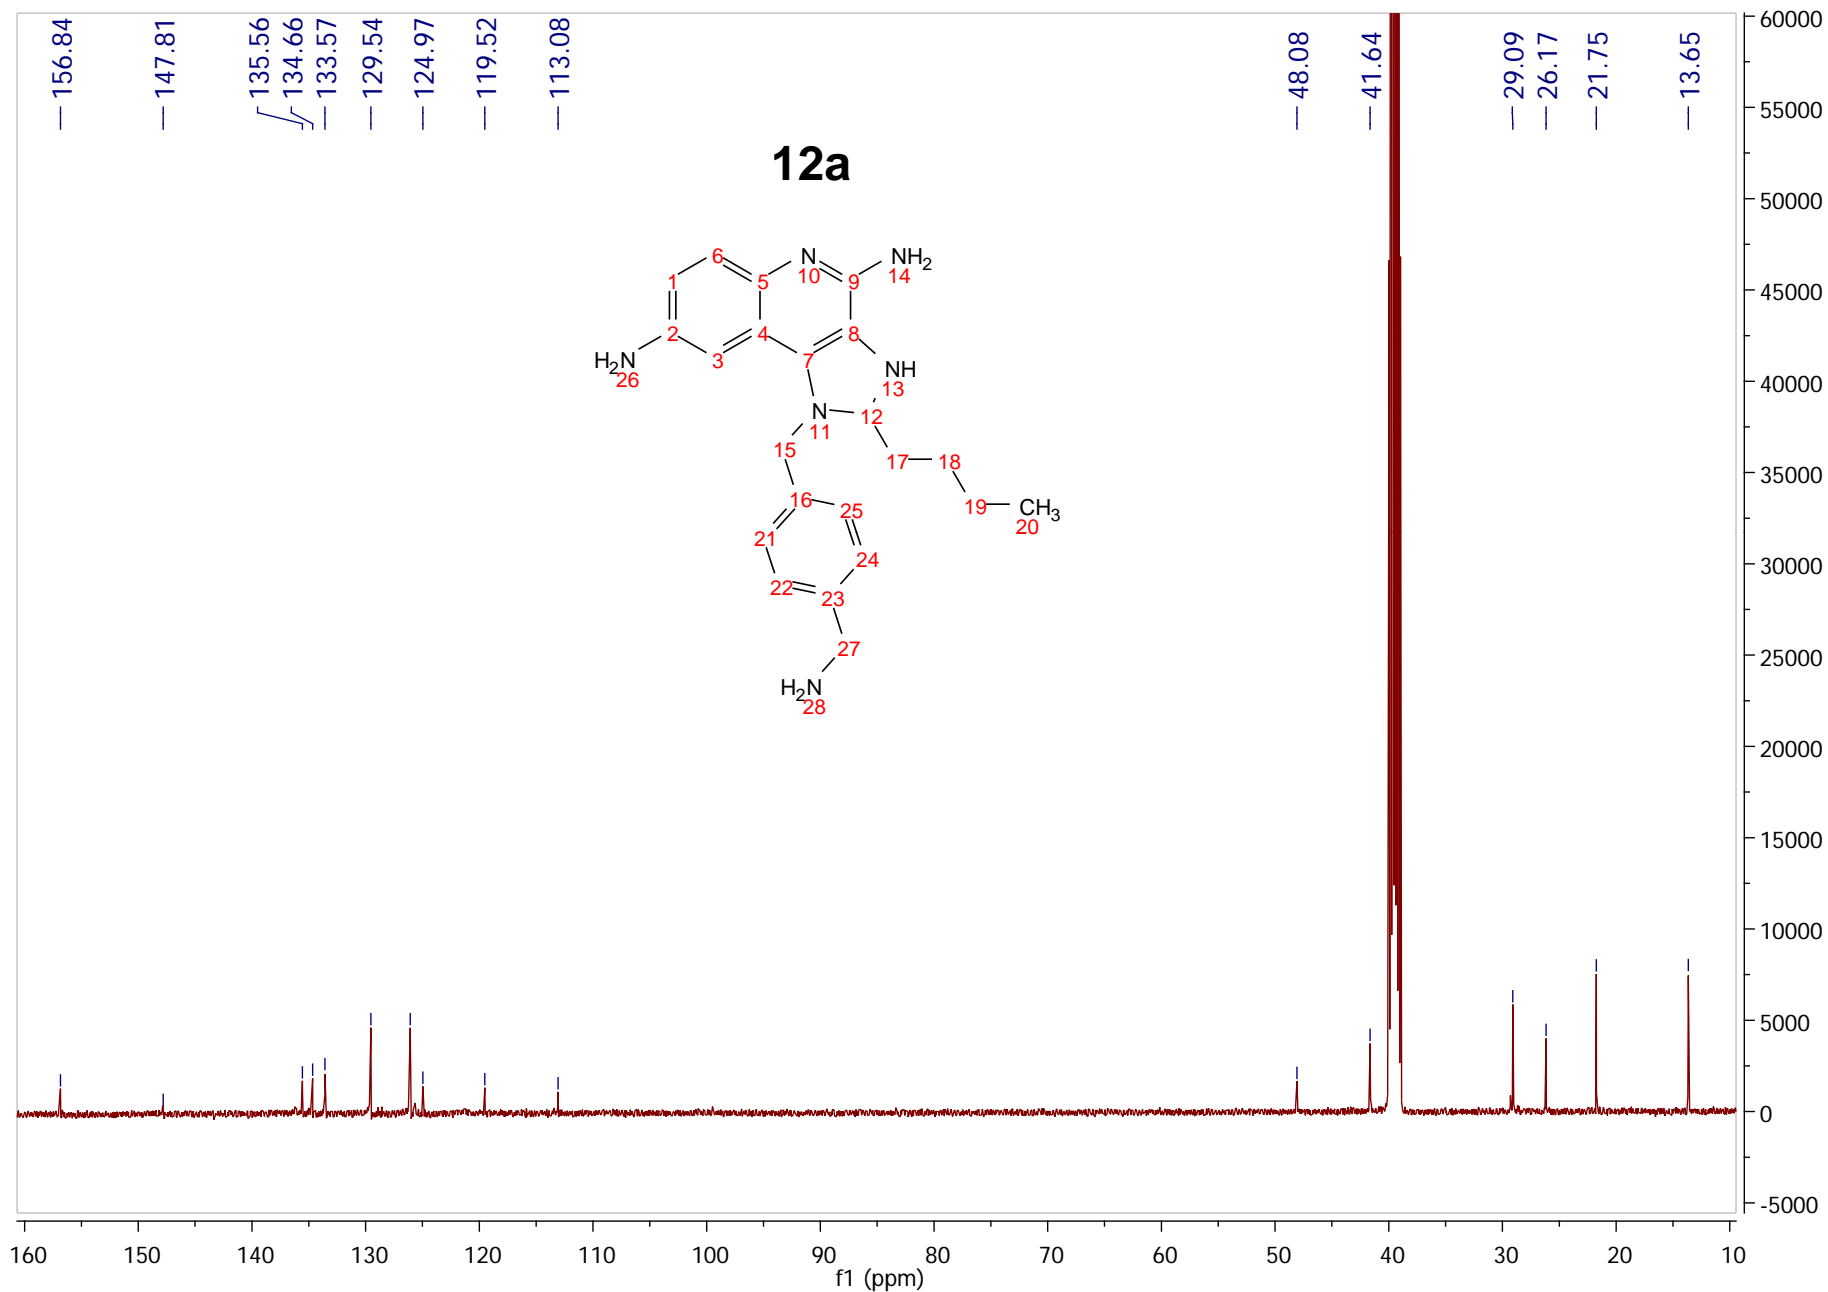

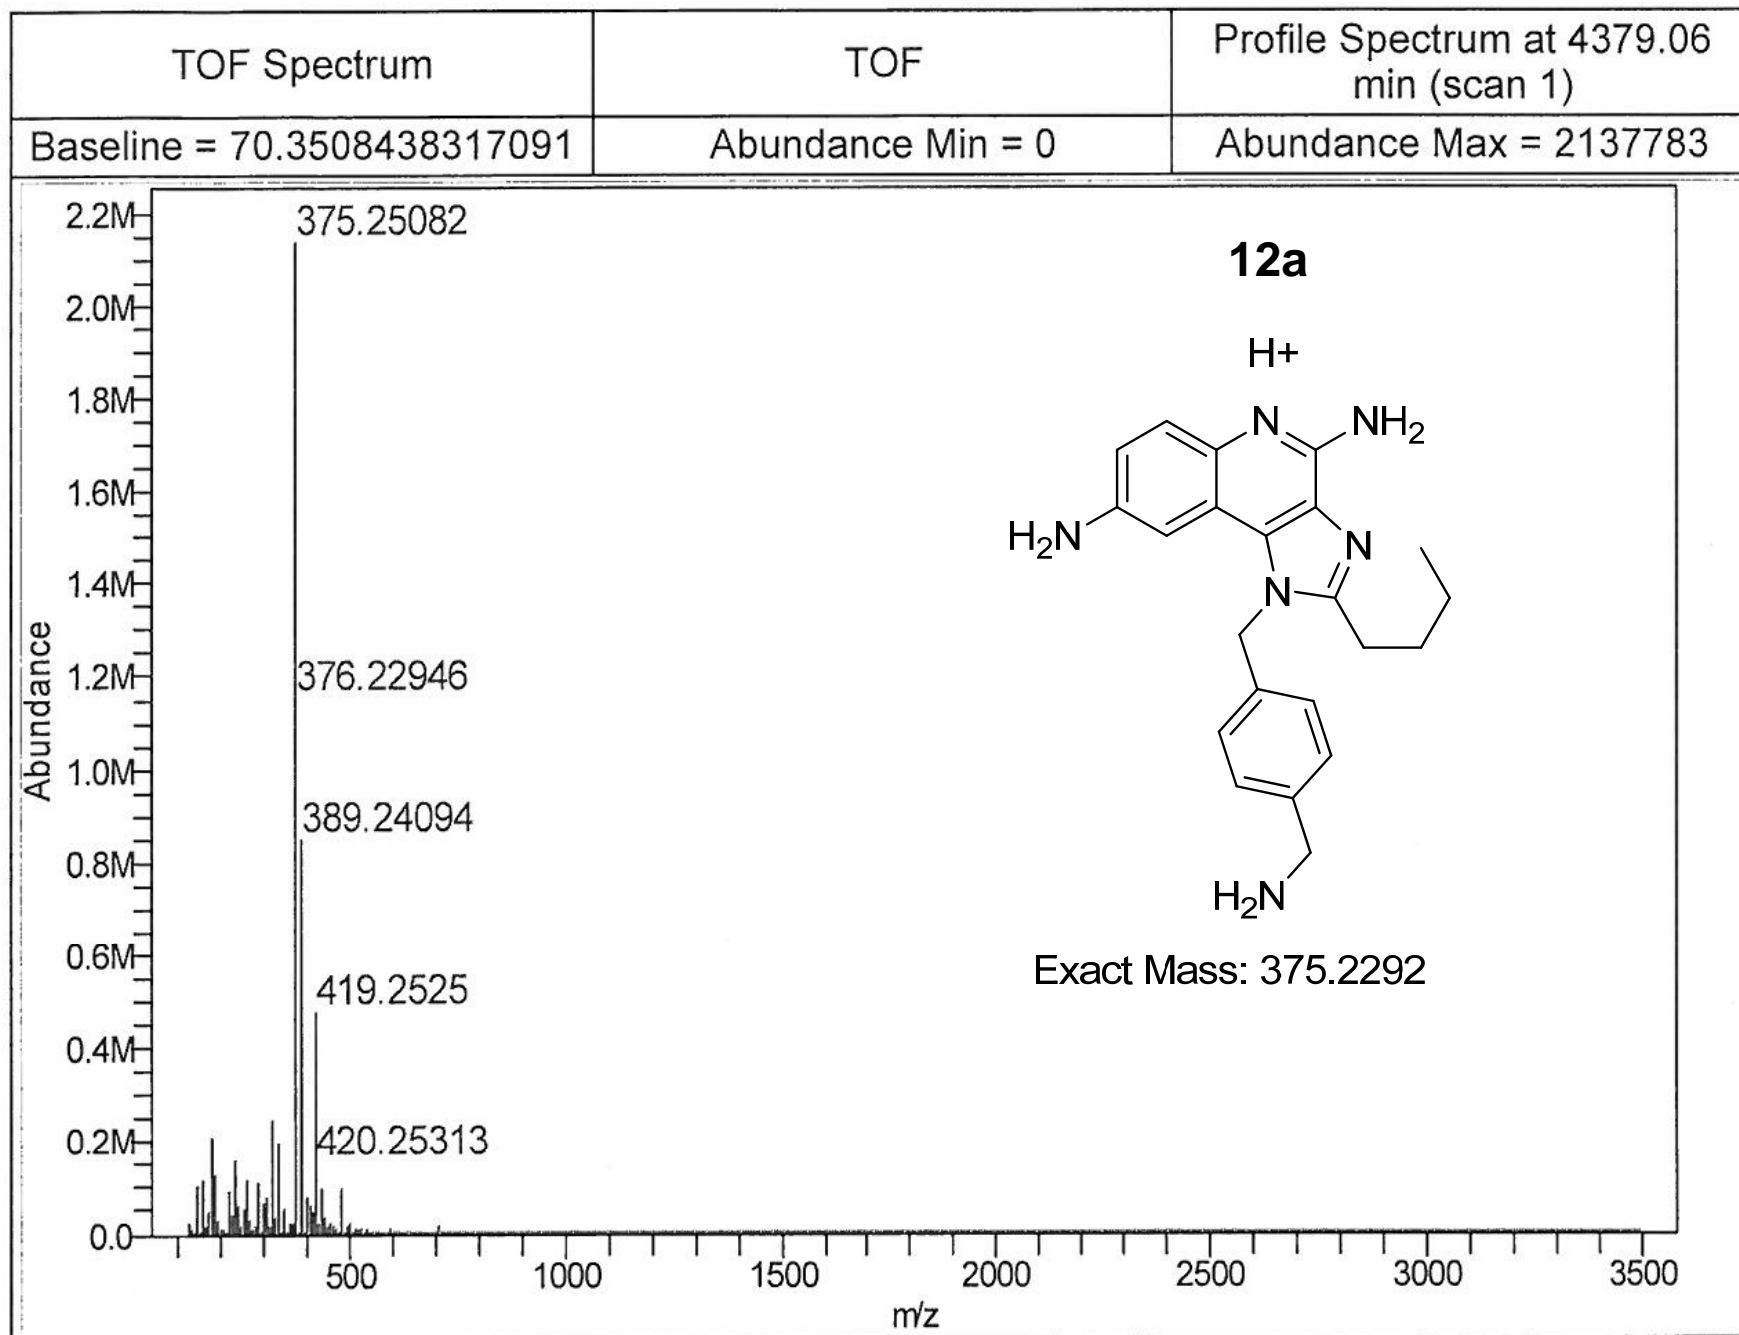

# <sup>1</sup>H Spectrum

S47

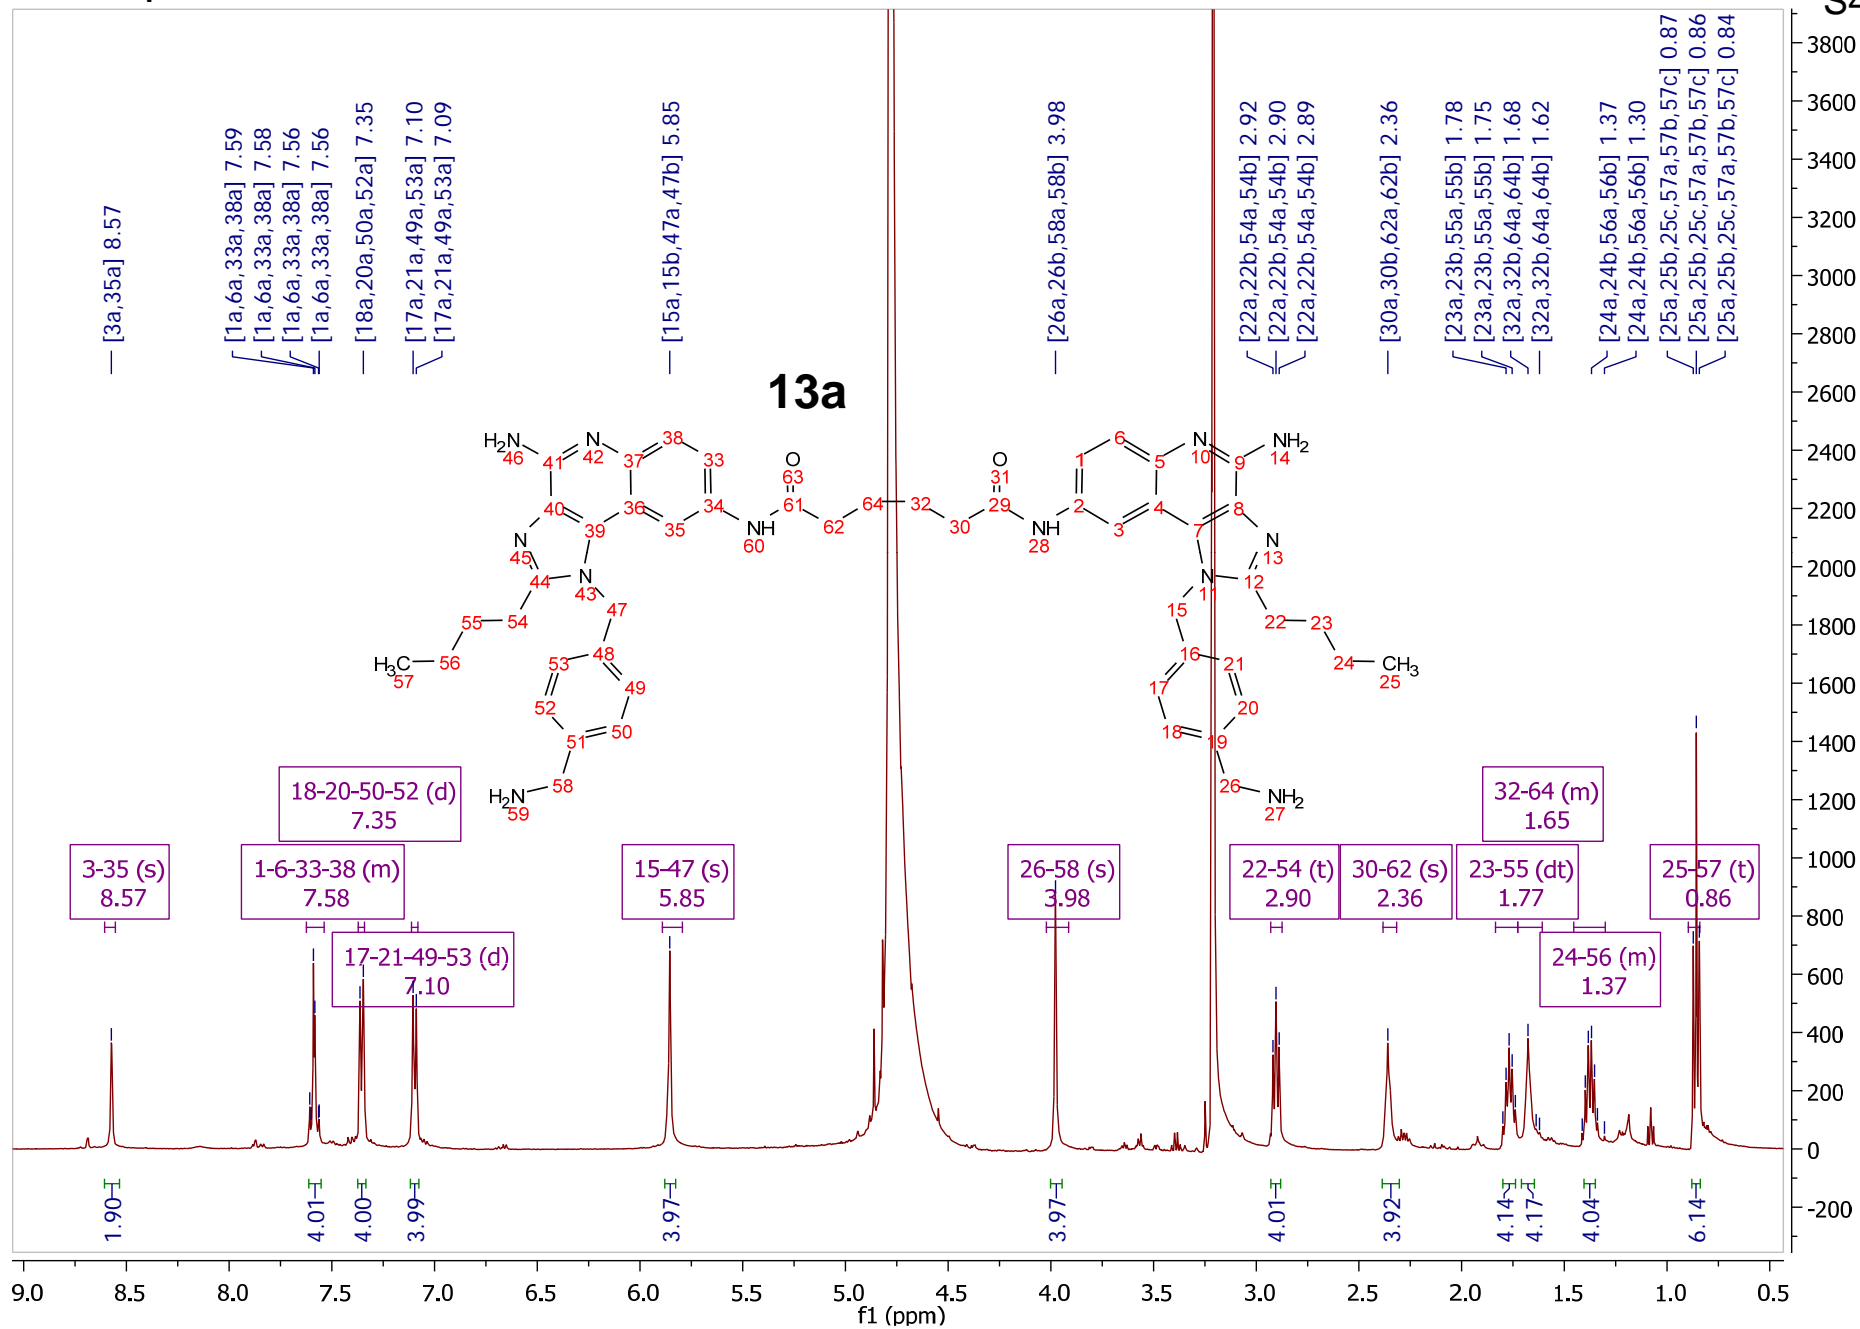

# <sup>13</sup>C Spectrum

S48

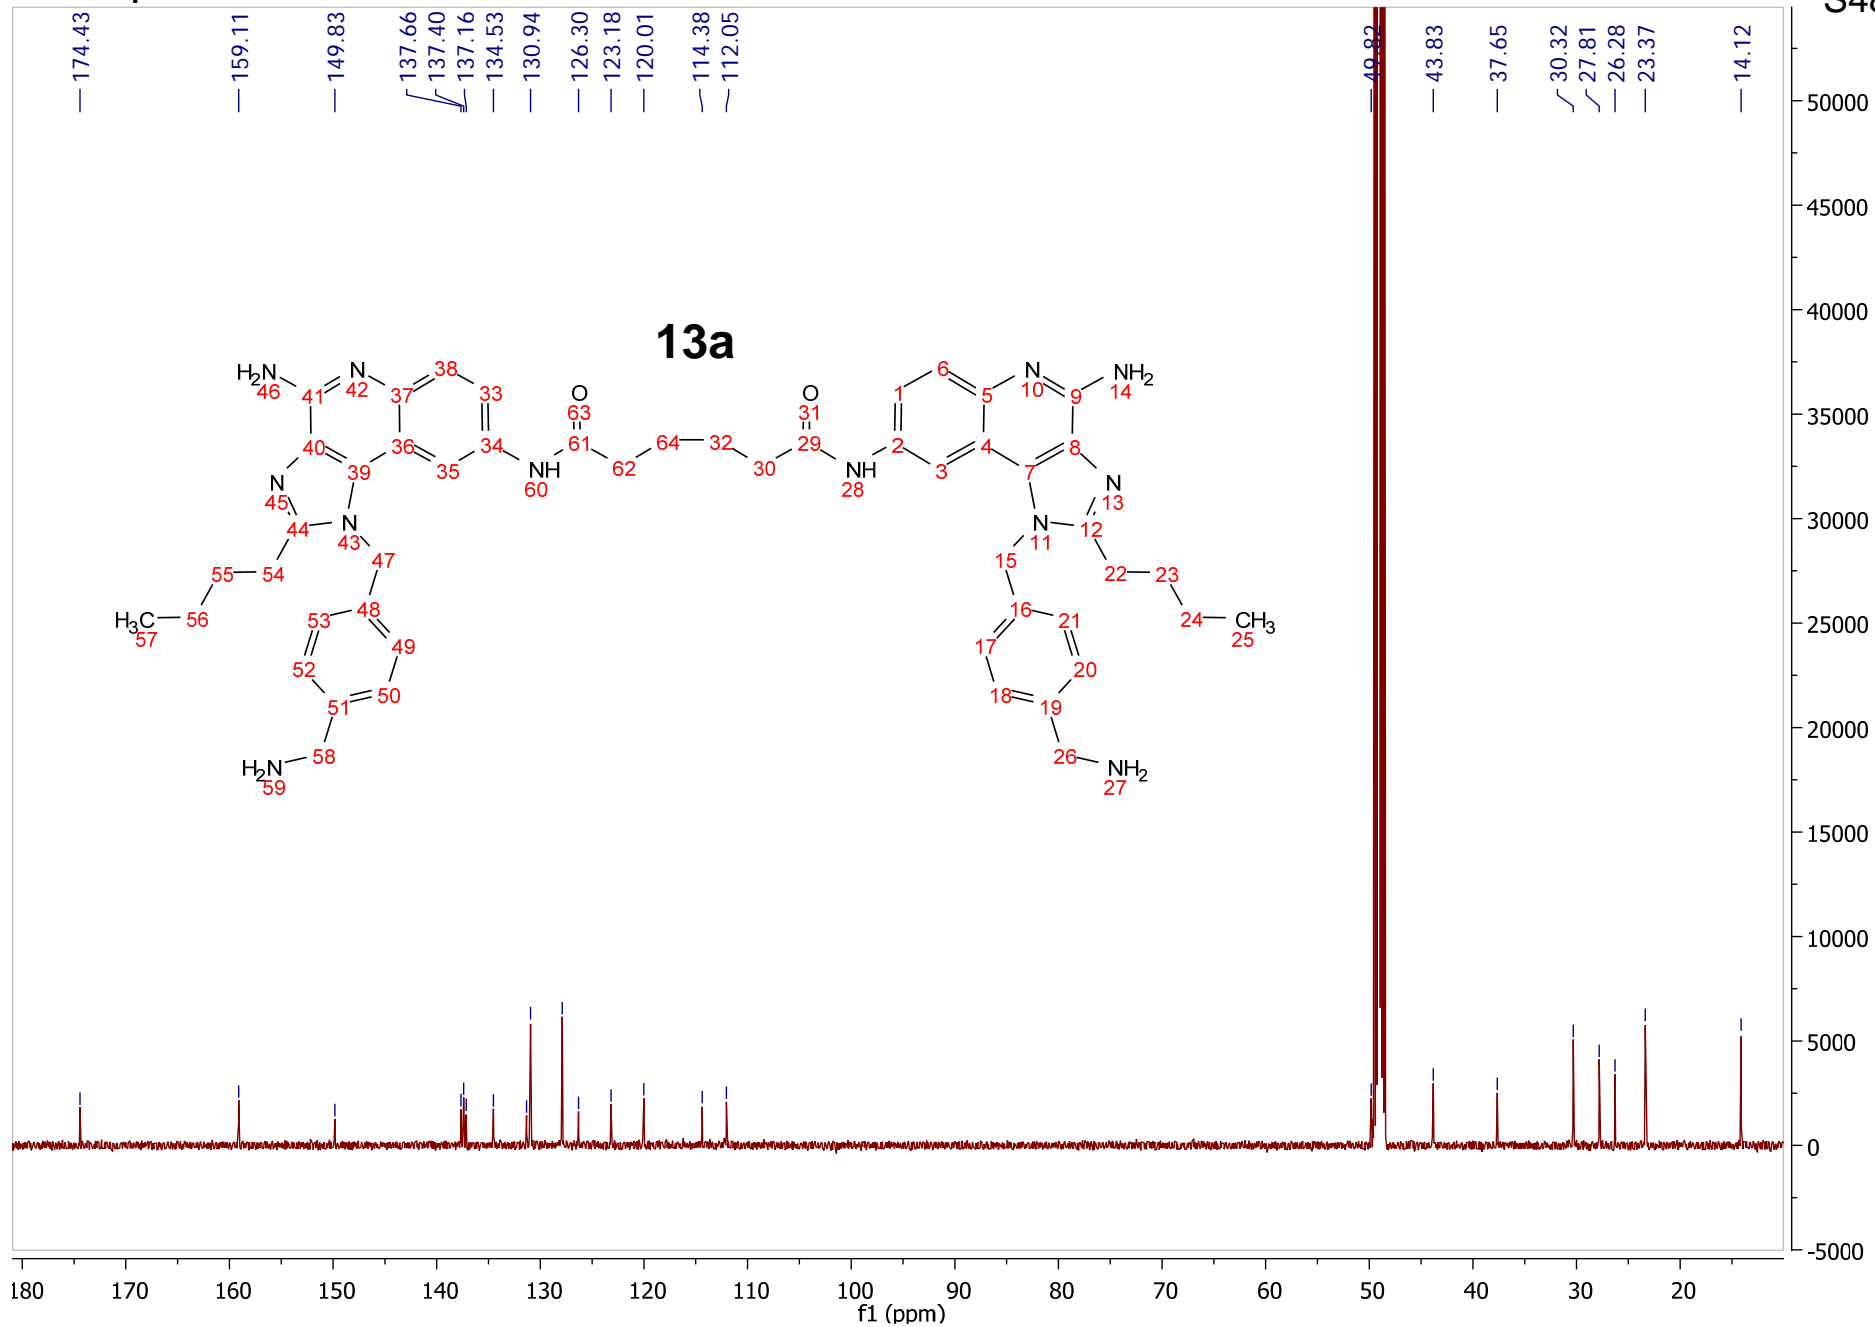



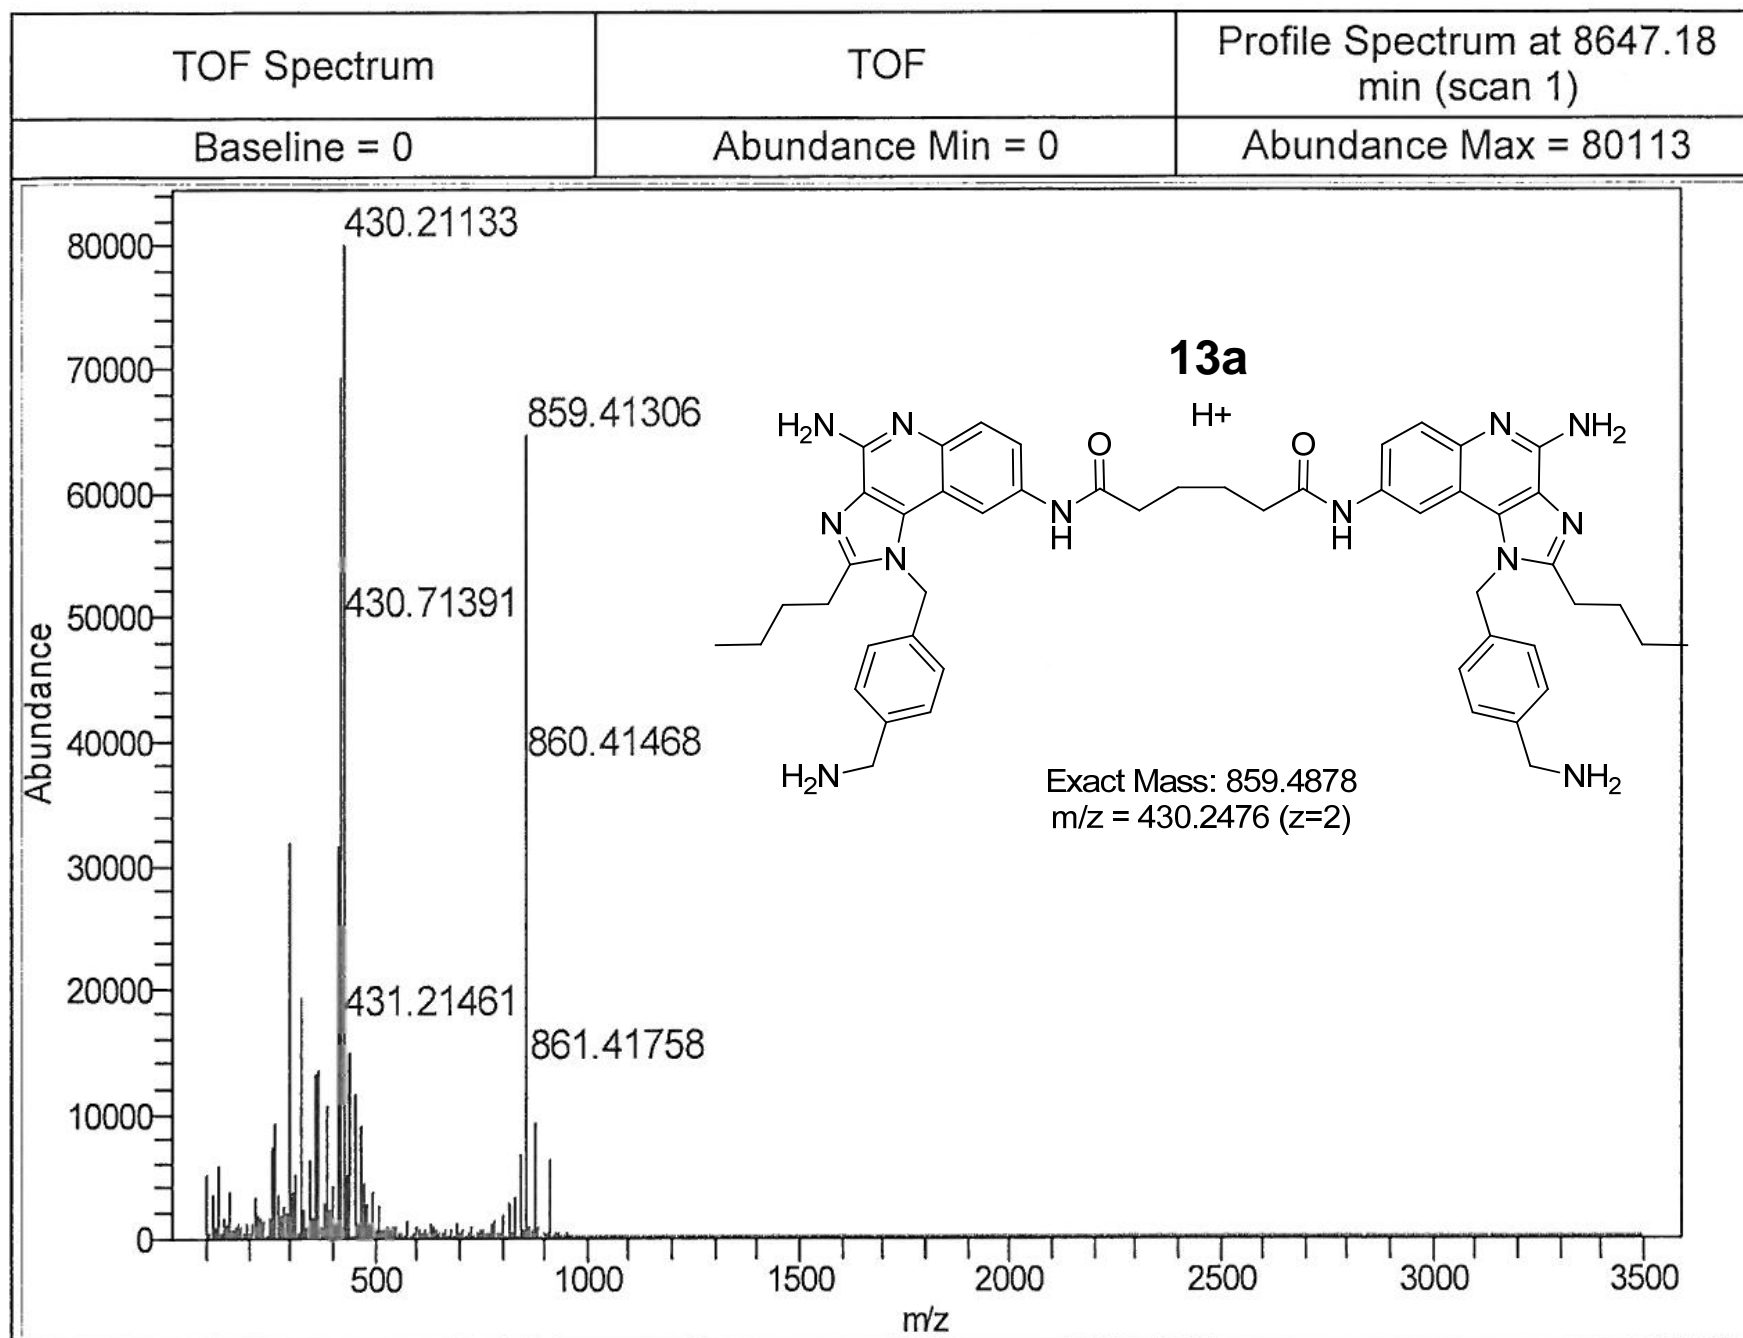

# <sup>1</sup>H Spectrum

S50

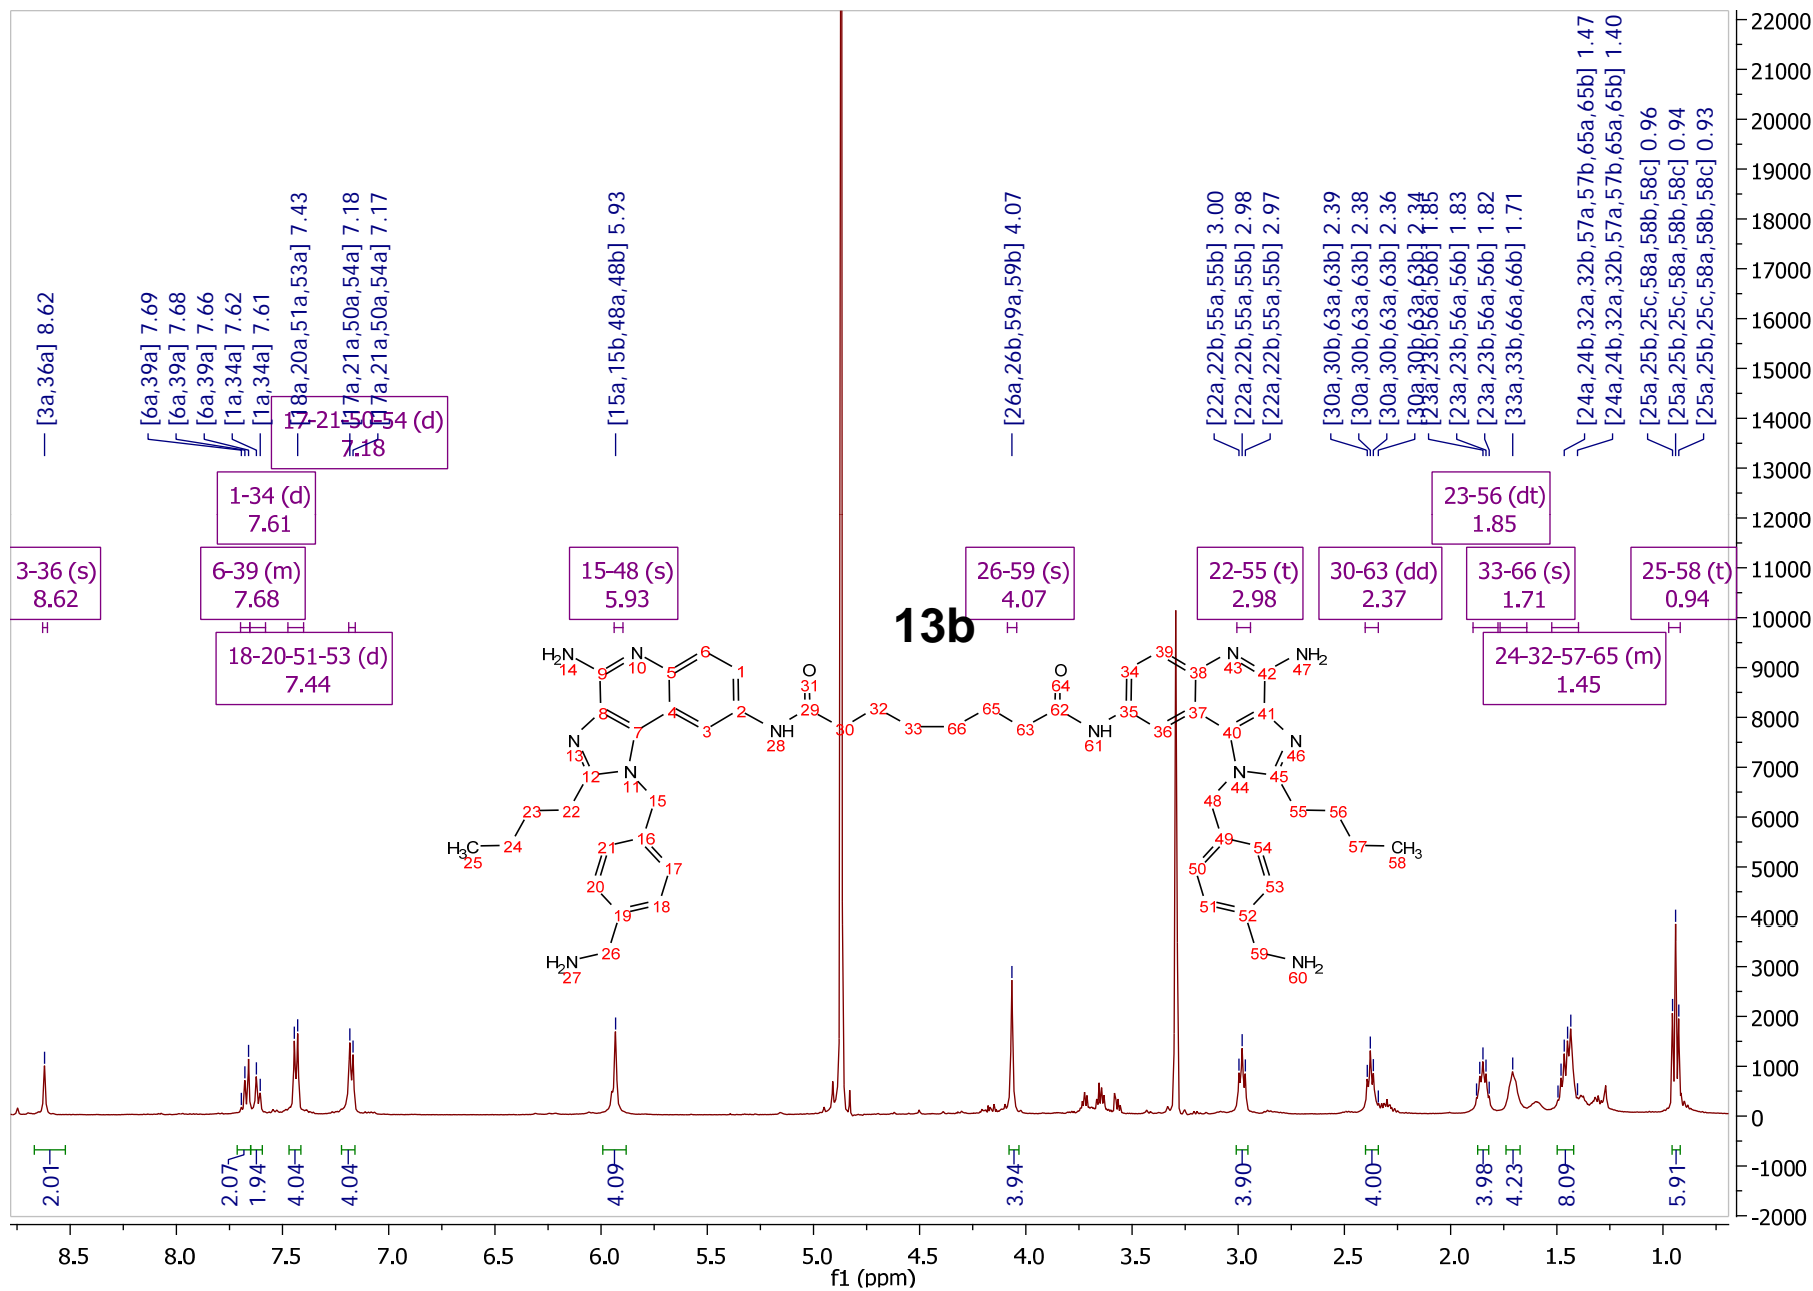

# <sup>13</sup>C Spectrum

S51

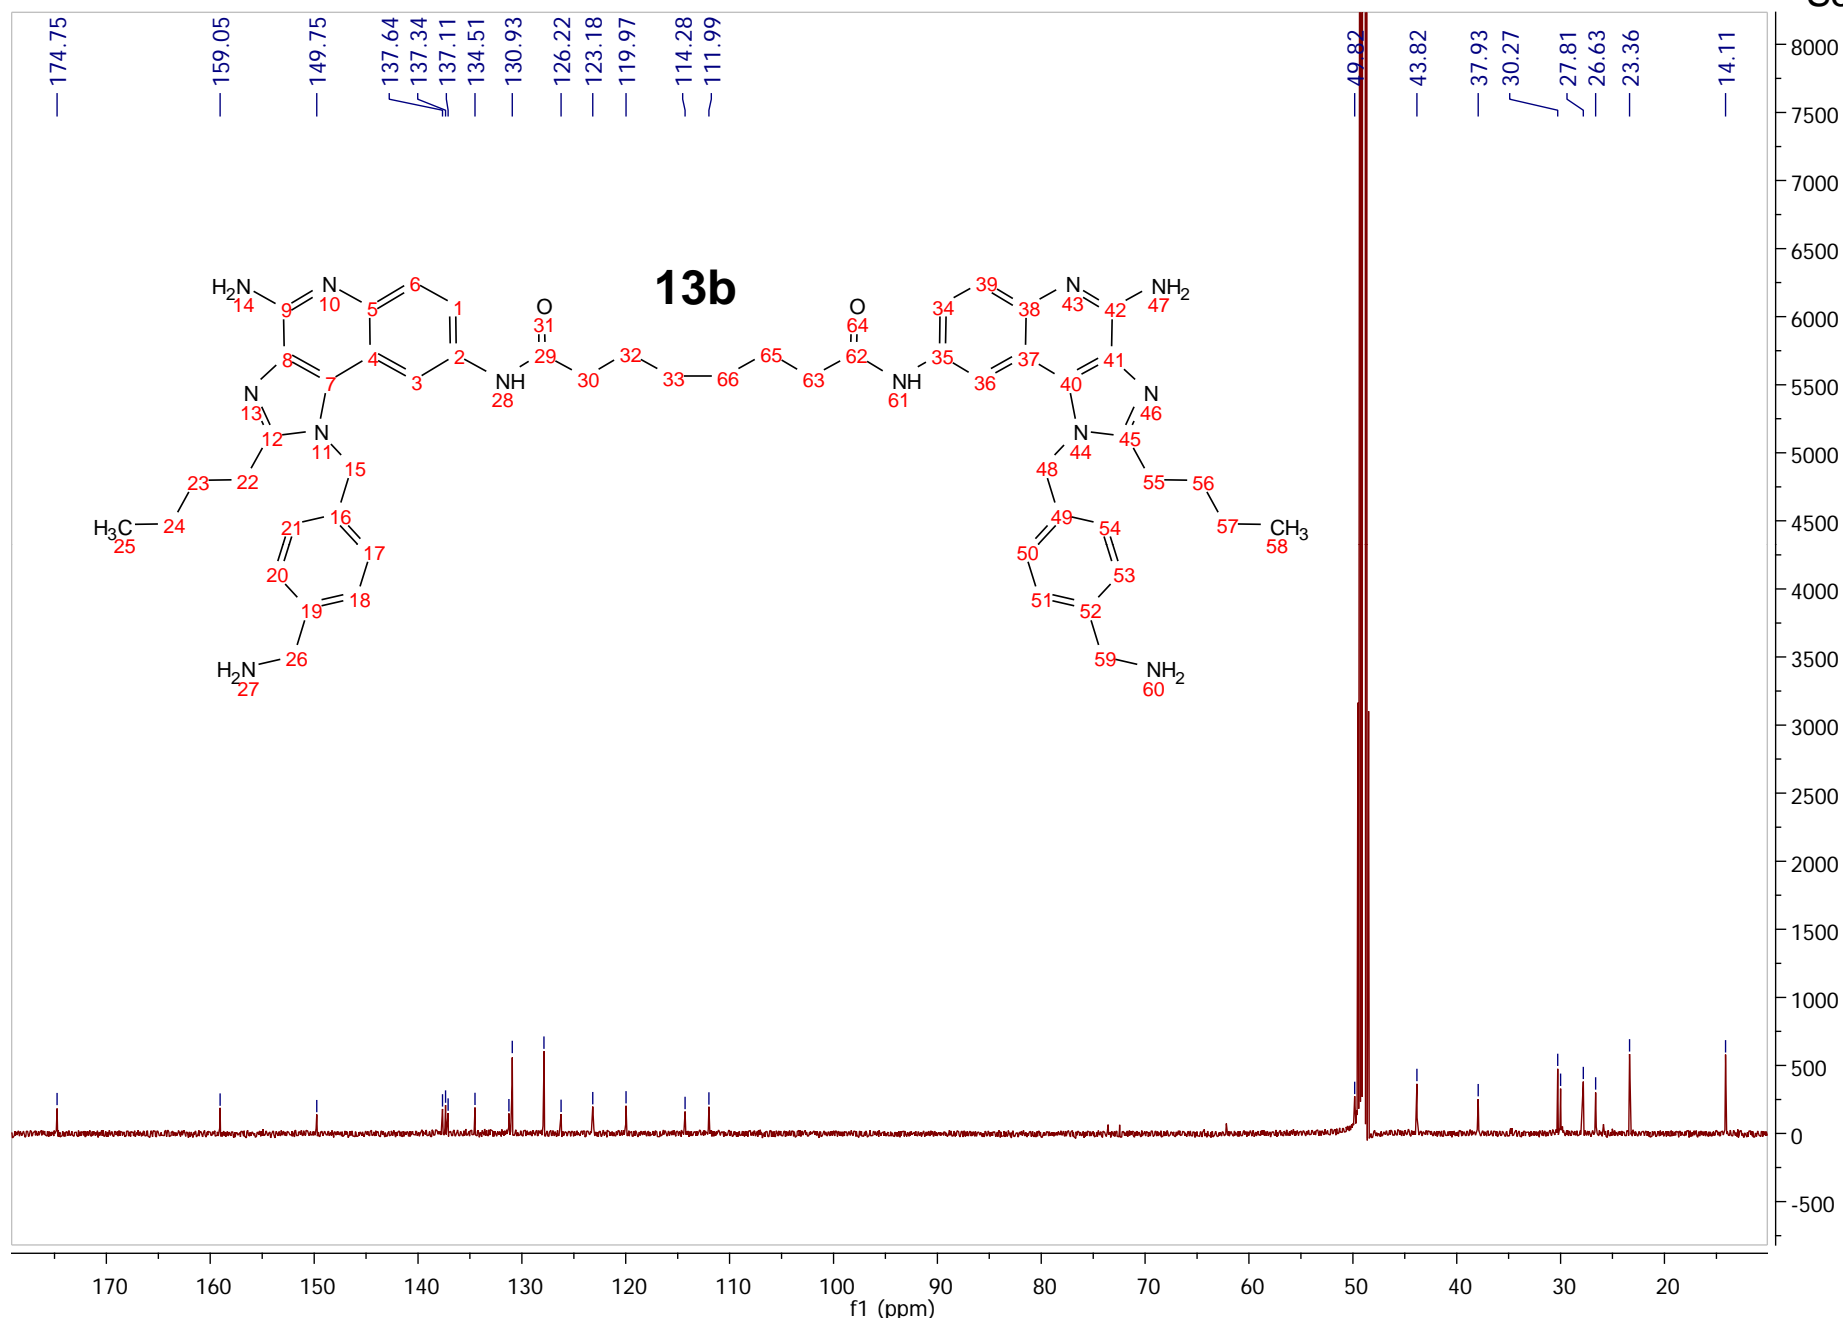

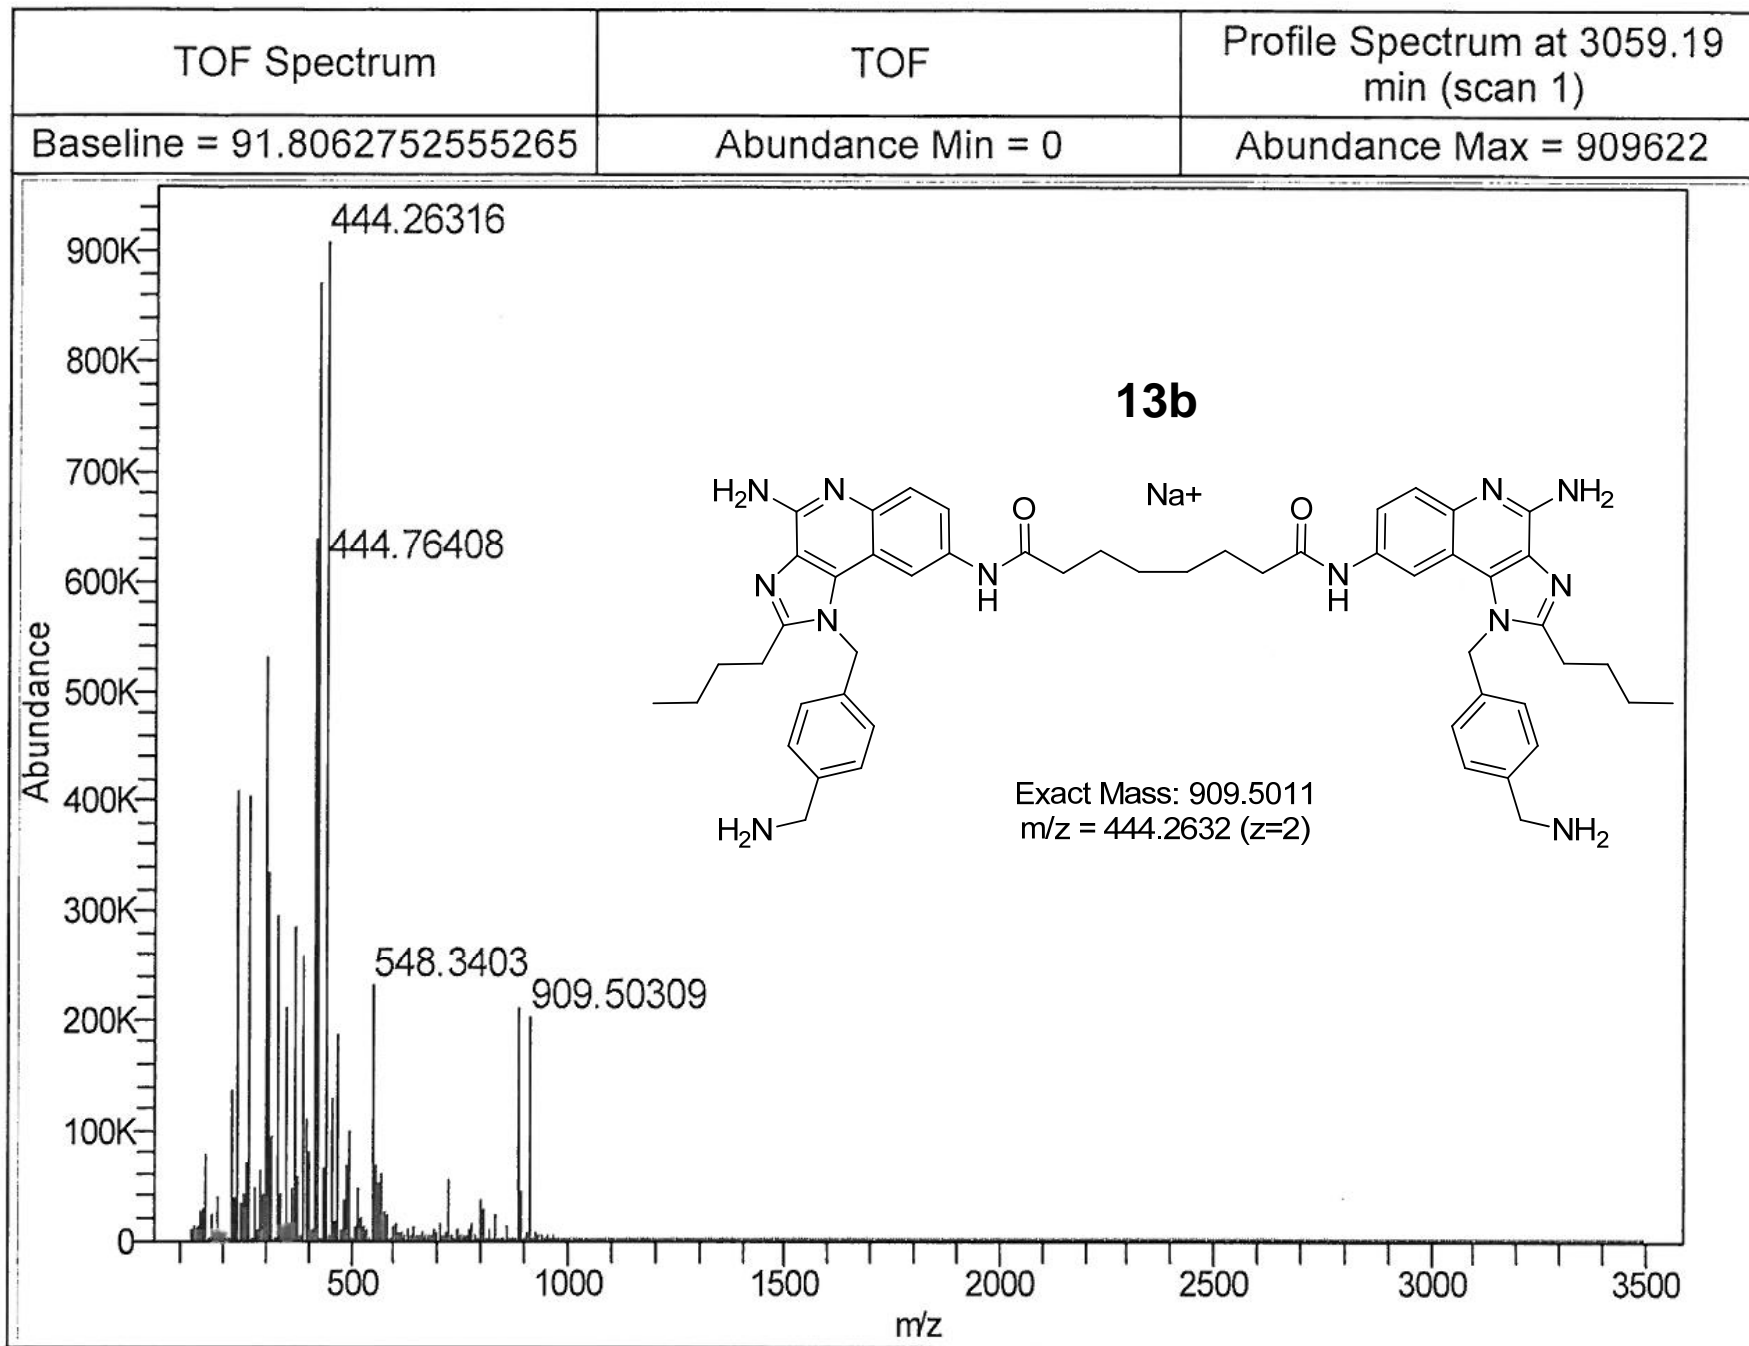

# <sup>1</sup>H Spectrum

S53

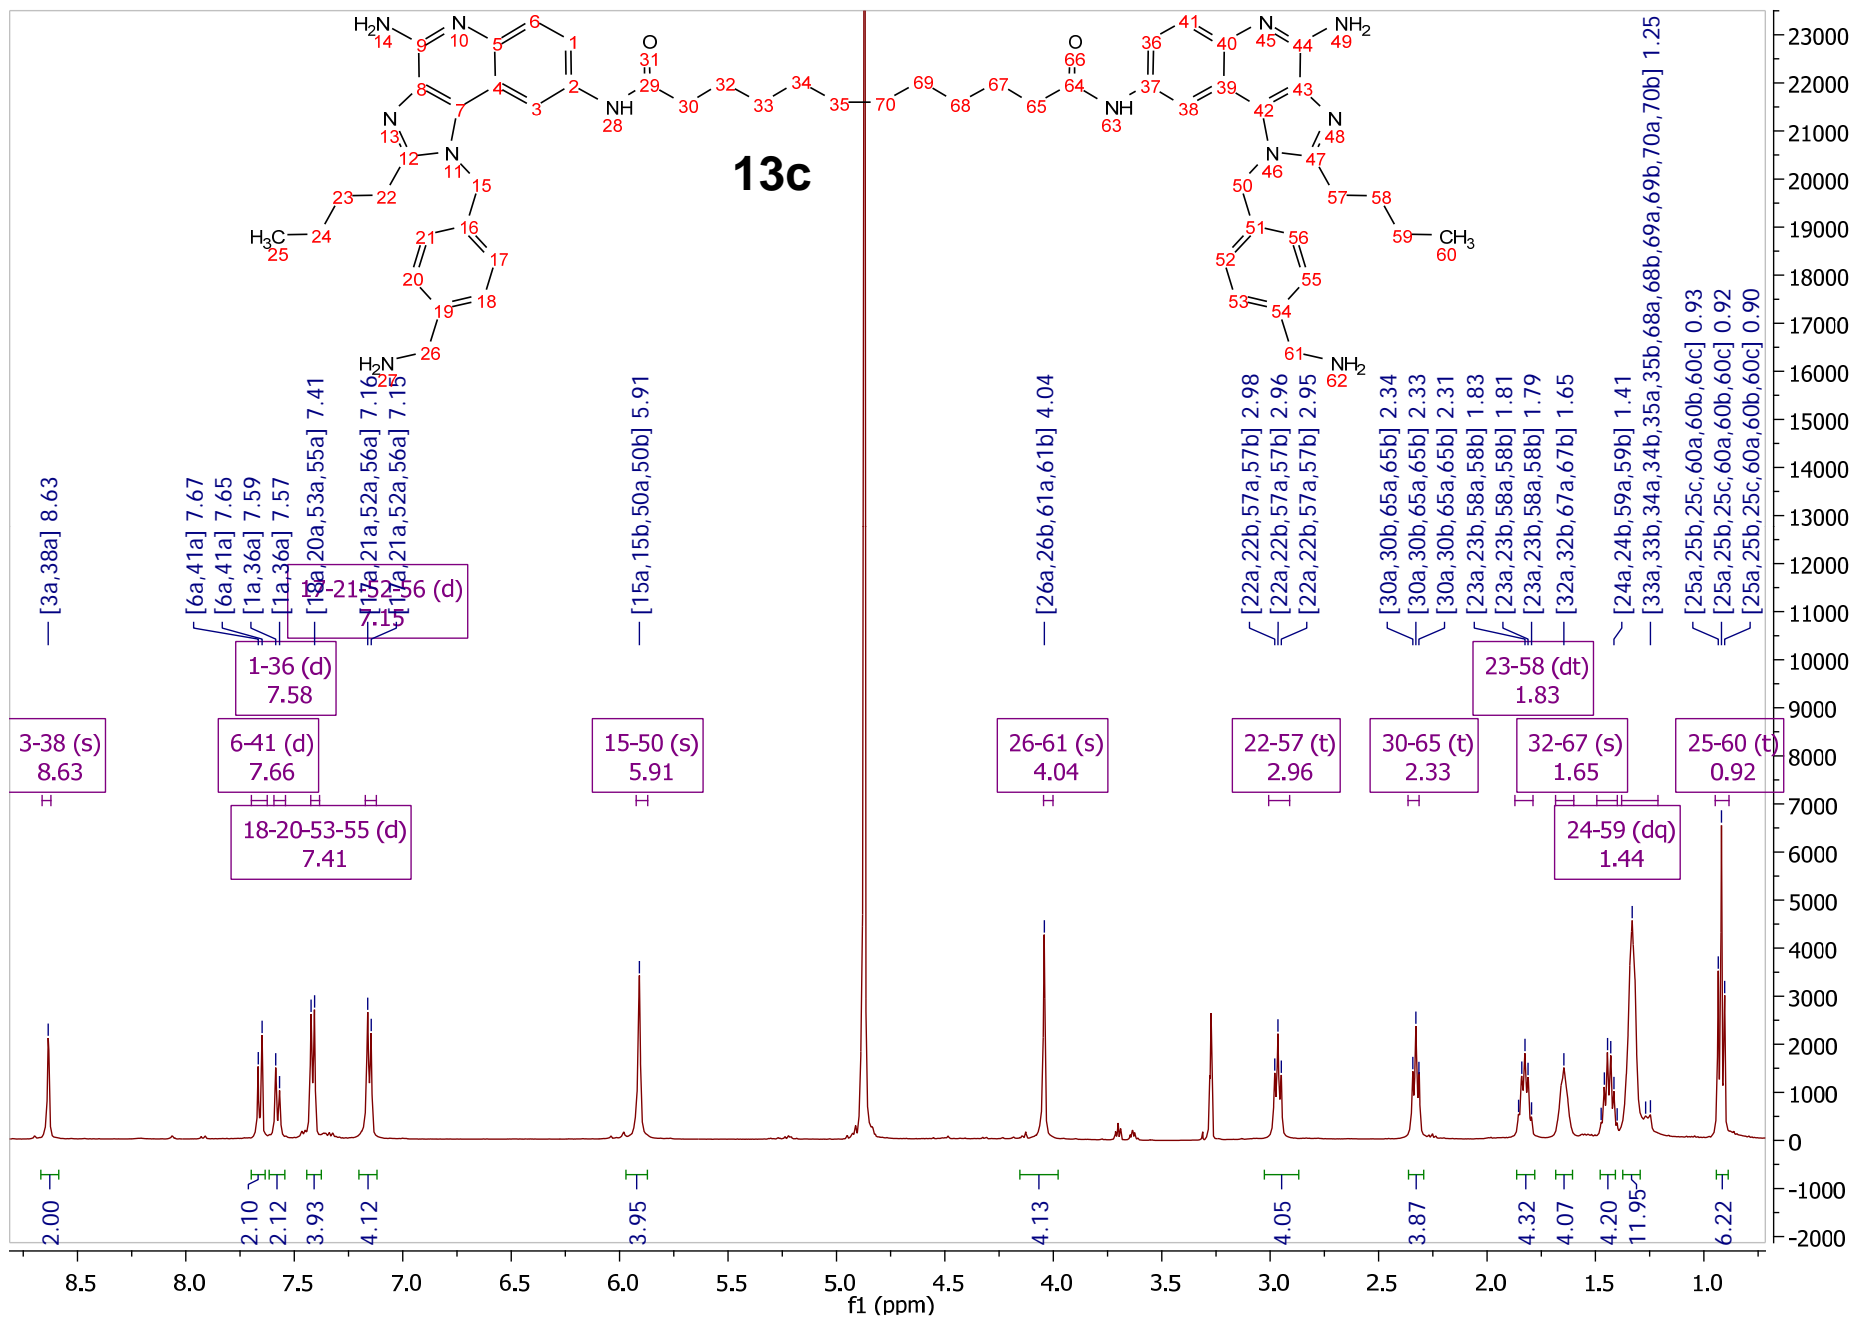

# <sup>13</sup>C Spectrum

S54

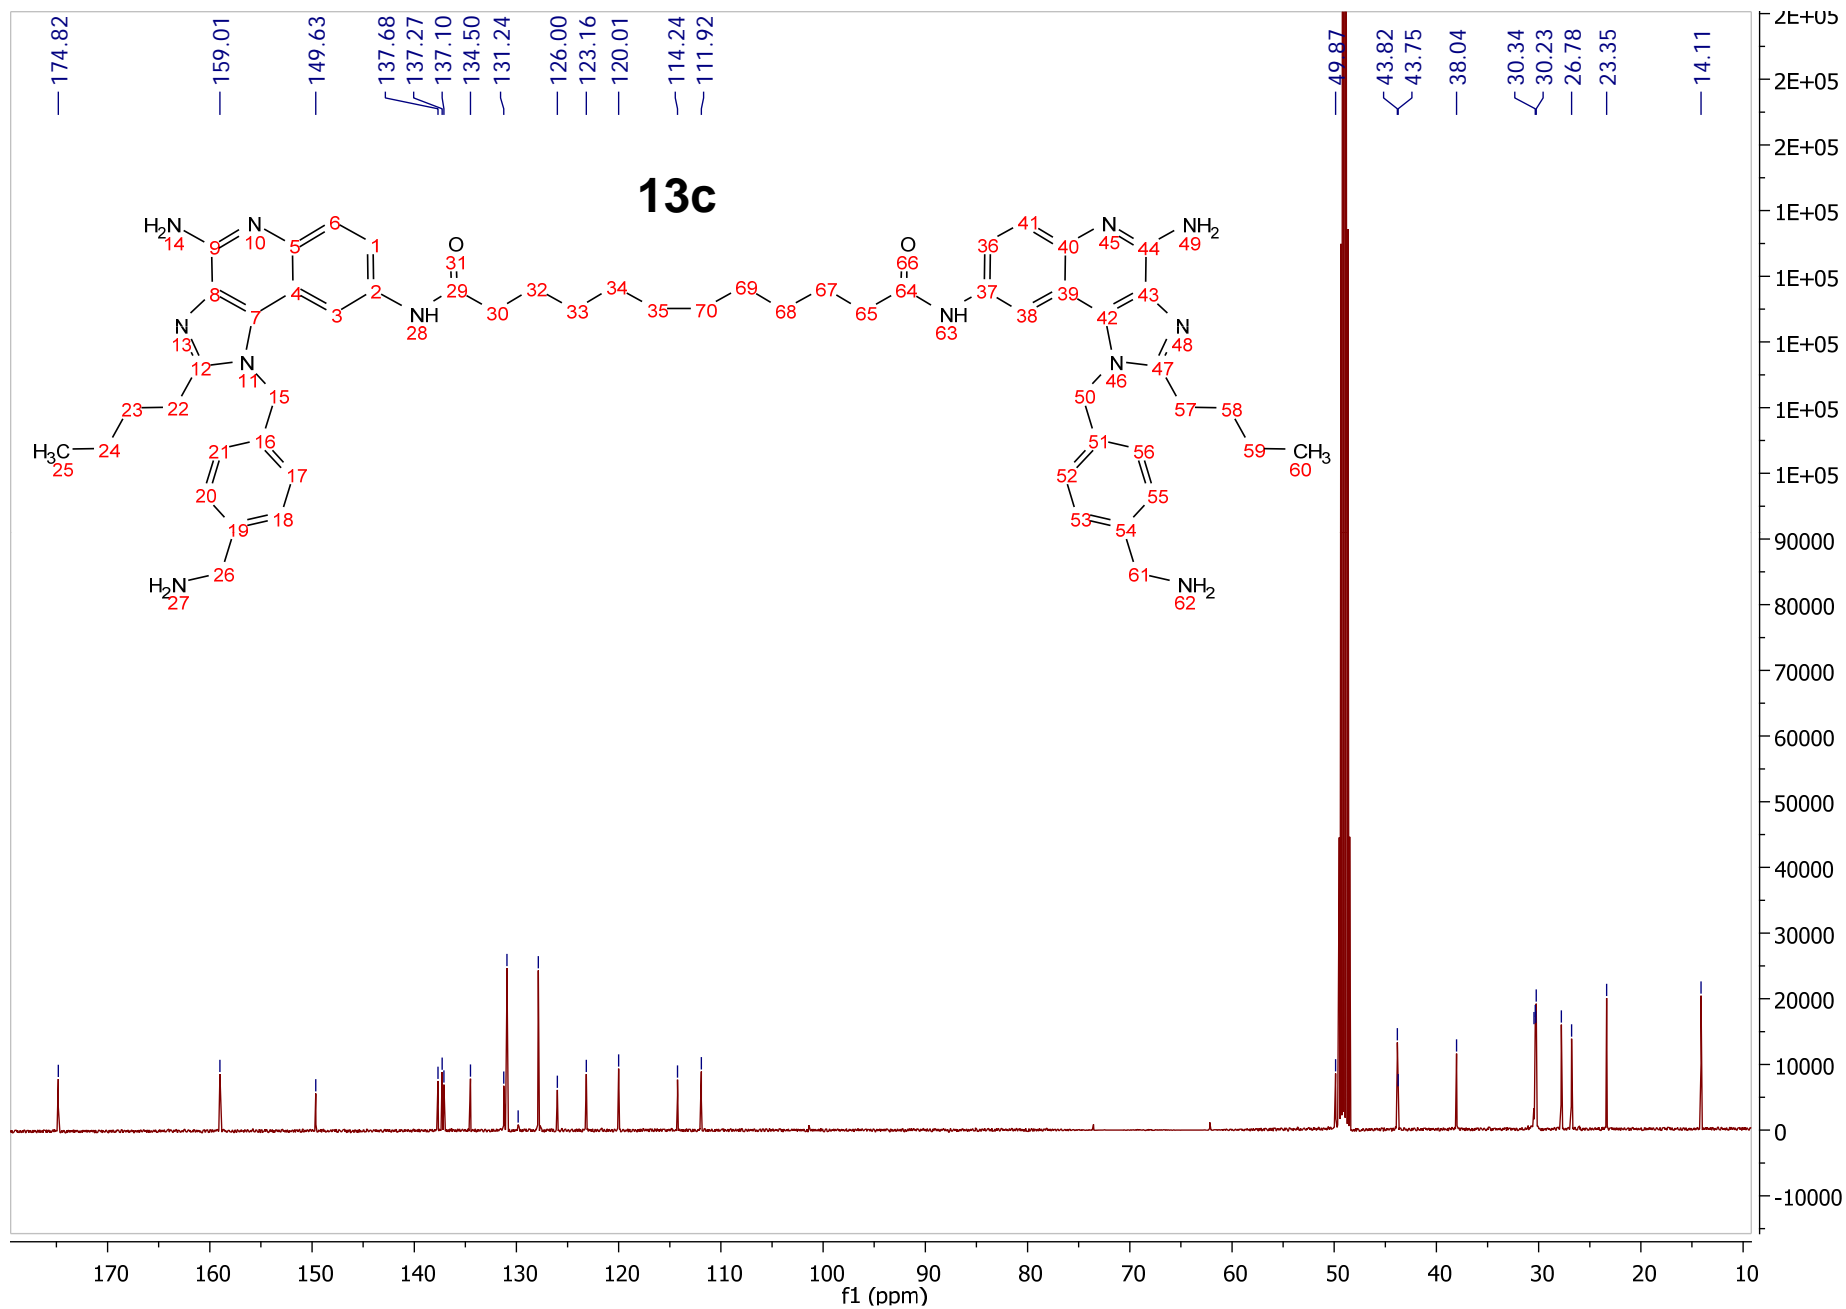

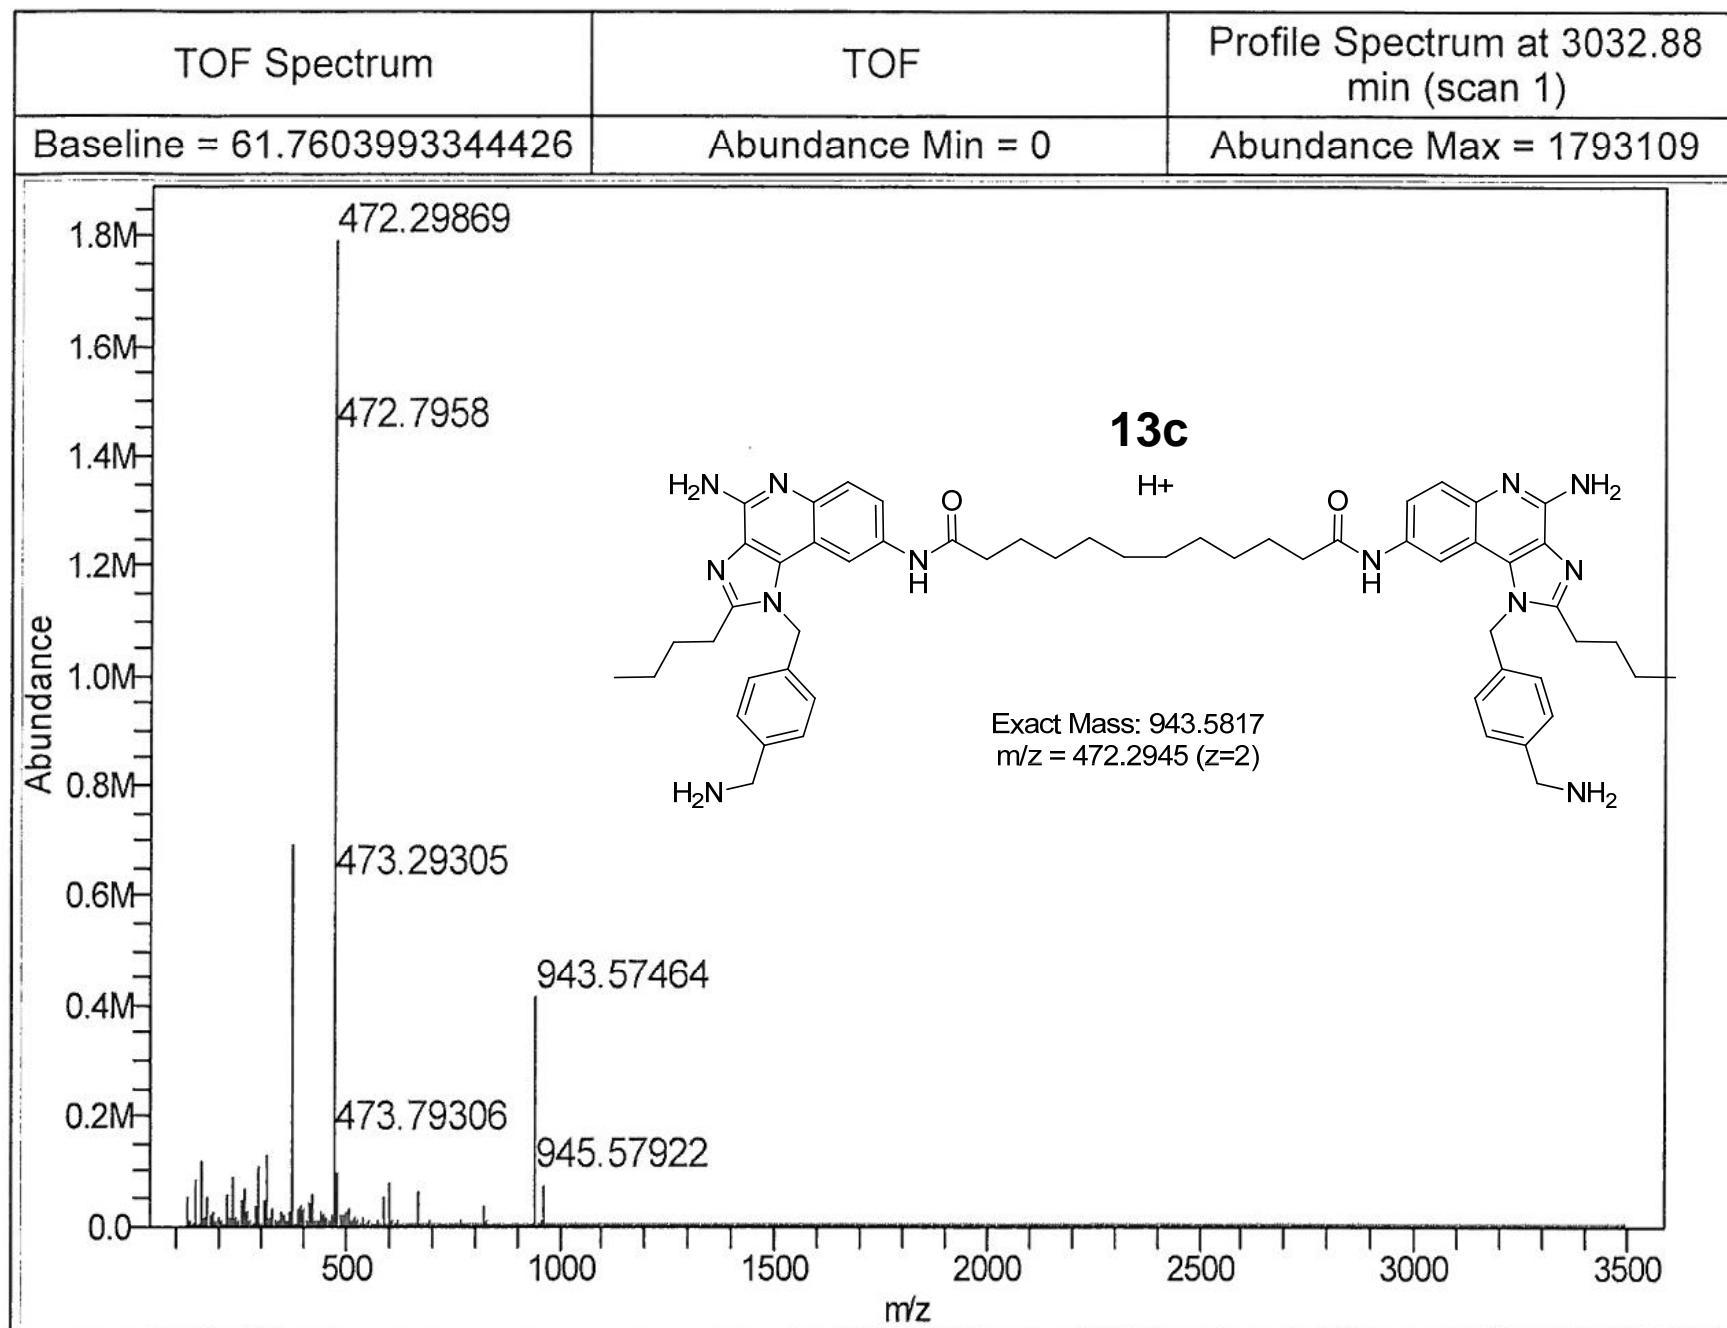

Supplement: NIHMS350968-supplement-1_si_001.pdf [file NIHMS350968-supplement-1_si_001.pdf]
